# Supplementary material for: Iron(iii)-catalyzed direct C–H radical amination of (hetero)arenes
Source: Royal Society of Chemistry journal article supplement (doi:10.1039/d1qo00710f), 2021-01-01

## Supporting Information

# Iron(III)-Catalyzed Direct C–H Amination of (Hetero)Arenes

Bin Lv<sup>a</sup>, Pan Gao<sup>a</sup>, Shuwei Zhang<sup>a</sup>, Xiaodong Jia<sup>a</sup>, Minyan Wang<sup>b,\*</sup>, Yu Yuan<sup>a,\*</sup>

<sup>a</sup>College of Chemistry and Chemical Engineering, Yangzhou University, Yangzhou 225002, China

<sup>b</sup>State Key Laboratory of Coordination Chemistry, School of Chemistry and Chemical Engineering, Nanjing University, Nanjing 210093, China

[yyuan@yzu.edu.cn](mailto:yyuan@yzu.edu.cn)

### Table of Contents

|                                                                                                |            |
|------------------------------------------------------------------------------------------------|------------|
| <b>1. General Information.....</b>                                                             | <b>S2</b>  |
| <b>2. Optimization the Reaction Conditions.....</b>                                            | <b>S2</b>  |
| <b>3. General Procedure for Arylamine.....</b>                                                 | <b>S4</b>  |
| <b>4. Characterization of Products.....</b>                                                    | <b>S4</b>  |
| <b>5. The Theoretical Regioselectivity Calculations .....</b>                                  | <b>S17</b> |
| <b>6. Reference .....</b>                                                                      | <b>S46</b> |
| <b>7. Copies of <sup>1</sup>H NMR, <sup>13</sup>C NMR and <sup>19</sup>F NMR Spectra. ....</b> | <b>S49</b> |

## 1. General Information.

All new compounds were fully characterized.  $^1\text{H}$  NMR and  $^{13}\text{C}$  NMR spectra were obtained with an Agilent Technologies 400 or 600 spectrometer in  $\text{CDCl}_3$  with TMS as an internal standard. Mass spectra were obtained on a Bruker Dalton maXis instrument. IR spectra were recorded on a FT-IR spectrometer. All reactions were carried out under air atmosphere. Unless otherwise noted, materials obtained from commercial suppliers without further purification. All reactions under standard conditions were monitored by thin-layer chromatography (TLC) on gel F254 plates. All reactions were monitored by TLC. Flash column chromatograph was carried out using 300–400 mesh silica gel at medium pressure.

## 2. Optimization the Reaction Conditions

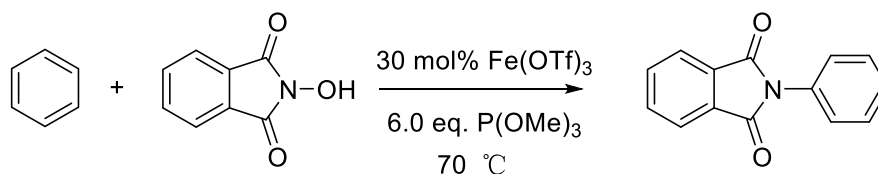

| Entry <sup>a</sup> | Fe (cat.)                            | Additive                           | T ( $^\circ\text{C}$ ) | Solvent | Yield (%) <sup>b</sup> |
|--------------------|--------------------------------------|------------------------------------|------------------------|---------|------------------------|
| 1 <sup>a</sup>     | $\text{FeCl}_3$ (30 mol%)            | $\text{P}(\text{OEt})_3$ (5.0 eq.) | 100                    | Benzene | 20                     |
| 2                  | $\text{Fe}(\text{acac})_3$ (30 mol%) | $\text{P}(\text{OEt})_3$ (5.0 eq.) | 100                    | Benzene | < 10                   |
| 3                  | $\text{Fe}(\text{OTs})_3$ (30 mol%)  | $\text{P}(\text{OEt})_3$ (5.0 eq.) | 100                    | Benzene | 12                     |
| 4                  | $\text{Fe}(\text{OTf})_3$ (30 mol%)  | $\text{P}(\text{OEt})_3$ (5.0 eq.) | 100                    | Benzene | 52                     |
| 5                  | $\text{FeCl}_2$ (30 mol%)            | $\text{P}(\text{OEt})_3$ (5.0 eq.) | 100                    | Benzene | < 10                   |
| 6                  | $\text{FeBr}_2$ (30 mol%)            | $\text{P}(\text{OEt})_3$ (5.0 eq.) | 100                    | Benzene | < 10                   |
| 7                  | $\text{Fe}(\text{OAc})_2$ (30 mol%)  | $\text{P}(\text{OEt})_3$ (5.0 eq.) | 100                    | Benzene | < 10                   |
| 8                  | $\text{Fe}(\text{OTf})_2$ (30 mol%)  | $\text{P}(\text{OEt})_3$ (5.0 eq.) | 100                    | Benzene | 49                     |
| 9                  | $\text{FePO}_4$ (30 mol%)            | $\text{P}(\text{OEt})_3$ (5.0 eq.) | 100                    | Benzene | < 10                   |
| 10                 | $\text{Fe}(\text{OTf})_3$ (50 mol%)  | $\text{P}(\text{OEt})_3$ (5.0 eq.) | 100                    | Benzene | 47                     |
| 11                 | $\text{Fe}(\text{OTf})_3$ (15 mol%)  | $\text{P}(\text{OEt})_3$ (5.0 eq.) | 100                    | Benzene | 52                     |

|                 |                                |                                         |      |                    |      |
|-----------------|--------------------------------|-----------------------------------------|------|--------------------|------|
| 12              | Fe(OTf) <sub>3</sub> (5 mol%)  | P(OEt) <sub>3</sub> (5.0 eq.)           | 100  | Benzene            | 28   |
| 13              | --                             | P(OEt) <sub>3</sub> (5.0 eq.)           | 100  | Benzene            | < 10 |
| 14              | Fe(OTf) <sub>3</sub> (30 mol%) | P(OEt) <sub>3</sub> (8.0 eq.)           | 100  | Benzene            | 51   |
| 15              | Fe(OTf) <sub>3</sub> (30 mol%) | P(OEt) <sub>3</sub> (6.0 eq.)           | 100  | Benzene            | 62   |
| 16              | Fe(OTf) <sub>3</sub> (30 mol%) | P(OEt) <sub>3</sub> (3.0 eq.)           | 100  | Benzene            | 21   |
| 17              | Fe(OTf) <sub>3</sub> (30 mol%) | P(OEt) <sub>3</sub> (1.5 eq.)           | 100  | Benzene            | < 10 |
| 18              | Fe(OTf) <sub>3</sub> (30 mol%) | --                                      | 100  | Benzene            | NR   |
| 19              | Fe(OTf) <sub>3</sub> (30 mol%) | P(OMe) <sub>3</sub> (6.0 eq.)           | 100  | Benzene            | 76   |
| 20              | Fe(OTf) <sub>3</sub> (30 mol%) | P(OPh) <sub>3</sub> (6.0 eq.)           | 100  | Benzene            | 39   |
| 21              | Fe(OTf) <sub>3</sub> (30 mol%) | OP(OEt) <sub>3</sub> (6.0 eq.)          | 100  | Benzene            | < 10 |
| 22              | Fe(OTf) <sub>3</sub> (30 mol%) | P( <i>t</i> -Bu) <sub>3</sub> (6.0 eq.) | 100  | Benzene            | < 10 |
| 23 <sup>c</sup> | Fe(OTf) <sub>3</sub> (30 mol%) | P(OMe) <sub>3</sub> (6.0 eq.)           | 100  | DCM                | 53   |
| 24 <sup>c</sup> | Fe(OTf) <sub>3</sub> (30 mol%) | P(OMe) <sub>3</sub> (6.0 eq.)           | 100  | DCE                | 50   |
| 25 <sup>c</sup> | Fe(OTf) <sub>3</sub> (30 mol%) | P(OMe) <sub>3</sub> (6.0 eq.)           | 100  | CH <sub>3</sub> CN | 43   |
| 26 <sup>c</sup> | Fe(OTf) <sub>3</sub> (30 mol%) | P(OMe) <sub>3</sub> (6.0 eq.)           | 100  | THF                | < 10 |
| 27 <sup>c</sup> | Fe(OTf) <sub>3</sub> (30 mol%) | P(OMe) <sub>3</sub> (6.0 eq.)           | 100  | DMF                | NR   |
| 28 <sup>c</sup> | Fe(OTf) <sub>3</sub> (30 mol%) | P(OMe) <sub>3</sub> (6.0 eq.)           | 100  | DMSO               | NR   |
| 29 <sup>c</sup> | Fe(OTf) <sub>3</sub> (30 mol%) | P(OMe) <sub>3</sub> (6.0 eq.)           | 100  | 1,4-dioxane        | NR   |
| 30 <sup>c</sup> | Fe(OTf) <sub>3</sub> (30 mol%) | P(OMe) <sub>3</sub> (6.0 eq.)           | 100  | Ethanol            | NR   |
| 31              | Fe(OTf) <sub>3</sub> (30 mol%) | P(OMe) <sub>3</sub> (6.0 eq.)           | r.t. | Benzene            | NR   |
| 32              | Fe(OTf) <sub>3</sub> (30 mol%) | P(OMe) <sub>3</sub> (6.0 eq.)           | 50   | Benzene            | 43   |
| 33              | Fe(OTf) <sub>3</sub> (30 mol%) | P(OMe) <sub>3</sub> (6.0 eq.)           | 70   | Benzene            | 88   |
| 34 <sup>d</sup> | Fe(OTf) <sub>3</sub> (30 mol%) | P(OMe) <sub>3</sub> (6.0 eq.)           | 70   | Benzene            | 75   |

[a] *N*-hydroxyphthalimide (0.1 mmol), Fe (cat.) (30 mol%), additive, benzene (2.0 mL), 70 °C, air.

[b] Yield after purification.

[c] *N*-hydroxyphthalimide (0.1 mmol), benzene (1.0 mmol), Fe(OTf)<sub>3</sub> (30 mol%), P(OMe)<sub>3</sub> (6.0 eq), solvent (2.0 mL), 70 °C, air.

[d] *N*-hydroxyphthalimide (0.1 mmol), benzene (1.0 mmol), Fe(OTf)<sub>3</sub> (30 mol%), P(OMe)<sub>3</sub> (6.0 eq), solvent (2.0 mL), 70 °C, N<sub>2</sub>.

### 3. General Procedure for Arylamine

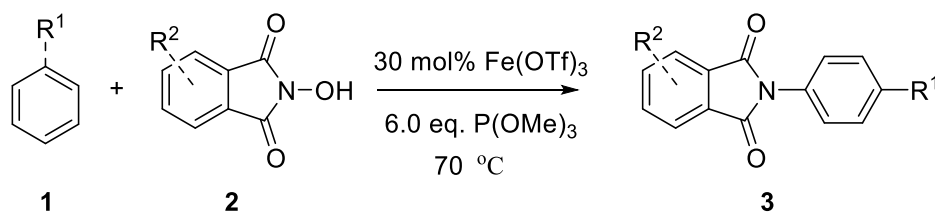

To a 15 mL sealed tube was added *N*-hydroxyphthalimide **2** (0.1 mmol), Fe(OTf)<sub>3</sub> (0.03 mmol), trimethyl phosphite (0.6 mmol) and (hetero)arene **1** (2 mL). The formed mixture was stirred at 70 °C under air for 12 h monitored by TLC. The solution was then cooled to room temperature and the solvent was removed under vacuum directly. The crude products were purified by column chromatography on silica gel to afford the desired product **3**.

### 4. Characterization of Products

#### 2-Phenylisoindoline-1,3-dione (**3aa**)<sup>[2]</sup>

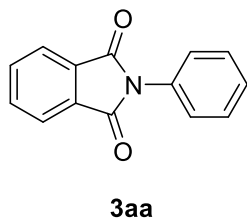

Following the general procedure, the reaction of *N*-hydroxyphthalimide **2a** (1.0 equiv., 0.1 mmol, 16.3 mg), Fe(OTf)<sub>3</sub> (30 mol%, 0.03 mmol, 15.1 mg), trimethyl phosphite (6.0 equiv., 0.6 mmol, 74.4 mg) in benzene (2 mL) at 70 °C under air for 12 h. The crude product was purified by column chromatography on silica gel to afford **3aa** (19.7 mg, 88%) as a white solid. <sup>1</sup>H NMR (400 MHz, CDCl<sub>3</sub>) δ 7.96 – 7.94 (m, 2H), 7.82 – 7.75 (m, 2H), 7.53–7.49 (m, 2H), 7.47 – 7.35 (m, 3H). <sup>13</sup>C NMR (101 MHz, CDCl<sub>3</sub>) δ 167.26, 134.37, 131.73, 131.64, 129.09, 128.08, 126.55, 123.73. IR (ν, cm<sup>-1</sup>) 1730, 1700, 1382, 1100, 1068, 877, 704. HRMS m/z (ESI): calcd for C<sub>14</sub>H<sub>9</sub>NaO<sub>2</sub> (M + Na)<sup>+</sup> 246.0531, found 246.0523.

#### 2-(2-Ethylphenyl)isoindoline-1,3-dione (**3baa**) and 2-(4-ethylphenyl)isoindoline-1,3-dione (**3bab**)<sup>[2]</sup>

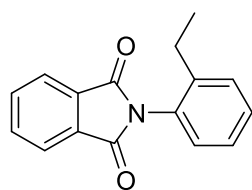

**3baa**

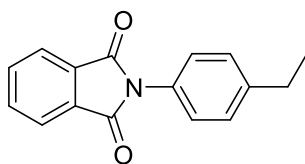

**3bab**

Following the general procedure, the reaction of *N*-hydroxyphthalimide (1.0 equiv., 0.1 mmol, 16.3 mg), Fe(OTf)<sub>3</sub> (30 mol%, 0.03 mmol, 15.1 mg), trimethyl phosphite (6.0

equiv., 0.6 mmol, 74.4 mg) in ethylbenzene (2 mL) at 70 °C under air for 24 h. The crude product was purified by column chromatography on silica gel to afford **3ba** (24.6 mg, 98%, **3baa:3bab** = 1:7) as a white solid. The isomer ratio was determined by <sup>1</sup>H NMR spectroscopy. <sup>1</sup>H NMR (400 MHz, CDCl<sub>3</sub>) δ 7.96 – 7.93 (m, 2H), 7.82 – 7.74 (m, 2H), 7.41 (t, *J* = 8.1 Hz, 1H [**3bab**]), 7.33 (s, 2H [**3bab**]), 7.27 – 7.20 (m, 3H), 7.17 (d, *J* = 7.6 Hz, 1H [**3baa**]), 2.76 – 2.65 (m, 2H [**3bab**]), 2.52 (d, *J* = 7.6 Hz, 2H [**3baa**]), 1.27 (t, *J* = 7.6 Hz, 3H [**3bab**]), 1.16 (t, *J* = 7.6 Hz, 3H [**3baa**]). <sup>13</sup>C NMR (101 MHz, CDCl<sub>3</sub>) δ 167.45, 167.40, 145.36, 144.37, 134.32, 134.30, 131.81, 131.52, 129.27, 128.97, 128.60, 127.82, 126.47, 126.13, 123.93, 123.76, 123.68, 28.68, 28.58, 15.40, 15.25. IR (ν, cm<sup>-1</sup>) 1744, 1710, 1518, 1379, 1111, 1081, 883, 715. HRMS *m/z* (ESI): calcd for C<sub>16</sub>H<sub>13</sub>NNaO<sub>2</sub> (M + Na)<sup>+</sup> 274.0844, found 274.0840.

**2-(2-Isopropylphenyl)isoindoline-1,3-dione (3caa)**

**and 2-(4-**

**isopropylphenyl)isoindoline-1,3-dione (3cab)<sup>[3]</sup>**

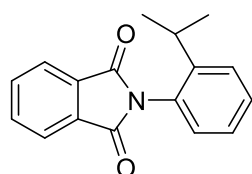

**3caa**

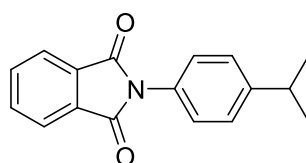

**3cab**

Following the general procedure, the reaction of *N*-hydroxyphthalimide (1.0 equiv., 0.1 mmol, 16.3 mg), Fe(OTf)<sub>3</sub> (30 mol%, 0.03 mmol, 15.1

mg), trimethyl phosphite (6.0 equiv., 0.6 mmol, 74.4 mg) in cumene (2 mL) at 70 °C under air for 24 h. The crude product was purified by column chromatography on silica gel to afford **3ca** (16.2 mg, 61%, **3caa:3cab** = 1:8) as a white solid. The isomer ratio was determined by <sup>1</sup>H NMR spectroscopy. <sup>1</sup>H NMR (400 MHz, CDCl<sub>3</sub>) δ 7.96 – 7.92 (m, 2H), 7.80–7.76 (m, 2H), 7.47 (d, *J* = 1.0 Hz, 1H [**3caa**]), 7.42 (t, *J* = 8.1 Hz, 1H [**3cab**]), 7.35 (d, *J* = 1.8 Hz, 1H), 7.27 (dd, *J* = 5.0, 2.9 Hz, 1H), 7.25 – 7.21 (m, 1H

[**3cab**]), 7.15 (d,  $J = 7.6$  Hz, 1H [**3caa**]), 3.00 – 2.93 (m, 1H [**3cbb**]), 2.86 – 2.75 (m, 1H [**3caa**]), 1.28 (dd,  $J = 6.9, 1.7$  Hz, 6H [**3cab**]), 1.19 (d,  $J = 6.9$  Hz, 6H [**3caa**]).  **$^{13}\text{C}$  NMR (101 MHz,  $\text{CDCl}_3$ )**  $\delta$  167.41, 167.37, 149.92, 148.83, 134.29, 134.27, 131.74, 131.48, 129.94, 129.47, 129.10, 128.92, 127.15, 126.72, 126.66, 126.38, 126.31, 124.81, 123.97, 123.72, 123.62, 120.29, 115.23, 33.95, 33.86, 23.86, 23.80. **IR (v,  $\text{cm}^{-1}$ )** 1744, 1707, 1375, 1232, 1113, 1081, 832, 719. **HRMS  $m/z$  (ESI):** calcd for  $\text{C}_{17}\text{H}_{15}\text{NNaO}_2$  ( $\text{M} + \text{Na}$ )<sup>+</sup> 288.1000, found 288.0997.

### 2-(4-(*Tert*-butyl)phenyl)isoindoline-1,3-dione (**3da**)<sup>[4]</sup>

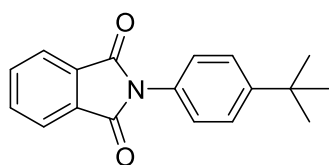

**3da**

Following the general procedure, the reaction of *N*-hydroxyphthalimide (1.0 equiv., 0.1 mmol, 16.3 mg),  $\text{Fe}(\text{OTf})_3$  (30 mol%, 0.03 mmol, 15.1 mg), trimethyl phosphite (6.0 equiv., 0.6 mmol, 74.4 mg) in *tert*-butylbenzene (2 mL) at 70 °C under air for 24 h. The crude product was purified by column chromatography on silica gel to afford **3da** (21.0 mg, 75%) as a white solid.  **$^1\text{H}$  NMR (400 MHz,  $\text{CDCl}_3$ )**  $\delta$  7.98 – 7.89 (m, 2H), 7.81 – 7.74 (m, 2H), 7.55 – 7.49 (m, 1H), 7.44–7.42 (m, 2H), 7.39 – 7.32 (m, 1H), 1.36 (s, 9H).  **$^{13}\text{C}$  NMR (101 MHz,  $\text{CDCl}_3$ )**  $\delta$  167.42, 152.26, 151.06, 134.28, 131.75, 131.28, 128.65, 126.10, 126.00, 125.24, 123.84, 123.62, 34.80, 34.67, 31.25, 31.21. **IR (v,  $\text{cm}^{-1}$ )** 1754, 1720, 1428, 1115, 1078, 871, 724. **HRMS  $m/z$  (ESI):** calcd for  $\text{C}_{18}\text{H}_{17}\text{NNaO}_2$  ( $\text{M} + \text{Na}$ )<sup>+</sup> 302.1157, found 302.1153.

**2-(2-Methoxyphenyl)isoindoline-1,3-dione (3eaa), 2-(3-methoxyphenyl)isoindoline-1,3-dione (3eab), and 2-(4-methoxyphenyl)isoindoline-1,3-dione(3eac)<sup>[2]</sup>**

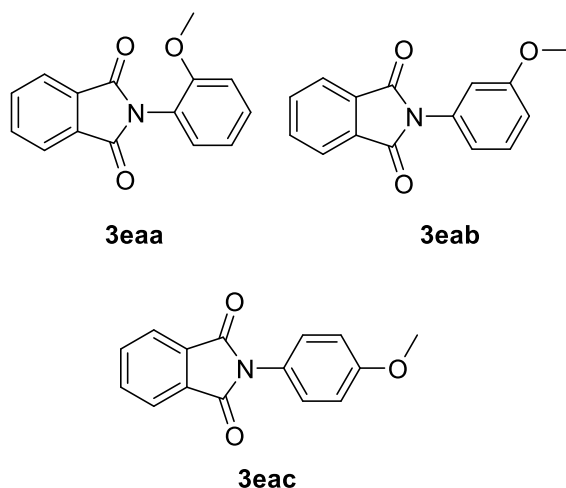

Following the general procedure, the reaction of *N*-hydroxyphthalimide (1.0 equiv., 0.1 mmol, 16.3 mg), Fe(OTf)<sub>3</sub> (30 mol%, 0.03 mmol, 15.1 mg), trimethyl phosphite (10.0 equiv., 1.0 mmol, 124.1 mg) in anisole (2 mL) at 70 °C under air for 24 h. The crude product was purified by column chromatography

on silica gel to afford **3ea** (16.5 mg, 65%, **3eaa**:**3eab**:**3eac** = 13:1:12) as a white solid. The isomer ratio was determined by <sup>1</sup>H NMR spectroscopy. <sup>1</sup>H NMR (400 MHz, CDCl<sub>3</sub>) δ 7.93 (dd, *J* = 5.5, 3.1 Hz, 2H), 7.77 (dt, *J* = 5.6, 2.8 Hz, 2H), 7.43 (td, *J* = 7.9, 1.7 Hz, 1H [**3eaa**]), 7.36 – 7.29 (m, 1H), 7.25 (d, *J* = 3.1 Hz, 1H), 7.11 – 6.98 (m, 2H), 3.84 (s, 3H [**3eac**]), 3.83 (s, 3H [**3eab**]), 3.79 (s, 3H [**3eaa**]). <sup>13</sup>C NMR (151 MHz, CDCl<sub>3</sub>) δ 167.56, 167.35, 159.28, 155.86, 134.28, 134.07, 132.31, 131.85, 130.65, 129.99, 127.93, 124.30, 123.65, 120.86, 120.33, 114.49, 112.17, 55.83, 55.50. IR (ν, cm<sup>-1</sup>) 1734, 1708, 1512, 1386, 1113, 1024, 883, 715. HRMS *m/z* (ESI): calcd for C<sub>15</sub>H<sub>11</sub>NNaO<sub>3</sub> (M + Na)<sup>+</sup> 276.0637, found 276.0631.

### 2-(3-(Trifluoromethyl)phenyl)isoindoline-1,3-dione (**3fa**)<sup>[2]</sup>

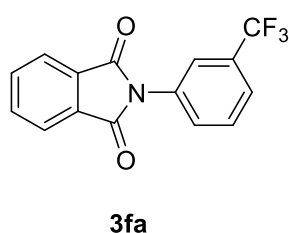

Following the general procedure, the reaction of *N*-hydroxyphthalimide (1.0 equiv., 0.1 mmol, 16.3 mg), Fe(OTf)<sub>3</sub> (30 mol%, 0.03 mmol, 15.1 mg), trimethyl phosphate (6.0 equiv., 0.6 mmol, 74.4 mg) in trifluorotoluene (2 mL) at 70 °C under air for 24 h. The crude product was

purified by column chromatography on silica gel to afford **3fa** (17.8 mg, 60%) as a white solid. <sup>1</sup>H NMR (400 MHz, CDCl<sub>3</sub>) δ 8.01 – 7.94 (m, 2H), 7.84 – 7.79 (m, 2H), 7.79 – 7.60 (m, 4H). <sup>13</sup>C NMR (101 MHz, CDCl<sub>3</sub>) δ 165.34, 135.33, 132.28, 131.72, 131.40, 129.63, 126.40, 126.14, 124.93, 124.69, 123.95, 123.36, 122.21. <sup>19</sup>F NMR (376 MHz, CDCl<sub>3</sub>) δ -62.46. IR (ν, cm<sup>-1</sup>) 1735, 1712, 1512, 1388, 1323, 1012, 1069, 805,

714. **HRMS m/z (ESI)**: calcd for C<sub>15</sub>H<sub>8</sub>F<sub>3</sub>NNaO<sub>2</sub> (M + Na)<sup>+</sup> 314.0405, found 314.0397.

**2-(2-Fluorophenyl)isoindoline-1,3-dione (3gaa), 2-(3-fluorophenyl)isoindoline-1,3-dione (3gab), and 2-(4-fluorophenyl)isoindoline-1,3-dione (3gac)**<sup>[2]</sup>

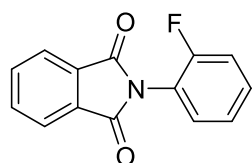

**3gaa**

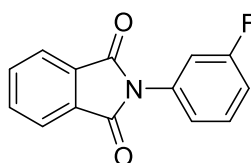

**3gab**

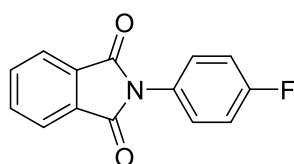

**3gac**

Following the general procedure, the reaction of *N*-hydroxyphthalimide (1.0 equiv., 0.1 mmol, 16.3 mg), Fe(OTf)<sub>3</sub> (30 mol%, 0.03 mmol, 15.1 mg), trimethyl phosphite (10.0 equiv., 1.0 mmol, 124.1 mg) in fluorobenzene (2 mL) at 70 °C under air for 24 h. The crude product was purified by column chromatography on silica gel to afford

**3ga** (14.7 mg, 61%, **3gaa:3gab:3gac** = 1:5:2) as a white solid. The isomer ratio was determined by <sup>19</sup>F NMR spectroscopy. **<sup>1</sup>H NMR (400 MHz, CDCl<sub>3</sub>)** δ 7.98 – 7.90 (m, 2H), 7.83 – 7.74 (m, 2H), 7.53 – 7.32 (m, 2H [**3gaa+3gab**]), 7.31 – 7.15 (m, 2H), 7.14 – 7.06 (m, 1H [**3gac**]). **<sup>13</sup>C NMR (101 MHz, CDCl<sub>3</sub>)** δ 167.80, 166.83, 166.50, 134.59, 134.49, 134.44, 131.94, 131.63, 131.54, 130.75, 130.67, 130.23, 130.13, 129.85, 128.40, 128.31, 124.64, 124.60, 123.92, 123.89, 123.80, 122.00, 121.97, 116.85, 116.65, 116.23, 116.00, 115.10, 114.89, 114.04, 113.79. **<sup>19</sup>F NMR (376 MHz, CDCl<sub>3</sub>)** δ -111.17 [**3gab**], -113.06 [**3gac**], -118.68 [**3gaa**]. **IR (ν, cm<sup>-1</sup>)** 1746, 1713, 1594, 1387, 1109, 1086, 857, 715. **HRMS m/z (ESI)**: calcd for C<sub>14</sub>H<sub>8</sub>FNNaO<sub>2</sub> (M + Na)<sup>+</sup> 264.0437, found 264.0429.

**2-(2-Chlorophenyl)isoindoline-1,3-dione (3haa), 2-(3-chlorophenyl)isoindoline-1,3-dione (3hab), and 2-(4-chlorophenyl)isoindoline-1,3-dione (3hac)**<sup>[2]</sup>



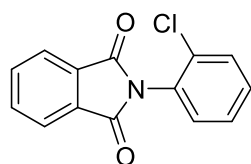

**3haa**

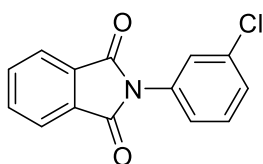

**3hab**

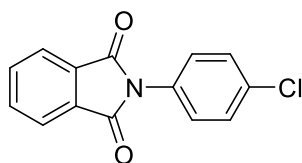

**3hac**

Following the general procedure, the reaction of *N*-hydroxyphthalimide (1.0 equiv., 0.1 mmol, 16.3 mg), Fe(OTf)<sub>3</sub> (30 mol%, 0.03 mmol, 15.1 mg), trimethyl phosphite (6.0 equiv., 0.6 mmol, 74.4 mg) in chlorobenzene (2 mL) at 70 °C under air for 24 h. The crude product was purified by column chromatography on silica gel to afford

**3ha** (12.9 mg, 50%, **3haa:3hab:3hac** = 1:4:2) as a white solid. The isomer ratio was determined by <sup>1</sup>H NMR spectroscopy. <sup>1</sup>H NMR (400 MHz, CDCl<sub>3</sub>) δ 7.97 – 7.94 (m, 2H), 7.85 – 7.75 (m, 2H), 7.57 (dt, *J* = 6.0, 2.1 Hz, 2H [**3haa**]), 7.51 – 7.47 (m, 2H [**3hac**]), 7.47 – 7.31 (m, 2H [**3haa**] + 2H [**3hac**] + 4H [**3hac**]). <sup>13</sup>C NMR (101 MHz, CDCl<sub>3</sub>) δ 166.97, 166.66, 166.46, 134.60, 134.55, 134.45, 133.83, 133.47, 130.64, 130.43, 130.18, 130.01, 129.30, 128.24, 127.71, 127.65, 126.67, 125.01, 123.95, 123.90, 123.85. IR (ν, cm<sup>-1</sup>) 1730, 1713, 1495, 1386, 1120, 1015, 885, 715. HRMS *m/z* (ESI): calcd for C<sub>14</sub>H<sub>8</sub>ClNNaO<sub>2</sub> (M + Na)<sup>+</sup> 280.0141, found 280.0132.

### 2-(2-Bromophenyl)isoindoline-1,3-dione (**3iaa**), 2-(3-bromophenyl)isoindoline-1,3-dione (**3iab**), and 2-(4-bromophenyl)isoindoline-1,3-dione (**3iac**)<sup>[2]</sup>

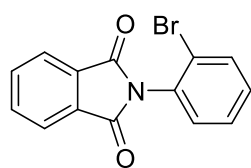

**3iaa**

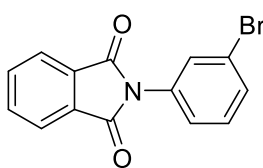

**3iab**

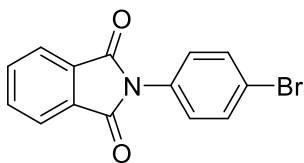

**3iac**

Following the general procedure, the reaction of *N*-hydroxyphthalimide (1.0 equiv., 0.1 mmol, 16.3 mg), Fe(OTf)<sub>3</sub> (30 mol%, 0.03 mmol, 15.1 mg), trimethyl phosphite (10.0 equiv., 1.0 mmol, 124.1 mg) in bromobenzene (2 mL) at 70 °C under air for 24 h. The crude product was purified by column chromatography on silica gel to afford

**3ia** (15.4 mg, 51%, **3iab**:**3iac** = 1:6) as a white solid. The isomer ratio was determined by <sup>1</sup>H NMR spectroscopy. <sup>1</sup>H NMR (400 MHz, CDCl<sub>3</sub>) δ 7.99 – 7.92 (m, 2H), 7.83 – 7.76 (m, 2H), 7.64 – 7.61 (m, 2H [**3iab**]), 7.56 – 7.49 (m, 2H [**3iac**]), 7.44 – 7.34 (m, 2H). <sup>13</sup>C NMR (101 MHz, CDCl<sub>3</sub>) δ 166.90, 134.61, 134.57, 132.27, 131.59, 131.12, 130.72, 130.28, 129.86, 127.31, 125.52, 123.90, 123.86, 122.21. IR (ν, cm<sup>-1</sup>) 1732, 1711, 1493, 1386, 1119, 1081, 850, 715. HRMS m/z (ESI): calcd for C<sub>14</sub>H<sub>8</sub>BrNNaO<sub>2</sub> (M + Na)<sup>+</sup> 323.9636, found 323.9628.

**2-(2-(Chloromethyl)phenyl)isoindoline-1,3-dione (3jaa)**, **2-(3-(chloromethyl)phenyl)isoindoline-1,3-dione (3jab)**, and **2-(4-(chloromethyl)phenyl)isoindoline-1,3-dione (3jac)** <sup>[5]</sup>

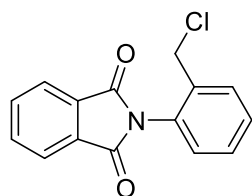

**3jaa**

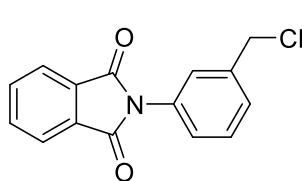

**3jab**

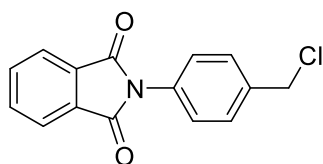

**3jac**

Following the general procedure, the reaction of *N*-hydroxyphthalimide (1.0 equiv., 0.1 mmol, 16.3 mg), Fe(OTf)<sub>3</sub> (30 mol%, 0.03 mmol, 15.1 mg), trimethyl phosphite (10.0 equiv., 1.0 mmol, 124.1 mg) in benzyl chloride (2 mL) at 70 °C under air for 24 h. The crude product was purified by column chromatography on silica

gel to afford **3ja** (11.4 mg, 42%, **3jaa**:**3jab**:**3jac** = 1:2:3) as a white solid. The isomer ratio was determined by <sup>1</sup>H NMR spectroscopy. <sup>1</sup>H NMR (400 MHz, CDCl<sub>3</sub>) δ 7.98 – 7.04 (m, 2H), 7.82 – 7.79 (m, 2H), 7.59 – 7.25 (m, 4H), 4.63 (s, 2H [**3jab**]), 4.62 (s, 2H [**3jaa**]), 4.53 (s, 2H [**3jac**]). <sup>13</sup>C NMR (151 MHz, CDCl<sub>3</sub>) δ 167.22, 167.06, 138.54, 137.19, 135.62, 134.48, 132.04, 131.91, 131.68, 131.66, 130.69, 130.62, 129.73, 129.68, 129.65, 129.43, 129.28, 128.07, 126.65, 126.50, 126.36, 123.93, 123.79, 45.51, 42.84. IR (ν, cm<sup>-1</sup>) 1739, 1717, 1380, 1110, 1077, 875, 718. HRMS m/z (ESI): calcd for C<sub>15</sub>H<sub>10</sub>ClNNaO<sub>2</sub> (M + Na)<sup>+</sup> 294.0298, found 294.0292.

**2-(2-(Bromomethyl)phenyl)isoindoline-1,3-dione (3kaa), 2-(3-(bromomethyl)phenyl)isoindoline-1,3-dione (3kab), and 2-(4-(bromomethyl)phenyl)isoindoline-1,3-dione (3kac)** <sup>[6]</sup>

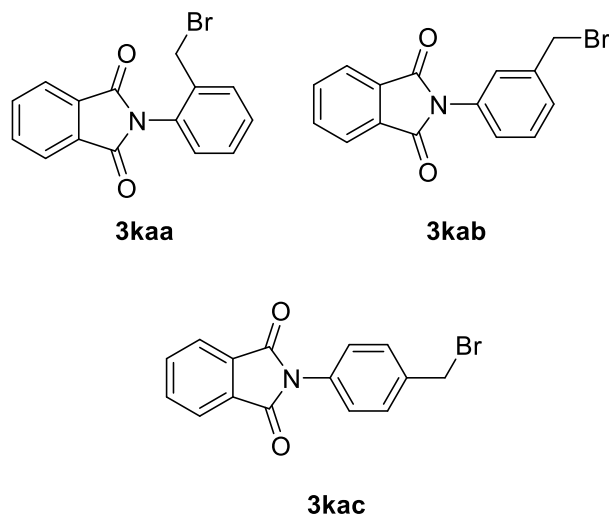

Following the general procedure, the reaction of *N*-hydroxyphthalimide (1.0 equiv., 0.1 mmol, 16.3 mg), Fe(OTf)<sub>3</sub> (30 mol%, 0.03 mmol, 15.1 mg), trimethyl phosphite (10.0 equiv., 1.0 mmol, 124.1 mg) in benzyl bromide (2 mL) at 70 °C under air for 24 h. The crude product was purified by column chromatography on silica

gel to afford **3ka** (17.9 mg, 57%, **3kaa:3kab:3kac** = 1:3:5) as a white solid. The isomer ratio was determined by <sup>1</sup>H NMR spectroscopy. <sup>1</sup>H NMR (400 MHz, CDCl<sub>3</sub>) δ 8.00 – 7.91 (m, 2H), 7.82 – 7.78 (m, 2H), 7.58 – 7.24 (m, 4H), 4.52 (s, 2H [**3kab**]), 4.51 (s, 2H [**3kaa**]), 4.42 (s, 2H [**3kac**]). <sup>13</sup>C NMR (151 MHz, CDCl<sub>3</sub>) δ 167.22, 167.06, 138.54, 137.19, 135.62, 134.48, 132.04, 131.91, 131.68, 131.66, 130.69, 130.62, 129.73, 129.68, 129.65, 129.43, 129.28, 128.07, 126.65, 126.50, 126.36, 123.93, 123.79, 44.71, 42.32. IR (ν, cm<sup>-1</sup>) 1760, 1721, 1379, 1110, 1053, 876, 716. HRMS *m/z* (ESI): calcd for C<sub>15</sub>H<sub>10</sub>BrNNaO<sub>2</sub> (M + Na)<sup>+</sup> 337.9793, found 337.9788.

**2-(2,3-Dimethylphenyl)isoindoline-1,3-dione (3laa) and 2-(3,4-dimethylphenyl)isoindoline-1,3-dione (3lab)** <sup>[2]</sup>

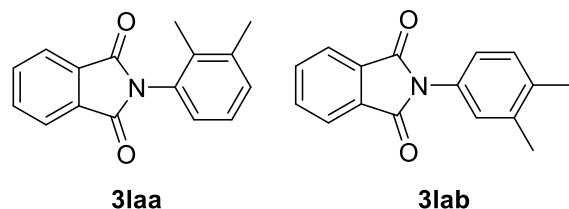

Following the general procedure, the reaction of *N*-hydroxyphthalimide (1.0 equiv., 0.1 mmol, 16.3 mg), Fe(OTf)<sub>3</sub> (30 mol%, 0.03 mmol, 15.1 mg),

trimethyl phosphite (6.0 equiv., 0.6 mmol, 74.4 mg) in *o*-xylene (2 mL) at 70 °C under air for 24 h. The crude product was purified by column chromatography on silica gel to

afford **3la** (21.3 mg, 85%, **3laa:3lab** = 1:1) as a white solid. The isomer ratio was determined by  $^1\text{H}$  NMR spectroscopy.  $^1\text{H}$  NMR (400 MHz,  $\text{CDCl}_3$ )  $\delta$  7.96 – 7.92 (m, 2H), 7.84 – 7.71 (m, 2H), 7.28 – 7.19 (m, 2H [**3laa**] + 1H [**3lab**]), 7.17 (d,  $J$  = 2.2 Hz, 1H [**3lab**]), 7.14 – 7.12 (m, 1H [**3lab**]), 7.06 (d,  $J$  = 1.6 Hz, 1H [**3laa**]), 2.35 (s, 3H [**3laa**]), 2.30 (d,  $J$  = 2.9 Hz, 6H [**3lab**]), 2.08 (s, 3H [**3laa**]).  $^{13}\text{C}$  NMR (151 MHz,  $\text{CDCl}_3$ )  $\delta$  167.51, 137.61, 137.01, 134.25, 131.90, 131.41, 130.25, 128.71, 127.74, 126.26, 124.13, 123.73, 20.39, 19.85, 19.49, 14.62. IR ( $\text{v, cm}^{-1}$ ) 1771, 1716, 1377, 1107, 1084, 872, 715. HRMS  $m/z$  (ESI): calcd for  $\text{C}_{16}\text{H}_{13}\text{NNaO}_2$  ( $\text{M} + \text{Na}$ ) $^+$  274.0844, found 274.0832.

### 2-(3,4-Dichlorophenyl)isoindoline-1,3-dione (**3ma**)<sup>[7]</sup>

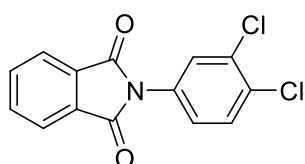

**3ma**

Following the general procedure, the reaction of *N*-hydroxyphthalimide (1.0 equiv., 0.1 mmol, 16.3 mg),  $\text{Fe}(\text{OTf})_3$  (30 mol%, 0.03 mmol, 15.1 mg), trimethyl phosphite (6.0 equiv., 0.6 mmol, 74.4 mg) in *o*-dichlorobenzene (2 mL) at 70 °C under air for 24 h. The crude product was purified by column chromatography on silica gel to afford **3ma** (9.6 mg, 33%) as a white solid.  $^1\text{H}$  NMR (400 MHz,  $\text{CDCl}_3$ )  $\delta$  8.00 – 7.91 (m, 2H), 7.86 – 7.77 (m, 2H), 7.63 (dd,  $J$  = 2.4, 0.9 Hz, 1H), 7.57 (d,  $J$  = 8.6 Hz, 1H), 7.37 (ddd,  $J$  = 8.6, 2.4, 0.9 Hz, 1H).  $^{13}\text{C}$  NMR (151 MHz,  $\text{CDCl}_3$ )  $\delta$  166.60, 134.73, 133.01, 132.10, 131.45, 131.09, 130.67, 128.14, 125.50, 123.98. IR ( $\text{v, cm}^{-1}$ ) 1774, 1711, 1379, 1112, 1079, 869, 715. HRMS  $m/z$  (ESI): calcd for  $\text{C}_{14}\text{H}_9\text{NaO}_2$  ( $\text{M} + \text{Na}$ ) $^+$  313.9752, found 313.9791.

2-(2,6-Dimethylphenyl)isoindoline-1,3-dione (**3naa**), 2-(2,4-dimethylphenyl)isoindoline-1,3-dione (**3nab**), and 2-(3,5-dimethylphenyl)isoindoline-1,3-dione (**3nac**)<sup>[2]</sup>

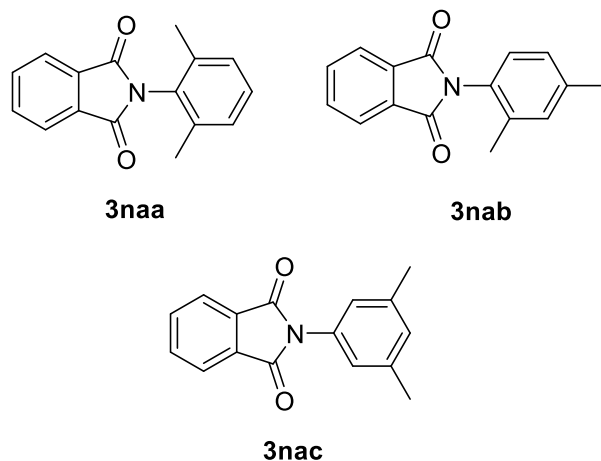

Following the general procedure, the reaction of *N*-hydroxyphthalimide (1.0 equiv., 0.1 mmol, 16.3 mg), Fe(OTf)<sub>3</sub> (30 mol%, 0.03 mmol, 15.1 mg), trimethyl phosphite (6.0 equiv., 0.6 mmol, 74.4 mg) in *m*-xylene (2 mL) at 70 °C under air for 24 h. The crude product was purified by column

chromatography on silica gel to afford **3na** (22.6 mg, 90%, **3naa:3nab:3nac** = 6:11:1) as a white solid. The isomer ratio was determined by <sup>1</sup>H NMR spectroscopy. <sup>1</sup>H NMR (600 MHz, CDCl<sub>3</sub>) δ 7.97 – 7.94 (m, 2H), 7.81 – 7.78 (m, 2H), 7.29–7.26 (m, 1H [**3naa**]), 7.19–7.12 (m, 2H [**3naa**] + 1H [**3nab**]), 7.15 – 7.11 (m, 1H [**3nab**]), 7.08 (d, *J* = 7.8 Hz, 1H [**3nab**]), 7.05 (s, 1H [**3nac**]), 7.02 (s, 2H [**3nac**]), 2.38 (s, 3H [**3nab**], 6H [**3nac**]), 2.16 (d, *J* = 2.1 Hz, 6H [**3naa**], 3H [**3nab**]). <sup>13</sup>C NMR (101 MHz, CDCl<sub>3</sub>) δ 167.51, 167.21, 139.95, 139.01, 137.36, 136.12, 134.31, 134.23, 132.04, 131.96, 131.86, 130.80, 130.09, 129.44, 129.05, 128.45, 128.42, 127.83, 127.60, 124.48, 123.75, 123.69, 21.27, 20.71, 18.04, 17.90. IR (ν, cm<sup>-1</sup>) 1780, 1723, 1377, 1108, 1084, 883, 723. HRMS *m/z* (ESI): calcd for C<sub>16</sub>H<sub>13</sub>NNaO<sub>2</sub> (M + Na)<sup>+</sup> 274.0844, found 274.0840.

### 2-(5-Chloro-2-methylphenyl)isoindoline-1,3-dione (**3oaa**)<sup>[8]</sup> and 2-(2-chloro-5-methylphenyl)isoindoline-1,3-dione (**3oab**)

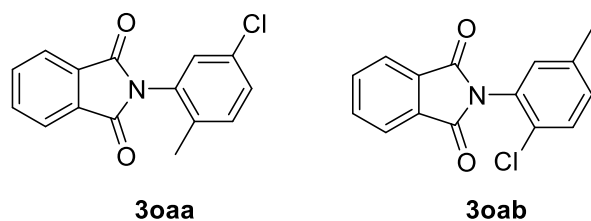

Following the general procedure, the reaction of *N*-hydroxyphthalimide (1.0 equiv., 0.1 mmol, 16.3 mg), Fe(OTf)<sub>3</sub> (30 mol%, 0.03 mmol, 15.1 mg), trimethyl phosphite (6.0 equiv., 0.6 mmol, 74.4 mg) in *p*-chlorotoluene (2 mL) at 70 °C

under air for 24 h. The crude product was purified by column chromatography on silica gel to afford **3oa** (17.1 mg, 63%, **3oaa:3oab** = 1:1) as a white solid. The isomer ratio

was determined by  $^1\text{H}$  NMR spectroscopy.  $^1\text{H}$  NMR (400 MHz,  $\text{CDCl}_3$ )  $\delta$  7.99 – 7.91 (m, 2H), 7.80 – 7.77 (m, 2H), 7.28 – 7.21 (m, 2H), 7.18 – 7.16 (m, 1H [3oaa]), 7.01 (s, 1H [3oab]), 2.35 (s, 3H [3oab]), 2.15 (s, 3H [3oaa]).  $^{13}\text{C}$  NMR (101 MHz,  $\text{CDCl}_3$ )  $\delta$  166.91, 135.19, 134.51, 133.90, 132.07, 131.92, 131.80, 131.26, 129.54, 128.85, 123.90, 18.39, 17.62. IR (v,  $\text{cm}^{-1}$ ) 1766, 1726, 1374, 1111, 1074, 889, 718. HRMS  $m/z$  (ESI): calcd for  $\text{C}_{15}\text{H}_{10}\text{ClNNaO}_2$  ( $\text{M} + \text{Na}$ ) $^+$  294.0298, found 294.0290.

### 2-(2,5-Dimethylphenyl)isoindoline-1,3-dione (3pa)<sup>[2]</sup>

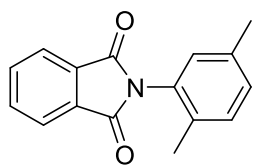

**3pa**

Following the general procedure, the reaction of *N*-hydroxyphthalimide (1.0 equiv., 0.1 mmol, 16.3 mg),  $\text{Fe}(\text{OTf})_3$  (30 mol%, 0.03 mmol, 15.1 mg), trimethyl phosphite (6.0 equiv., 0.6 mmol, 74.4 mg) in *p*-xylene (2 mL) at 70 °C under air for 24

h. The crude product was purified by column chromatography on silica gel to afford **3pa** (23.6 mg, 94%) as a white solid.  $^1\text{H}$  NMR (600 MHz,  $\text{CDCl}_3$ )  $\delta$  7.97 – 7.93 (m, 2H), 7.80–7.77 (m, 2H), 7.26 – 7.23 (m, 1H), 7.18 (d,  $J = 8.0$  Hz, 1H), 7.02 (s, 1H), 2.36 (s, 3H), 2.16 (s, 3H).  $^{13}\text{C}$  NMR (101 MHz,  $\text{CDCl}_3$ )  $\delta$  166.79, 136.61, 134.22, 133.19, 131.95, 130.86, 130.24, 129.08, 123.64, 20.74, 17.47. IR (v,  $\text{cm}^{-1}$ ) 1775, 1718, 1370, 1112, 1082, 873, 718. HRMS  $m/z$  (ESI): calcd for  $\text{C}_{16}\text{H}_{13}\text{NNaO}_2$  ( $\text{M} + \text{Na}$ ) $^+$  274.0844, found 274.0836.

### 2-Mesitylisoindoline-1,3-dione (3qa)<sup>[2]</sup>

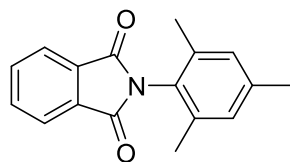

**3qa**

Following the general procedure, the reaction of *N*-hydroxyphthalimide (1.0 equiv., 0.1 mmol, 16.3 mg),  $\text{Fe}(\text{OTf})_3$  (30 mol%, 0.03 mmol, 15.1 mg), trimethyl phosphite (6.0 equiv., 0.6 mmol, 74.4 mg) in mesitylene (2 mL) at 70 °C under air for 24 h. The crude product was purified by column chromatography on silica gel to afford **3qa** (17.8 mg, 67%) as a white solid.  $^1\text{H}$  NMR (600 MHz,  $\text{CDCl}_3$ )  $\delta$  7.98 – 7.95(m, 2H), 7.83 – 7.77 (m, 2H), 7.01 (s, 2H), 2.34 (s, 3H), 2.12 (s, 6H).  $^{13}\text{C}$  NMR (101 MHz,  $\text{CDCl}_3$ )  $\delta$  166.75, 139.33, 136.41, 134.23, 132.42, 129.67, 127.00,

123.69, 21.09, 17.92. **IR** ( $\nu$ ,  $\text{cm}^{-1}$ ) 1779, 1723, 1375, 1113, 1083, 882, 718. **HRMS**  $m/z$  (**ESI**): calcd for  $\text{C}_{17}\text{H}_{15}\text{NNaO}_2$  ( $M + \text{Na}$ )<sup>+</sup> 288.1000, found 288.0995.

### 2-(Furan-2-yl)isoindoline-1,3-dione (**3ra**)<sup>[7]</sup>

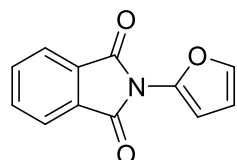

**3ra**

Following the general procedure, the reaction of *N*-hydroxyphthalimide (1.0 equiv., 0.1 mmol, 16.3 mg),  $\text{Fe}(\text{OTf})_3$  (30 mol%, 0.03 mmol, 15.1 mg), trimethyl phosphite (6.0 equiv., 0.6 mmol, 74.4 mg) in furan (2 mL) at 70 °C under air for 24 h. The crude product was purified by column chromatography on silica gel to afford **3ra** (8.7 mg, 41%) as a light yellow solid. **<sup>1</sup>H NMR** (600 MHz,  $\text{CDCl}_3$ )  $\delta$  7.99-7.96 (m, 2H), 7.85 – 7.80 (m, 2H), 7.47 (dd,  $J = 2.1, 1.0$  Hz, 1H), 6.55 (dd,  $J = 3.3, 2.1$  Hz, 1H), 6.46 (dd,  $J = 3.4, 1.0$  Hz, 1H). **<sup>13</sup>C NMR** (101 MHz,  $\text{CDCl}_3$ )  $\delta$  166.75, 139.33, 136.41, 134.23, 132.42, 129.67, 127.00, 123.69, 21.09, 17.92. **IR** ( $\nu$ ,  $\text{cm}^{-1}$ ) 1782, 1728, 1388, 1100, 1082, 882, 716. **HRMS**  $m/z$  (**ESI**): calcd for  $\text{C}_{12}\text{H}_7\text{NNaO}_3$  ( $M + \text{Na}$ )<sup>+</sup> 236.0324, found 236.0316.

### 2-(Thiophen-2-yl)isoindoline-1,3-dione (**3sa**)<sup>[7]</sup>

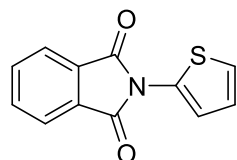

**3sa**

Following the general procedure, the reaction of *N*-hydroxyphthalimide (1.0 equiv., 0.1 mmol, 16.3 mg),  $\text{Fe}(\text{OTf})_3$  (30 mol%, 0.03 mmol, 15.1 mg), trimethyl phosphite (6.0 equiv., 0.6 mmol, 74.4 mg) in thiophene (2 mL) at 70 °C under air for 24 h. The crude product was purified by column chromatography on silica gel to afford **3ra** (7.1 mg, 31%) as a yellow solid. **<sup>1</sup>H NMR** (400 MHz,  $\text{CDCl}_3$ )  $\delta$  7.94 - 9.91 (m, 2H), 7.81 – 7.74 (m, 2H), 7.52 (ddq,  $J = 5.3, 2.7, 1.2$  Hz, 1H), 7.27 – 7.23 (m, 1H), 7.04 (ddt,  $J = 5.4, 3.8, 1.3$  Hz, 1H). **<sup>13</sup>C NMR** (101 MHz,  $\text{CDCl}_3$ )  $\delta$  165.96, 135.58, 133.99, 131.42, 128.39, 125.25, 123.89, 121.91, 120.40, 77.32, 77.00, 76.68. **IR** ( $\nu$ ,  $\text{cm}^{-1}$ ) 1780, 1723, 1377, 1110, 1064, 883, 711. **HRMS**  $m/z$  (**ESI**): calcd for  $\text{C}_{12}\text{H}_7\text{NNaO}_2\text{S}$  ( $M + \text{Na}$ )<sup>+</sup> 252.0095, found 252.0084.

#### 4-Chloro-2-phenylisoindoline-1,3-dione (**3ab**)<sup>[1], [9]</sup>

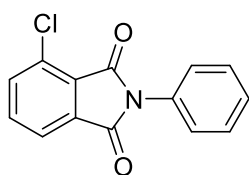

**3ab**

Following the general procedure, the reaction of 4-chloro-2-hydroxyisoindoline-1,3-dione (1.0 equiv., 0.1 mmol, 19.7 mg), Fe(OTf)<sub>3</sub> (30 mol%, 0.03 mmol, 15.1 mg), trimethyl phosphite (6.0 equiv., 0.6 mmol, 74.4 mg) in benzene (2 mL) at 70 °C under air for 12 h. The crude product was purified by column chromatography on silica gel to afford **3ab** (20.8 mg, 81%) as a white solid. <sup>1</sup>H NMR (400 MHz, CDCl<sub>3</sub>) δ 7.86 (dd, *J* = 4.7, 3.5 Hz, 1H), 7.75 – 7.66 (m, 2H), 7.54 – 7.46 (m, 2H), 7.42 (dt, *J* = 8.2, 2.0 Hz, 3H). <sup>13</sup>C NMR (101 MHz, CDCl<sub>3</sub>) δ 165.82, 164.82, 136.12, 135.25, 133.84, 131.89, 131.32, 129.11, 128.29, 127.37, 126.55, 122.22. IR (ν, cm<sup>-1</sup>) 1762, 1713, 1378, 1112, 1070, 869, 737. HRMS *m/z* (ESI): calcd for C<sub>14</sub>H<sub>8</sub>ClNNaO<sub>2</sub> (M + Na)<sup>+</sup> 280.0141, found 280.0132.

#### 5-Chloro-2-phenylisoindoline-1,3-dione (**3ac**)<sup>[1], [10]</sup>

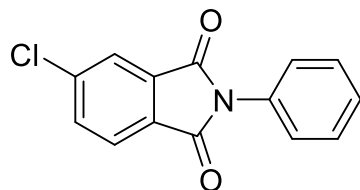

**3ca**

Following the general procedure, the reaction of 5-chloro-2-hydroxyisoindoline-1,3-dione (1.0 equiv., 0.1 mmol, 19.7 mg), Fe(OTf)<sub>3</sub> (30 mol%, 0.03 mmol, 15.1 mg), trimethyl phosphite (6.0 equiv., 0.6 mmol, 74.4 mg) in benzene (2 mL) at 70 °C under air for 12 h. The crude product was purified by column chromatography on silica gel to afford **3ac** (20.0 mg, 78%) as a white solid. <sup>1</sup>H NMR (400 MHz, CDCl<sub>3</sub>) δ 7.97 – 7.84 (m, 2H), 7.73 (dd, *J* = 7.9, 1.8 Hz, 1H), 7.54 – 7.45 (m, 2H), 7.45 – 7.36 (m, 3H). <sup>13</sup>C NMR (101 MHz, CDCl<sub>3</sub>) δ 166.29, 165.97, 141.10, 134.46, 133.40, 131.39, 129.78, 129.15, 128.29, 126.45, 125.00, 124.14. IR (ν, cm<sup>-1</sup>) 1781, 1715, 1387, 1118, 1068, 846, 739. HRMS *m/z* (ESI): calcd for C<sub>14</sub>H<sub>8</sub>ClNNaO<sub>2</sub> (M + Na)<sup>+</sup> 280.0141, found 280.0133.

#### 5-Bromo-2-phenylisoindoline-1,3-dione (**3ad**)<sup>[1], [11]</sup>

Following the general procedure, the reaction of 5-bromo-2-hydroxyisoindoline-1,3-



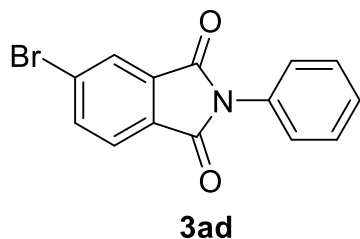

dione (1.0 equiv., 0.1 mmol, 19.7 mg), Fe(OTf)<sub>3</sub> (30 mol%, 0.03 mmol, 15.1 mg), trimethyl phosphite (6.0 equiv., 0.6 mmol, 74.4 mg) in benzene (2 mL) at 70 °C under air for 12 h. The crude product was purified by column chromatography on silica gel to afford **3ad** (25.6

mg, 85%) as a white solid. <sup>1</sup>H NMR (400 MHz, CDCl<sub>3</sub>) δ 8.05 (s, 1H), 7.90 (dd, *J* = 8.0, 1.7 Hz, 1H), 7.79 (d, *J* = 7.9 Hz, 1H), 7.49 (dd, *J* = 8.6, 7.0 Hz, 2H), 7.40 (d, *J* = 7.8 Hz, 3H). <sup>13</sup>C NMR (101 MHz, CDCl<sub>3</sub>) δ 166.43, 165.05, 138.01, 133.34, 131.36, 130.24, 129.30, 128.28, 127.06, 126.44, 124.93, 77.37, 77.05, 76.73. IR (ν, cm<sup>-1</sup>) 1777, 1719, 1384, 1247, 1067, 843, 735. HRMS *m/z* (ESI): calcd for C<sub>14</sub>H<sub>8</sub>BrNNaO<sub>2</sub> (M + Na)<sup>+</sup> 323.9636, found 323.9629.

## 5. The Theoretical Regioselectivity Calculations

Density functional theory (DFT) calculations were carried out to elaborate the regioselectivity of the Fe-catalyzed direct C–H amination of arenes with *N*-hydroxyphthalimide using GAUSSIAN 09 software.<sup>[12]</sup> B3LYP-D3<sup>[13]</sup> functional combined with 6-31G\*<sup>[14]</sup> basis set were implemented for optimization of all geometries (no imaginary frequency) and frequency computations (one imaginary frequency). All the stationary points and the thermal correction to free energies at 298.15 K and 1 atm were also identified at this level of theory. Furthermore, single-point solvation energy was calculated by B3LYP-D3 functional and 6-311+G (d,p)<sup>[15]</sup> basis set as well as continuum model SMD<sup>[16]</sup> (benzene as solvent).

**Table S1. The calculated energies for the regioselectivity of the reaction**

| Product                                                                                                                   | TS-o                                                                                                    | TS-m                                                                                                     | TS-p                                                                                                      |
|---------------------------------------------------------------------------------------------------------------------------|---------------------------------------------------------------------------------------------------------|----------------------------------------------------------------------------------------------------------|-----------------------------------------------------------------------------------------------------------|
| 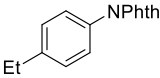<br><b>3ba</b> ( <i>o/p</i> = 1/7)       | <br>5.5 (2.4)          | <br><b>6.4</b> (2.6)   | <br>4.8 (1.4)          |
| <br><b>3ea</b> ( <i>o/m/p</i> = 13/1/12) | <br><b>3.3</b> (0.9)   | <br><b>3.8</b> (0.6)   | <br>3.5 (1.0)          |
| <br><b>3fa</b> ( <i>m</i> )              | <br><b>8.5</b> (3.9)   | <br><b>7.3</b> (3.8)   | <br>7.6 (4.4)          |
| <br><b>3ia</b> ( <i>o/m/p</i> = 0/1/6)  | <br>6.2 (3.2)         | <br>6.2 (3.4)         | <br><b>6.0</b> (3.3) |
| <br><b>3ka</b> ( <i>o/m/p</i> = 1/3/5) | <br><b>8.5</b> (2.7) | <br>6.2 (2.4)        | <br><b>5.9</b> (3.6) |
| <br><b>3ma</b> ( <i>m</i> )            | <br><b>6.4</b> (4.0) | <br><b>5.9</b> (3.4) |                                                                                                           |

Note: For the ratio of the selectivity and the relative free energies, the best one is marked in blue, the second one in black, the last one in red. The energies listed inside the brackets was calculated by B3LYP-D3/6-31G\* level and the energies listed outside the brackets was calculated by B3LYP-D3/6-311(d,p)/SMD level.

**Table S2. The calculated energies of stationary points (in Hartree/Particle), and vibrational frequencies of transitions states (in  $\text{cm}^{-1}$ )**

|          | G <sub>gas</sub> | E <sub>ele</sub> | E <sub>0</sub> | E            | H            | G            |
|----------|------------------|------------------|----------------|--------------|--------------|--------------|
| 7        | -1159.194999     | -1159.683851     | -1159.490461   | -1159.473849 | -1159.472905 | -1159.536398 |
| 8        | -512.330595      | -512.560421      | -512.458804    | -512.450745  | -512.449801  | -512.493395  |
| 9        | -646.855177      | -647.110741      | -647.022964    | -647.015079  | -647.014135  | -647.055682  |
| 1a       | -232.175592      | -232.324415      | -232.223619    | -232.219230  | -232.218286  | -232.251084  |
| TS10     | -744.501303      | -744.895621      | -744.691870    | -744.678474  | -744.677530  | -744.735035  |
| 10       | -744.529764      | -744.926535      | -744.720407    | -744.707325  | -744.706381  | -744.761944  |
| 11       | -744.290781      | -744.722361      | -744.514884    | -744.501761  | -744.500817  | -744.556964  |
| TS12     | -744.285811      | -744.713429      | -744.509345    | -744.496904  | -744.495960  | -744.549014  |
| 12       | 744.328114       | -744.759975      | -744.550510    | -744.537785  | -744.536841  | -744.590296  |
| 1b       | -310.759485      | -310.983350      | -310.825706    | -310.818442  | -310.817498  | -310.857732  |
| TS3ba-o  | -823.086200      | -823.558911      | -823.297328    | -823.281416  | -823.280472  | -823.342305  |
| 10-3ba-o | -823.116523      | -823.589038      | -823.325523    | -823.309710  | -823.308766  | -823.370195  |
| TS3ba-m  | -823.085993      | -823.557384      | -823.295948    | -823.280094  | -823.279150  | -823.340943  |
| 10-3ba-m | -823.114253      | -823.585830      | -823.322847    | -823.306831  | -823.305887  | -823.368409  |
| TS3ba-p  | -823.087802      | -823.559428      | -823.297978    | -823.281987  | -823.281043  | -823.343511  |
| 10-3ba-p | -823.115702      | -823.586629      | -823.323591    | -823.307495  | -823.306551  | -823.370559  |
| 1e       | -346.671538      | -346.885570      | -346.751798    | -346.744993  | -346.744049  | -346.782801  |
| TS3ea-o  | -859.000647      | -859.464068      | -859.226419    | -859.210870  | -859.209925  | -859.270893  |
| 10-3ea-o | -859.030817      | -859.493750      | -859.254181    | -859.238596  | -859.237652  | -859.299096  |
| TS3ea-m  | -859.001188      | -859.461748      | -859.224154    | -859.208607  | -859.207662  | -859.270121  |
| 10-3ea-m | -859.026491      | -859.488737      | -859.249600    | -859.234009  | -859.233065  | -859.294388  |
| TS3ea-p  | -859.000571      | -859.463276      | -859.226089    | -859.210501  | -859.209557  | -859.270661  |
| 10-3ea-p | -859.026785      | -859.489203      | -859.249755    | -859.234168  | -859.233224  | -859.294599  |
| 1f       | -569.216959      | -569.478131      | -569.372369    | -569.364503  | -569.363559  | -569.406550  |
| TS3fa-o  | -1081.541418     | -1082.049016     | -1081.839683   | -1081.823051 | -1081.822107 | -1081.886388 |
| 10-3fa-o | -1081.573655     | -1082.082284     | -1081.870885   | -1081.854339 | -1081.853395 | -1081.917502 |
| TS3fa-m  | -1081.541495     | -1082.048373     | -1081.839216   | -1081.822410 | -1081.821466 | -1081.888363 |

|                 |              |              |              |              |              |              |
|-----------------|--------------|--------------|--------------|--------------|--------------|--------------|
| <b>10-3fa-m</b> | -1081.570365 | -1082.080150 | -1081.869128 | -1081.852437 | -1081.851493 | -1081.916721 |
| <b>TS3fa-p</b>  | -1081.540507 | -1082.048313 | -1081.839121 | -1081.822332 | -1081.821387 | -1081.887768 |
| <b>10-3fa-p</b> | -1081.572062 | -1082.081619 | -1081.870419 | -1081.853738 | -1081.852794 | -1081.918741 |
| <b>li</b>       | -2802.994999 | -2805.871894 | -2805.780952 | -2805.775269 | -2805.774325 | -2805.811815 |
| <b>TS3ia-o</b>  | -3315.320499 | -3318.444855 | -3318.250498 | -3318.235937 | -3318.234993 | -3318.295296 |
| <b>10-3ia-o</b> | -3315.352243 | -3318.477480 | -3318.281031 | -3318.266557 | -3318.265613 | -3318.325350 |
| <b>TS3ia-m</b>  | -3315.320144 | -3318.443576 | -3318.249285 | -3318.234669 | -3318.233725 | -3318.295337 |
| <b>10-3ia-m</b> | -3315.348831 | -3318.473920 | -3318.277826 | -3318.263312 | -3318.262367 | -3318.322552 |
| <b>TS3ia-p</b>  | -3315.320278 | -3318.445150 | -3318.250646 | -3318.236145 | -3318.235200 | -3318.295655 |
| <b>10-3ia-p</b> | -3315.350298 | -3318.475378 | -3318.278930 | -3318.264433 | -3318.263489 | -3318.323762 |
| <b>lk</b>       | -2842.288020 | -2845.206413 | -2845.086826 | -2845.079755 | -2845.078811 | -2845.120541 |
| <b>TS3ka-o</b>  | -3354.614311 | -3357.776442 | -3357.553690 | -3357.537780 | -3357.536836 | -3357.600445 |
| <b>10-3ka-o</b> | -3354.647848 | -3357.813804 | -3357.588432 | -3357.572744 | -3357.571799 | -3357.633943 |
| <b>TS3ka-m</b>  | -3354.614773 | -3357.778879 | -3357.555734 | -3357.539800 | -3357.538855 | -3357.604012 |
| <b>10-3ka-m</b> | -3354.642606 | -3357.808462 | -3357.583660 | -3357.567746 | -3357.566801 | -3357.631294 |
| <b>TS3ka-p</b>  | -3354.613833 | -3357.779225 | -3357.556162 | -3357.540207 | -3357.539263 | -3357.604560 |
| <b>10-3ka-p</b> | -3354.646359 | -3357.813072 | -3357.587971 | -3357.572040 | -3357.571095 | -3357.635975 |
| <b>lm</b>       | -1151.383285 | -1151.570756 | -1151.489078 | -1151.482433 | -1151.481489 | -1151.520968 |
| <b>TS3ma-o</b>  | -1663.707491 | -1664.143396 | -1663.958326 | -1663.942764 | -1663.941819 | -1664.004188 |
| <b>10-3ma-o</b> | -1663.739955 | -1664.176430 | -1663.989178 | -1663.973700 | -1663.972756 | -1664.034517 |
| <b>TS3ma-m</b>  | -1663.708432 | -1664.143421 | -1663.958284 | -1663.942701 | -1663.941757 | -1664.004918 |
| <b>10-3ma-m</b> | -1663.737973 | -1664.173975 | -1663.986834 | -1663.971319 | -1663.970375 | -1664.032584 |

Notes: G<sub>gas</sub> was the sum of electronic and thermal free energies in gas phase. E<sub>ele</sub>, E<sub>0</sub>, E, H, and G were the electronic energies, sum of electronic and zero-point energies, sum of electronic and thermal energies, sum of electronic and thermal enthalpies, and sum of electronic and thermal free energies in solvent, respectively.

### Cartesian coordinates of the optimized structures

|          |           |           |           |          |           |           |
|----------|-----------|-----------|-----------|----------|-----------|-----------|
| <b>7</b> |           |           |           | <b>8</b> |           |           |
| C        | -2.253161 | -0.778682 | -0.007428 | C        | -0.143709 | -0.698496 |
| C        | -2.229288 | 0.656974  | -0.124533 | C        | -0.143716 | 0.698501  |
| C        | -3.420286 | 1.391810  | -0.006628 | C        | -1.327912 | 1.428072  |
| C        | -4.611462 | 0.718432  | 0.219926  | C        | -2.523656 | 0.703828  |
| C        | -4.635058 | -0.704479 | 0.337595  | C        | -2.523650 | -0.703839 |
| C        | -3.466913 | -1.444461 | 0.227533  | C        | -1.327899 | -1.428073 |
| H        | -3.391367 | 2.475712  | -0.096875 | H        | -1.313890 | 2.513329  |
| H        | -5.542049 | 1.276144  | 0.310683  | H        | -3.472482 | 1.232722  |
| H        | -5.583133 | -1.208842 | 0.516409  | H        | -3.472471 | -1.232741 |
| H        | -3.474230 | -2.528902 | 0.316041  | H        | -1.313868 | -2.513330 |
| C        | -0.878599 | 1.105871  | -0.361793 | C        | 1.278829  | 1.146894  |
| C        | -0.916408 | -1.298166 | -0.168999 | C        | 1.278844  | -1.146873 |
| O        | -0.395282 | 2.236566  | -0.559478 | O        | 1.701770  | 2.288456  |
| O        | -0.438948 | -2.443325 | -0.167730 | O        | 1.701766  | -2.288455 |
| N        | -0.136731 | -0.107642 | -0.304415 | N        | 2.134520  | -0.000011 |
| O        | 1.178978  | -0.169309 | -0.768523 |          |           |           |
| P        | 2.227873  | -0.486948 | 0.506967  | <b>9</b> |           |           |
| O        | 3.471042  | -0.749889 | -0.592381 | O        | -1.318383 | -0.159822 |
| O        | 2.605348  | 1.015744  | 1.064906  | O        | 1.322547  | -0.157695 |
| C        | 4.750152  | -0.975906 | -0.025062 | C        | -1.716033 | -1.059135 |
| H        | 5.406752  | -1.326479 | -0.828248 | H        | -2.806084 | -1.222845 |
| H        | 5.173872  | -0.055554 | 0.402939  | H        | -1.228164 | -2.046424 |
| H        | 4.727282  | -1.742776 | 0.765407  | H        | -1.471632 | -0.669192 |
| C        | 2.744135  | 2.131612  | 0.156988  | C        | 1.712630  | -1.062340 |
| H        | 1.761579  | 2.396269  | -0.245130 | H        | 1.221411  | -2.047298 |
| H        | 3.160138  | 2.956621  | 0.743782  | H        | 2.802256  | -1.229980 |
| H        | 3.432403  | 1.879186  | -0.658570 | H        | 1.465943  | -0.675170 |
|          |           |           |           | P        | 0.000838  | 0.947983  |
|          |           |           |           |          |           | -0.356790 |

|             |           |           |           |           |           |           |           |
|-------------|-----------|-----------|-----------|-----------|-----------|-----------|-----------|
| O           | -0.001150 | 1.117518  | 1.163609  | N         | -0.391271 | 1.358472  | -1.356647 |
|             |           |           |           | C         | 1.472761  | 0.731644  | -0.018380 |
| <b>1a</b>   |           |           |           | C         | -0.043539 | 0.002987  | -1.631032 |
| C           | -1.064838 | -0.904542 | 0.000005  | C         | 0.491318  | 1.812953  | -0.327538 |
| C           | 0.251079  | -1.374313 | 0.000069  | O         | -0.628747 | -0.697877 | -2.436675 |
| C           | 1.315819  | -0.469879 | -0.000056 | O         | 0.419323  | 2.912866  | 0.188053  |
| C           | 1.064761  | 0.904631  | 0.000008  | C         | 1.139813  | -0.373089 | -0.803214 |
| C           | -0.250963 | 1.374331  | 0.000062  | C         | 1.855345  | -1.562933 | -0.728427 |
| C           | -1.315859 | 0.469773  | -0.000057 | H         | 1.583979  | -2.413582 | -1.345674 |
| H           | -1.892888 | -1.608249 | -0.000066 | C         | 2.921958  | -1.612680 | 0.174097  |
| H           | 0.446169  | -2.443359 | 0.000079  | H         | 3.504008  | -2.525009 | 0.270476  |
| H           | 2.339236  | -0.835217 | -0.000153 | C         | 3.257551  | -0.498782 | 0.965540  |
| H           | 1.892980  | 1.608127  | 0.000008  | H         | 4.092596  | -0.572868 | 1.656675  |
| H           | -0.446295 | 2.443326  | 0.000018  | C         | 2.535066  | 0.695465  | 0.877404  |
| H           | -2.339195 | 0.835364  | -0.000063 | H         | 2.782203  | 1.562087  | 1.482655  |
| <b>TS10</b> |           |           |           | <b>10</b> |           |           |           |
| C           | -2.976705 | -0.228963 | -0.274735 | C         | 2.434259  | 0.398027  | 1.257899  |
| C           | -1.654843 | 0.645039  | 1.566137  | C         | 2.434181  | 0.398107  | -1.257937 |
| C           | -1.285007 | -0.651633 | 1.917868  | C         | 3.573733  | -0.353387 | -1.226695 |
| C           | -1.758048 | -1.737628 | 1.171650  | C         | 4.169835  | -0.742077 | -0.000113 |
| C           | -2.606971 | -1.525405 | 0.078780  | C         | 3.573839  | -0.353460 | 1.226511  |
| H           | -3.608212 | -0.058722 | -1.140843 | H         | 1.972791  | 0.686673  | 2.198315  |
| H           | -1.271117 | 1.495520  | 2.121566  | H         | 1.972563  | 0.686811  | -2.198258 |
| H           | -0.620023 | -0.819243 | 2.760520  | H         | 4.032947  | -0.665808 | -2.161537 |
| H           | -1.460191 | -2.748321 | 1.437718  | H         | 5.070419  | -1.347638 | -0.000161 |
| H           | -2.961061 | -2.369413 | -0.505658 | H         | 4.033126  | -0.665925 | 2.161303  |
| C           | -2.492699 | 0.860966  | 0.460223  | C         | 1.748863  | 0.862929  | 0.000029  |
| H           | -2.763901 | 1.872692  | 0.177829  | H         | 1.695539  | 1.965174  | 0.000077  |

|   |           |           |           |   |           |           |           |
|---|-----------|-----------|-----------|---|-----------|-----------|-----------|
| N | 0.318173  | 0.481428  | 0.000086  | N | 0.294587  | 0.363937  | -0.000595 |
| C | -1.987251 | 0.618126  | 0.000006  | C | -1.981054 | 0.648159  | -0.000449 |
| C | -0.154782 | -0.845769 | 0.000109  | C | -0.248445 | -0.941064 | 0.000337  |
| C | -0.728230 | 1.418661  | 0.000046  | C | -0.692312 | 1.381110  | -0.001409 |
| O | 0.532409  | -1.844901 | 0.000135  | O | 0.440108  | -1.940060 | 0.000554  |
| O | -0.593744 | 2.627406  | 0.000106  | O | -0.419993 | 2.562644  | -0.002738 |
| C | -1.645084 | -0.734948 | 0.000039  | C | -1.717366 | -0.733742 | 0.000684  |
| C | -2.612852 | -1.728103 | 0.000003  | C | -2.742707 | -1.667359 | 0.001727  |
| H | -2.332235 | -2.776744 | 0.000046  | H | -2.531591 | -2.731694 | 0.002589  |
| C | -3.954217 | -1.320435 | -0.000067 | C | -4.057708 | -1.177779 | 0.001594  |
| H | -4.742169 | -2.068301 | -0.000102 | H | -4.887257 | -1.877958 | 0.002390  |
| C | -4.297441 | 0.038698  | -0.000097 | C | -4.320437 | 0.198131  | 0.000423  |
| H | -5.345884 | 0.323168  | -0.000162 | H | -5.349586 | 0.543424  | 0.000326  |
| C | -3.310292 | 1.034024  | -0.000061 | C | -3.278412 | 1.137961  | -0.000637 |
| H | -3.560991 | 2.090187  | -0.000076 | H | -3.474062 | 2.205254  | -0.001569 |

## 11

|   |          |           |           |
|---|----------|-----------|-----------|
| C | 2.397958 | 0.237340  | 1.254174  |
| C | 2.397487 | 0.230416  | -1.254829 |
| C | 3.679381 | -0.255235 | -1.239070 |
| C | 4.313019 | -0.487853 | 0.001270  |
| C | 3.679767 | -0.248473 | 1.240600  |
| H | 1.862738 | 0.409823  | 2.183710  |
| H | 1.861904 | 0.397582  | -2.185124 |
| H | 4.194570 | -0.497287 | -2.162593 |
| H | 5.322780 | -0.891701 | 0.002212  |
| H | 4.195329 | -0.485433 | 2.165238  |
| C | 1.708122 | 0.620447  | -0.001302 |
| H | 1.758397 | 1.747399  | -0.004216 |

## TS12

|   |          |           |           |
|---|----------|-----------|-----------|
| C | 2.425775 | 0.035341  | 1.242253  |
| C | 2.425212 | 0.034510  | -1.242117 |
| C | 3.803573 | -0.044013 | -1.229767 |
| C | 4.484622 | -0.084230 | -0.000366 |
| C | 3.804125 | -0.043192 | 1.229321  |
| H | 1.864050 | 0.051000  | 2.171224  |
| H | 1.863069 | 0.049533  | -2.170847 |
| H | 4.357588 | -0.102165 | -2.160670 |
| H | 5.568539 | -0.160778 | -0.000585 |
| H | 4.358568 | -0.100717 | 2.160008  |
| C | 1.701799 | 0.177680  | 0.000187  |
| H | 1.483663 | 1.454576  | -0.000267 |

|   |           |           |           |   |           |           |           |
|---|-----------|-----------|-----------|---|-----------|-----------|-----------|
| N | 0.286191  | -0.060028 | 0.000577  | O | 0.080400  | -2.338514 | 0.377508  |
| C | -1.882953 | 0.699743  | 0.000042  | N | -0.321909 | -0.042549 | 0.003793  |
| C | -0.519621 | -1.246940 | 0.000340  | C | -1.755925 | -0.036270 | 0.010608  |
| C | -0.475161 | 1.095332  | 0.000090  | C | -2.447873 | -0.889980 | -0.852371 |
| O | -0.092380 | -2.371018 | 0.000255  | C | -2.427162 | 0.831106  | 0.883812  |
| O | 0.128253  | 2.180989  | -0.000366 | C | -3.841587 | -0.861992 | -0.843589 |
| C | -1.913527 | -0.710159 | 0.000184  | H | -1.905681 | -1.560896 | -1.509428 |
| C | -3.112909 | -1.400825 | 0.000113  | C | -3.822862 | 0.858305  | 0.865767  |
| H | -3.133267 | -2.485717 | 0.000207  | H | -1.871722 | 1.434164  | 1.598156  |
| C | -4.295349 | -0.640970 | -0.000094 | C | -4.527101 | 0.014019  | 0.004216  |
| H | -5.254073 | -1.150197 | -0.000152 | H | -4.392550 | -1.523444 | -1.504403 |
| C | -4.263475 | 0.758912  | -0.000238 | H | -4.354710 | 1.523143  | 1.538775  |
| H | -5.196256 | 1.313668  | -0.000402 | H | -5.612363 | 0.030768  | -0.000050 |
| C | -3.046755 | 1.457092  | -0.000179 | O | 0.042230  | 2.227405  | -0.422344 |
| H | -3.014334 | 2.541550  | -0.000297 | H | -0.940119 | 2.270539  | -0.457736 |

**12**

|   |          |           |           |
|---|----------|-----------|-----------|
| C | 1.864185 | 0.658596  | -0.109402 |
| C | 1.917826 | -0.726391 | 0.129411  |
| C | 3.125495 | -1.390529 | 0.246140  |
| C | 4.296621 | -0.620406 | 0.117671  |
| C | 4.241689 | 0.757787  | -0.121311 |
| C | 3.013634 | 1.427406  | -0.241298 |
| H | 3.163829 | -2.459266 | 0.429181  |
| H | 5.263302 | -1.106187 | 0.205414  |
| H | 5.164973 | 1.320086  | -0.215699 |
| H | 2.966710 | 2.495087  | -0.427515 |
| C | 0.534751 | -1.247172 | 0.208352  |
| C | 0.460084 | 1.019308  | -0.185433 |

**1b**

|   |           |           |           |
|---|-----------|-----------|-----------|
| C | 2.321451  | 0.000093  | 0.240013  |
| C | 0.266341  | 1.203265  | -0.189272 |
| C | -0.436758 | -0.000088 | -0.336608 |
| C | 0.266472  | -1.203355 | -0.189167 |
| C | 1.632943  | -1.206543 | 0.096167  |
| H | 3.385957  | 0.000161  | 0.458826  |
| H | 2.160665  | -2.151043 | 0.202092  |
| H | -0.263632 | -2.146958 | -0.302649 |
| H | -0.263860 | 2.146805  | -0.302859 |
| C | -1.928219 | -0.000159 | -0.595029 |
| H | -2.200480 | 0.879446  | -1.192366 |
| H | -2.200471 | -0.880037 | -1.191966 |



|                |           |           |           |                 |           |           |           |
|----------------|-----------|-----------|-----------|-----------------|-----------|-----------|-----------|
| C              | -2.744381 | 0.000119  | 0.710333  | C               | -4.161653 | 0.627987  | -0.602020 |
| H              | -2.510753 | 0.884607  | 1.313931  | H               | -5.061043 | 1.189184  | -0.840370 |
| H              | -3.821028 | 0.000074  | 0.503800  | C               | -3.200746 | 1.187815  | 0.248687  |
| H              | -2.510744 | -0.884115 | 1.314303  | H               | -3.325384 | 2.173926  | 0.685341  |
| C              | 1.632806  | 1.206642  | 0.096065  | C               | 1.417927  | 1.957268  | -0.933711 |
| H              | 2.160419  | 2.151213  | 0.201878  | H               | 0.869567  | 1.859896  | -1.879150 |
|                |           |           |           | H               | 0.711557  | 2.329463  | -0.184970 |
| <b>TS3ba-o</b> |           |           |           | C               | 2.553689  | 2.985163  | -1.105333 |
| C              | 2.752028  | -0.913605 | 1.244828  | H               | 3.268512  | 2.656764  | -1.868378 |
| C              | 1.948634  | 0.606625  | -0.515485 | H               | 2.152252  | 3.959651  | -1.404928 |
| C              | 2.309715  | -0.353871 | -1.460421 | H               | 3.102951  | 3.117587  | -0.166340 |
| C              | 2.885116  | -1.566983 | -1.068285 | H               | 3.149706  | -2.303208 | -1.822237 |
| C              | 3.119039  | -1.843522 | 0.286423  |                 |           |           |           |
| H              | 2.890192  | -1.119962 | 2.301240  | <b>10-3ba-o</b> |           |           |           |
| H              | 2.145765  | -0.151811 | -2.516274 | C               | 2.080210  | -0.937608 | 1.538884  |
| H              | 3.560583  | -2.790824 | 0.579719  | C               | 2.306183  | 0.415549  | -0.597473 |
| C              | 2.142232  | 0.300737  | 0.857351  | C               | 3.416234  | -0.337480 | -0.877400 |
| H              | 1.913266  | 1.054701  | 1.603639  | C               | 3.885749  | -1.359463 | -0.017431 |
| N              | -0.081900 | -0.439277 | 1.396823  | C               | 3.190317  | -1.646022 | 1.183718  |
| C              | -2.066324 | 0.430803  | 0.511206  | H               | 1.535755  | -1.156063 | 2.453525  |
| C              | -0.568893 | -1.362937 | 0.449080  | H               | 3.952310  | -0.148709 | -1.805614 |
| C              | -0.852107 | 0.733471  | 1.336700  | H               | 3.545318  | -2.446504 | 1.828269  |
| O              | -0.030134 | -2.403903 | 0.121482  | C               | 1.549104  | 0.192545  | 0.698823  |
| O              | -0.569067 | 1.801156  | 1.857613  | H               | 1.579390  | 1.120670  | 1.293974  |
| C              | -1.887613 | -0.837881 | -0.041941 | N               | 0.098288  | 0.027923  | 0.452846  |
| C              | -2.837748 | -1.406405 | -0.879465 | C               | -2.178021 | 0.412073  | 0.409751  |
| H              | -2.686736 | -2.395511 | -1.300846 | C               | -0.467055 | -1.035633 | -0.277683 |
| C              | -3.982811 | -0.649617 | -1.157743 | C               | -0.869043 | 0.947252  | 0.884714  |
| H              | -4.747189 | -1.053225 | -1.816189 | O               | 0.145438  | -1.950257 | -0.786241 |

|                |           |           |           |                 |           |           |           |
|----------------|-----------|-----------|-----------|-----------------|-----------|-----------|-----------|
| O              | -0.646622 | 1.967801  | 1.510167  | N               | -0.076155 | -1.117311 | -1.335821 |
| C              | -1.938159 | -0.773912 | -0.286067 | C               | 1.673665  | -0.959299 | 0.210817  |
| C              | -2.971499 | -1.503228 | -0.854287 | C               | 0.639169  | 0.064720  | -1.613238 |
| H              | -2.770598 | -2.423496 | -1.393829 | C               | 0.402029  | -1.678390 | -0.132317 |
| C              | -4.272364 | -1.002938 | -0.701965 | O               | 0.348995  | 0.907654  | -2.444384 |
| H              | -5.109331 | -1.545677 | -1.132201 | O               | -0.096330 | -2.600294 | 0.485776  |
| C              | -4.512794 | 0.188356  | -0.003397 | C               | 1.824348  | 0.089065  | -0.697351 |
| H              | -5.532085 | 0.550373  | 0.096914  | C               | 2.910150  | 0.953021  | -0.641228 |
| C              | -3.459791 | 0.918030  | 0.565885  | H               | 3.012580  | 1.765013  | -1.354353 |
| H              | -3.630278 | 1.842514  | 1.108624  | C               | 3.848393  | 0.735647  | 0.374504  |
| C              | 1.804741  | 1.492755  | -1.522960 | H               | 4.707631  | 1.394714  | 0.463030  |
| H              | 2.409763  | 1.484334  | -2.437463 | C               | 3.697733  | -0.321131 | 1.288485  |
| H              | 0.775019  | 1.260837  | -1.834150 | H               | 4.442958  | -0.458711 | 2.067152  |
| C              | 1.822600  | 2.906423  | -0.906653 | C               | 2.604863  | -1.193027 | 1.214290  |
| H              | 2.834297  | 3.174829  | -0.581409 | H               | 2.476131  | -2.014405 | 1.912246  |
| H              | 1.494305  | 3.647453  | -1.644172 | H               | -2.572631 | 0.444683  | 2.564501  |
| H              | 1.154667  | 2.978476  | -0.042261 | H               | -1.968033 | 1.444716  | -1.566378 |
| H              | 4.764467  | -1.935048 | -0.290295 | C               | -1.823106 | 2.525677  | 0.933984  |
|                |           |           |           | H               | -2.330257 | 3.253546  | 0.287545  |
|                |           |           |           | H               | -2.144769 | 2.739541  | 1.960662  |
| <b>TS3ba-m</b> |           |           |           | C               | -0.299486 | 2.720705  | 0.814170  |
| C              | -2.842667 | -1.549522 | -0.173556 | H               | 0.033316  | 2.550701  | -0.215495 |
| C              | -2.237911 | 0.733280  | -0.793012 | H               | -0.009648 | 3.736767  | 1.105384  |
| C              | -2.239712 | 1.123240  | 0.546663  | H               | 0.236660  | 2.012996  | 1.456818  |
| C              | -2.566863 | 0.159827  | 1.514635  |                 |           |           |           |
| C              | -2.877635 | -1.160675 | 1.157705  |                 |           |           |           |
| H              | -3.043305 | -2.577314 | -0.455068 | <b>10-3ba-m</b> |           |           |           |
| H              | -3.120905 | -1.883736 | 1.930340  | C               | -1.566913 | -1.673708 | 1.256874  |
| C              | -2.495068 | -0.604690 | -1.159337 | C               | -1.999457 | -0.505305 | -0.927374 |
| H              | -2.515384 | -0.876906 | -2.208060 | C               | -3.175053 | -0.017445 | -0.428640 |

|   |           |           |           |                |           |           |           |
|---|-----------|-----------|-----------|----------------|-----------|-----------|-----------|
| C | -3.573523 | -0.358713 | 0.895627  | H              | -4.098200 | 2.519659  | 0.276130  |
| C | -2.758620 | -1.182982 | 1.708417  |                |           |           |           |
| H | -0.934845 | -2.297302 | 1.882917  | <b>TS3ba-p</b> |           |           |           |
| H | -3.091270 | -1.426063 | 2.714886  | C              | -1.407907 | 1.401262  | -1.225606 |
| C | -1.060604 | -1.364135 | -0.125415 | C              | -2.446223 | 1.601681  | 0.978209  |
| H | -0.864142 | -2.306438 | -0.663093 | C              | -3.175621 | 0.454500  | 0.727508  |
| N | 0.287421  | -0.746383 | -0.069930 | C              | -3.013789 | -0.259385 | -0.475836 |
| C | 2.564823  | -0.428200 | -0.287055 | C              | -2.138405 | 0.249280  | -1.456546 |
| C | 0.556206  | 0.536068  | 0.445579  | H              | -0.716935 | 1.785587  | -1.969428 |
| C | 1.448669  | -1.388522 | -0.530124 | H              | -2.551418 | 2.128280  | 1.921306  |
| O | -0.261718 | 1.306122  | 0.904075  | H              | -3.860932 | 0.072481  | 1.479396  |
| O | 1.493547  | -2.500150 | -1.021435 | H              | -2.030826 | -0.284106 | -2.398081 |
| C | 2.031536  | 0.722571  | 0.295301  | C              | -1.502591 | 2.063073  | 0.026889  |
| C | 2.833083  | 1.801488  | 0.636223  | H              | -1.000268 | 3.013345  | 0.162973  |
| H | 2.404592  | 2.690393  | 1.088592  | N              | 0.384751  | 1.188841  | 0.907885  |
| C | 4.205860  | 1.692500  | 0.373094  | C              | 2.387681  | 0.471337  | -0.053046 |
| H | 4.867550  | 2.516237  | 0.625775  | C              | 0.427187  | -0.208116 | 1.027629  |
| C | 4.741112  | 0.536485  | -0.211785 | C              | 1.444542  | 1.629049  | 0.100576  |
| H | 5.809071  | 0.482210  | -0.403291 | O              | -0.441881 | -0.924074 | 1.495514  |
| C | 3.920724  | -0.548040 | -0.552557 | O              | 1.557043  | 2.739917  | -0.390508 |
| H | 4.320923  | -1.449257 | -1.006446 | C              | 1.762568  | -0.648657 | 0.496883  |
| H | -4.509655 | 0.030087  | 1.286737  | C              | 2.370554  | -1.896089 | 0.493639  |
| H | -1.673922 | -0.246353 | -1.932377 | H              | 1.872233  | -2.758554 | 0.925673  |
| C | -4.025330 | 0.942078  | -1.233582 | C              | 3.639472  | -1.990423 | -0.092913 |
| H | -3.778408 | 0.852945  | -2.298523 | H              | 4.147623  | -2.950453 | -0.123558 |
| H | -5.085963 | 0.674605  | -1.132958 | C              | 4.267808  | -0.864024 | -0.647051 |
| C | -3.817269 | 2.396995  | -0.775996 | H              | 5.251262  | -0.971854 | -1.096418 |
| H | -2.763049 | 2.679965  | -0.867109 | C              | 3.646636  | 0.391642  | -0.632506 |
| H | -4.420727 | 3.089401  | -1.374384 | H              | 4.120221  | 1.270765  | -1.058597 |

|                 |           |           |           |           |           |           |           |
|-----------------|-----------|-----------|-----------|-----------|-----------|-----------|-----------|
| C               | -3.684708 | -1.593830 | -0.675278 | C         | -4.581977 | -1.563352 | 0.000305  |
| H               | -4.027445 | -1.692157 | -1.713721 | H         | -5.303452 | -2.375587 | 0.000319  |
| H               | -4.572967 | -1.664333 | -0.035930 | C         | -5.039741 | -0.238412 | 0.000406  |
| C               | -2.717044 | -2.750072 | -0.342597 | H         | -6.108616 | -0.044358 | 0.000475  |
| H               | -3.225494 | -3.716837 | -0.430416 | C         | -4.140751 | 0.837216  | 0.000397  |
| H               | -1.862489 | -2.746249 | -1.028395 | H         | -4.480215 | 1.868299  | 0.000436  |
| H               | -2.318056 | -2.641917 | 0.670219  | C         | 4.776909  | -1.081051 | 0.000102  |
|                 |           |           |           | H         | 4.847446  | -1.734673 | -0.879156 |
|                 |           |           |           | H         | 4.849074  | -1.731897 | 0.881265  |
| <b>10-3ba-p</b> |           |           |           | C         | 5.968847  | -0.101556 | -0.002588 |
| C               | 1.639195  | 0.685809  | 1.254300  | H         | 6.922618  | -0.642255 | -0.002677 |
| C               | 1.639129  | 0.685498  | -1.254120 | H         | 5.939979  | 0.543419  | -0.888228 |
| C               | 2.818295  | 0.001520  | -1.220076 | H         | 5.941679  | 0.546185  | 0.881081  |
| C               | 3.449514  | -0.369455 | 0.000193  |           |           |           |           |
| C               | 2.818384  | 0.001813  | 1.220369  |           |           |           |           |
| H               | 1.166398  | 0.946257  | 2.197378  | <b>1e</b> |           |           |           |
| H               | 1.166275  | 0.945710  | -2.197235 | C         | 1.851651  | -1.001831 | -0.000088 |
| H               | 3.296328  | -0.279589 | -2.156912 | C         | 1.337587  | 1.351717  | 0.000032  |
| H               | 3.296454  | -0.279055 | 2.157255  | C         | -0.032097 | 1.064860  | 0.000109  |
| C               | 0.916727  | 1.098042  | 0.000059  | C         | -0.455212 | -0.270056 | 0.000135  |
| H               | 0.769953  | 2.191089  | -0.000076 | C         | 0.494262  | -1.303423 | 0.000033  |
| N               | -0.478119 | 0.595431  | 0.000143  | H         | 2.577466  | -1.810896 | -0.000123 |
| C               | -2.787165 | 0.535161  | 0.000276  | H         | 0.139064  | -2.329241 | 0.000037  |
| C               | -0.836390 | -0.766806 | 0.000251  | H         | 1.657955  | 2.390498  | -0.000033 |
| C               | -1.600491 | 1.439860  | 0.000102  | H         | -0.748192 | 1.878655  | 0.000164  |
| O               | -0.068091 | -1.705197 | 0.000041  | O         | -1.761341 | -0.671881 | 0.000117  |
| O               | -1.570347 | 2.655767  | 0.000274  | C         | -2.769646 | 0.324565  | -0.000163 |
| C               | -2.331023 | -0.783696 | 0.000217  | H         | -2.712366 | 0.960264  | -0.894831 |
| C               | -3.210764 | -1.855540 | 0.000206  | H         | -3.721470 | -0.210463 | -0.000339 |
| H               | -2.841767 | -2.876433 | 0.000165  | H         | -2.712752 | 0.960361  | 0.894460  |

|                |           |           |           |                 |           |           |           |
|----------------|-----------|-----------|-----------|-----------------|-----------|-----------|-----------|
| C              | 2.284427  | 0.329683  | -0.000090 | H               | -3.682340 | -1.884249 | 1.551128  |
| H              | 3.345194  | 0.562780  | -0.000076 | O               | -0.852177 | 1.678087  | 1.108337  |
|                |           |           |           | C               | -0.234609 | 1.496128  | 2.379847  |
| <b>TS3ea-o</b> |           |           |           | H               | 0.235649  | 0.507322  | 2.447208  |
| C              | -3.112321 | 0.008593  | -1.204576 | H               | 0.530381  | 2.270346  | 2.447513  |
| C              | -1.767061 | 0.775100  | 0.694673  | H               | -0.956658 | 1.620023  | 3.196707  |
| C              | -2.319870 | -0.230887 | 1.490156  |                 |           |           |           |
| C              | -3.258911 | -1.098952 | 0.931548  | <b>10-3ea-o</b> |           |           |           |
| C              | -3.664430 | -0.978183 | -0.409876 | C               | 2.042876  | -1.494470 | 1.211414  |
| H              | -3.398242 | 0.112986  | -2.245981 | C               | 2.248157  | 0.658209  | -0.068378 |
| H              | -2.030115 | -0.345475 | 2.527710  | C               | 3.376902  | 0.168579  | -0.670407 |
| H              | -4.401400 | -1.664012 | -0.815235 | C               | 3.852118  | -1.130601 | -0.362551 |
| C              | -2.120637 | 0.873084  | -0.685388 | C               | 3.165131  | -1.940388 | 0.573758  |
| H              | -1.784739 | 1.743339  | -1.237246 | H               | 1.511318  | -2.111946 | 1.929477  |
| N              | -0.223096 | -0.036290 | -1.462775 | H               | 3.914597  | 0.767383  | -1.397426 |
| C              | 1.569320  | -0.954326 | -0.265544 | H               | 3.541387  | -2.937396 | 0.789113  |
| C              | 0.747520  | 0.966901  | -1.307351 | C               | 1.468387  | -0.126737 | 0.960337  |
| C              | 0.163275  | -1.182383 | -0.747915 | H               | 1.441805  | 0.454643  | 1.896572  |
| O              | 0.643065  | 2.125436  | -1.673470 | N               | 0.039777  | -0.193400 | 0.588000  |
| O              | -0.513922 | -2.177756 | -0.559875 | C               | -2.240245 | 0.167476  | 0.593382  |
| C              | 1.925317  | 0.349317  | -0.611512 | C               | -0.441201 | -0.705385 | -0.629916 |
| C              | 3.170701  | 0.873280  | -0.291181 | C               | -0.980745 | 0.376060  | 1.366490  |
| H              | 3.433936  | 1.889401  | -0.568843 | O               | 0.232755  | -1.207410 | -1.505326 |
| C              | 4.058045  | 0.041837  | 0.404336  | O               | -0.831130 | 0.913215  | 2.446576  |
| H              | 5.040363  | 0.415370  | 0.680968  | C               | -1.918033 | -0.480205 | -0.599980 |
| C              | 3.699779  | -1.270156 | 0.753355  | C               | -2.889970 | -0.808024 | -1.533125 |
| H              | 4.411197  | -1.888966 | 1.293700  | H               | -2.624761 | -1.311434 | -2.457624 |
| C              | 2.443129  | -1.790153 | 0.416822  | C               | -4.214944 | -0.463481 | -1.231300 |
| H              | 2.152422  | -2.803388 | 0.677505  | H               | -5.005636 | -0.703494 | -1.936642 |

|                |           |           |           |                 |           |           |           |
|----------------|-----------|-----------|-----------|-----------------|-----------|-----------|-----------|
| C              | -4.538267 | 0.187512  | -0.032635 | H               | 4.158176  | 1.550900  | -0.337109 |
| H              | -5.574300 | 0.442161  | 0.172342  | C               | 4.384662  | -0.582100 | -0.722118 |
| C              | -3.546796 | 0.514329  | 0.902990  | H               | 5.396416  | -0.494620 | -1.108693 |
| H              | -3.781719 | 1.019178  | 1.834813  | C               | 3.781168  | -1.848411 | -0.660430 |
| H              | 4.740354  | -1.504729 | -0.860783 | H               | 4.336585  | -2.718150 | -1.000809 |
| O              | 1.677883  | 1.869904  | -0.282618 | C               | 2.477992  | -2.006270 | -0.171106 |
| C              | 2.247029  | 2.712476  | -1.275747 | H               | 1.999624  | -2.979263 | -0.115313 |
| H              | 2.240661  | 2.221907  | -2.257668 | H               | -2.651377 | -0.099777 | -2.628970 |
| H              | 1.622618  | 3.606969  | -1.306191 | H               | -2.977507 | 0.021308  | 1.656115  |
| H              | 3.276766  | 2.992778  | -1.017052 | O               | -3.572645 | -1.331607 | -0.645744 |
|                |           |           |           | C               | -3.814387 | -2.114936 | 0.524271  |
|                |           |           |           | H               | -4.548627 | -1.631088 | 1.182005  |
| <b>TS3ea-m</b> |           |           |           | H               | -4.223722 | -3.061087 | 0.166259  |
| C              | -1.368249 | 2.188257  | -0.455222 | H               | -2.878642 | -2.286895 | 1.066673  |
| C              | -2.639851 | 0.451727  | 0.722964  |                 |           |           |           |
| C              | -2.894130 | -0.170805 | -0.494777 |                 |           |           |           |
| C              | -2.424362 | 0.410133  | -1.698010 | <b>10-3ea-m</b> |           |           |           |
| C              | -1.670528 | 1.579458  | -1.672521 | C               | -1.607718 | -1.610598 | 1.278230  |
| H              | -0.738692 | 3.068535  | -0.404960 | C               | -2.062784 | -0.185541 | -0.755213 |
| H              | -1.306518 | 2.005737  | -2.602628 | C               | -3.191167 | 0.273532  | -0.138005 |
| C              | -1.837796 | 1.603134  | 0.748648  | C               | -3.564746 | -0.185591 | 1.162643  |
| H              | -1.674920 | 2.118508  | 1.687043  | C               | -2.757548 | -1.122052 | 1.837465  |
| N              | 0.322407  | 0.665911  | 1.190594  | H               | -0.977130 | -2.321241 | 1.804283  |
| C              | 1.809685  | -0.860448 | 0.237093  | H               | -3.057431 | -1.456421 | 2.827426  |
| C              | 1.409753  | 1.396753  | 0.684180  | C               | -1.149022 | -1.176420 | -0.086305 |
| C              | 0.430494  | -0.676135 | 0.804617  | H               | -1.041685 | -2.065702 | -0.729572 |
| O              | 1.524532  | 2.610222  | 0.671908  | N               | 0.241137  | -0.661519 | -0.033370 |
| O              | -0.413786 | -1.548423 | 0.941107  | C               | 2.506414  | -0.420847 | -0.413539 |
| C              | 2.409921  | 0.397643  | 0.177333  | C               | 0.640398  | 0.484045  | 0.681594  |
| C              | 3.703552  | 0.565830  | -0.296911 | C               | 1.309828  | -1.258007 | -0.721486 |

|                |           |           |           |                 |           |           |           |
|----------------|-----------|-----------|-----------|-----------------|-----------|-----------|-----------|
| O              | -0.080228 | 1.189452  | 1.355347  | N               | -0.158241 | -2.322385 | 0.510838  |
| O              | 1.235625  | -2.252738 | -1.417685 | C               | 1.592131  | -0.901065 | -0.248084 |
| C              | 2.106391  | 0.621153  | 0.424261  | C               | 0.036275  | -1.276982 | 1.443245  |
| C              | 3.007140  | 1.570574  | 0.882479  | C               | 0.760877  | -2.109497 | -0.553036 |
| H              | 2.681688  | 2.375545  | 1.534020  | O               | -0.596047 | -1.146676 | 2.479408  |
| C              | 4.341311  | 1.444206  | 0.470597  | O               | 0.833479  | -2.804764 | -1.551232 |
| H              | 5.077815  | 2.168071  | 0.807959  | C               | 1.133616  | -0.380546 | 0.960853  |
| C              | 4.742765  | 0.397463  | -0.370911 | C               | 1.668417  | 0.781301  | 1.505128  |
| H              | 5.783968  | 0.326278  | -0.672586 | H               | 1.295259  | 1.176802  | 2.444555  |
| C              | 3.822908  | -0.556687 | -0.827925 | C               | 2.689354  | 1.414424  | 0.787251  |
| H              | 4.119292  | -1.372513 | -1.479810 | H               | 3.133544  | 2.327681  | 1.174087  |
| H              | -4.469019 | 0.214211  | 1.607305  | C               | 3.154199  | 0.888021  | -0.431741 |
| H              | -1.764047 | 0.149262  | -1.741158 | H               | 3.950226  | 1.403387  | -0.962549 |
| O              | -4.065600 | 1.179097  | -0.668006 | C               | 2.608553  | -0.284422 | -0.967772 |
| C              | -3.757473 | 1.730297  | -1.937388 | H               | 2.954989  | -0.700606 | -1.908877 |
| H              | -3.726494 | 0.955660  | -2.716417 | H               | -1.254165 | -1.118129 | -2.475558 |
| H              | -4.558193 | 2.437369  | -2.162646 | H               | -0.501451 | 1.201275  | -2.135086 |
| H              | -2.795286 | 2.260472  | -1.921449 | O               | -1.180470 | 2.688304  | 0.062223  |
|                |           |           |           | C               | -0.233854 | 3.343964  | -0.777012 |
| <b>TS3ea-p</b> |           |           |           | H               | -0.638272 | 3.506392  | -1.784288 |
| C              | -2.863652 | -0.485347 | 0.459476  | H               | -0.039987 | 4.308694  | -0.305538 |
| C              | -1.600682 | -0.564777 | -1.608754 | H               | 0.699026  | 2.770987  | -0.840021 |
| C              | -1.168750 | 0.743730  | -1.415230 |                 |           |           |           |
| C              | -1.574494 | 1.434386  | -0.260501 | <b>10-3ea-p</b> |           |           |           |
| C              | -2.442408 | 0.816434  | 0.666470  | C               | 1.599459  | 1.095292  | 1.300464  |
| H              | -3.492873 | -0.969814 | 1.198513  | C               | 1.711365  | 0.864955  | -1.193541 |
| H              | -2.733467 | 1.376724  | 1.548380  | C               | 2.895042  | 0.189311  | -1.057845 |
| C              | -2.424230 | -1.201756 | -0.665771 | C               | 3.444153  | -0.057849 | 0.222326  |
| H              | -2.732961 | -2.228811 | -0.819812 | C               | 2.777101  | 0.424864  | 1.385659  |

|           |           |           |           |                |           |           |           |
|-----------|-----------|-----------|-----------|----------------|-----------|-----------|-----------|
| H         | 1.098145  | 1.457775  | 2.193390  | C              | -2.137736 | 1.210318  | 0.001930  |
| H         | 3.249938  | 0.240888  | 2.346275  | C              | -0.743251 | 1.212728  | -0.023868 |
| C         | 0.904366  | 1.334272  | -0.013884 | C              | -0.049417 | -0.000096 | -0.036924 |
| H         | 0.660550  | 2.402376  | -0.122946 | C              | -0.743380 | -1.212829 | -0.023867 |
| N         | -0.445734 | 0.706537  | -0.015380 | H              | -2.679028 | -2.152113 | 0.007987  |
| C         | -2.740378 | 0.441092  | -0.075368 | H              | -0.192739 | -2.147607 | -0.042406 |
| C         | -0.685169 | -0.677845 | 0.083537  | H              | -2.678782 | 2.152229  | 0.008017  |
| C         | -1.636286 | 1.444725  | -0.114466 | H              | -0.192500 | 2.147449  | -0.042421 |
| O         | 0.159017  | -1.543849 | 0.178066  | C              | 1.454420  | -0.000043 | -0.002321 |
| O         | -1.712645 | 2.654871  | -0.211713 | F              | 1.973362  | 1.090329  | -0.611467 |
| C         | -2.172120 | -0.827677 | 0.043703  | F              | 1.922242  | 0.001650  | 1.268721  |
| C         | -2.955061 | -1.970520 | 0.105362  | F              | 1.973460  | -1.091911 | -0.608646 |
| H         | -2.499125 | -2.951297 | 0.198403  | C              | -2.835523 | 0.000063  | 0.015903  |
| C         | -4.345542 | -1.802922 | 0.043157  | H              | -3.921910 | 0.000129  | 0.034728  |
| H         | -4.993513 | -2.673776 | 0.088560  |                |           |           |           |
| C         | -4.916067 | -0.528058 | -0.076697 | <b>TS3fa-o</b> |           |           |           |
| H         | -5.997114 | -0.430651 | -0.122277 | C              | 2.596932  | -1.219952 | 1.490842  |
| C         | -4.114262 | 0.620212  | -0.137980 | C              | 2.063883  | 0.428582  | -0.225651 |
| H         | -4.541839 | 1.613706  | -0.230555 | C              | 2.731307  | -0.339657 | -1.168135 |
| H         | 1.293544  | 1.052867  | -2.178333 | C              | 3.336466  | -1.543504 | -0.783629 |
| H         | 3.412329  | -0.148563 | -1.949628 | C              | 3.273230  | -1.977716 | 0.545928  |
| O         | 4.607794  | -0.723356 | 0.459627  | H              | 2.528187  | -1.547844 | 2.522616  |
| C         | 5.312373  | -1.273160 | -0.643440 | H              | 3.750327  | -2.909233 | 0.834919  |
| H         | 5.650548  | -0.490937 | -1.336758 | C              | 1.948048  | -0.018386 | 1.113580  |
| H         | 6.182311  | -1.779905 | -0.221553 | H              | 1.561604  | 0.655399  | 1.870907  |
| H         | 4.697182  | -1.999733 | -1.190681 | N              | -0.149178 | -0.793376 | 1.148405  |
|           |           |           |           | C              | -2.248416 | 0.070678  | 0.655078  |
| <b>1f</b> |           |           |           | C              | -0.582420 | -1.423351 | -0.032894 |
| C         | -2.137882 | -1.210258 | 0.001917  | C              | -1.011971 | 0.268081  | 1.478753  |



|                 |           |           |           |                |           |           |           |
|-----------------|-----------|-----------|-----------|----------------|-----------|-----------|-----------|
| O               | 0.055329  | -2.210076 | -0.705675 | C              | -2.341118 | 0.109948  | 0.609752  |
| O               | -0.787540 | 1.150931  | 2.285732  | C              | -0.630737 | -1.034340 | -0.513281 |
| C               | -1.986665 | -0.947645 | -0.264229 | C              | -1.068037 | 0.291201  | 1.363788  |
| C               | -2.939852 | -1.357915 | -1.185354 | O              | -0.002161 | -1.691042 | -1.315702 |
| H               | -2.723116 | -2.150457 | -1.894792 | O              | -0.862087 | 0.916026  | 2.384591  |
| C               | -4.177141 | -0.701478 | -1.163350 | C              | -2.080208 | -0.681242 | -0.510842 |
| H               | -4.947896 | -0.984184 | -1.875066 | C              | -3.080676 | -1.017277 | -1.410286 |
| C               | -4.439375 | 0.322437  | -0.239441 | H              | -2.863622 | -1.631351 | -2.278627 |
| H               | -5.408012 | 0.814392  | -0.252928 | C              | -4.369261 | -0.529818 | -1.151956 |
| C               | -3.473013 | 0.722532  | 0.692212  | H              | -5.179773 | -0.769165 | -1.834513 |
| H               | -3.661161 | 1.514488  | 1.410252  | C              | -4.630791 | 0.264706  | -0.027046 |
| H               | 2.791471  | 0.000024  | -2.196348 | H              | -5.639686 | 0.628870  | 0.144755  |
| H               | 3.855575  | -2.141711 | -1.526264 | C              | -3.611835 | 0.597428  | 0.876108  |
| C               | 1.368254  | 1.695434  | -0.641894 | H              | -3.798824 | 1.213506  | 1.749978  |
| F               | 1.349265  | 2.608741  | 0.347455  | H              | 3.780836  | 0.223509  | -1.439885 |
| F               | 0.074479  | 1.453576  | -0.983552 | H              | 4.507811  | -2.065595 | -0.792615 |
| F               | 1.953961  | 2.260691  | -1.719845 | C              | 1.685820  | 1.636998  | -0.503886 |
|                 |           |           |           | F              | 1.398698  | 2.399949  | 0.579420  |
|                 |           |           |           | F              | 0.546271  | 1.594659  | -1.248498 |
|                 |           |           |           | F              | 2.606142  | 2.296258  | -1.238196 |
| <b>10-3fa-o</b> |           |           |           |                |           |           |           |
| C               | 1.838300  | -1.797488 | 1.296663  |                |           |           |           |
| C               | 2.142942  | 0.272302  | -0.096111 |                |           |           |           |
| C               | 3.229438  | -0.318650 | -0.678284 | <b>TS3fa-m</b> |           |           |           |
| C               | 3.646555  | -1.618240 | -0.307952 | C              | 0.589085  | 2.118691  | 0.963078  |
| C               | 2.929197  | -2.337968 | 0.680886  | C              | 1.930124  | 1.034773  | -0.776027 |
| H               | 1.277390  | -2.350836 | 2.044216  | C              | 2.574748  | 0.297177  | 0.201360  |
| H               | 3.252094  | -3.341269 | 0.946096  | C              | 2.236720  | 0.455776  | 1.554412  |
| C               | 1.334117  | -0.415711 | 0.980955  | C              | 1.246812  | 1.370560  | 1.930556  |
| H               | 1.360054  | 0.200861  | 1.894776  | H              | -0.189924 | 2.824977  | 1.230213  |
| N               | -0.100646 | -0.436756 | 0.647018  | H              | 0.999696  | 1.495280  | 2.980521  |

|                 |           |           |           |                |           |           |           |
|-----------------|-----------|-----------|-----------|----------------|-----------|-----------|-----------|
| C               | 0.893552  | 1.929128  | -0.408773 | C              | 2.050540  | 1.501181  | 1.945727  |
| H               | 0.483072  | 2.615688  | -1.139312 | H              | 0.182825  | 2.544379  | 1.823791  |
| N               | -0.849319 | 0.675936  | -0.985113 | H              | 2.279865  | 1.876106  | 2.939668  |
| C               | -3.017675 | 0.308346  | -0.234713 | C              | 0.507629  | 1.385144  | -0.036657 |
| C               | -0.895715 | -0.647303 | -0.511844 | H              | 0.358376  | 2.246853  | -0.709274 |
| C               | -2.028750 | 1.357700  | -0.647220 | N              | -0.827825 | 0.753985  | -0.026052 |
| O               | 0.033481  | -1.429149 | -0.446847 | C              | -3.058506 | 0.334311  | -0.444726 |
| O               | -2.194406 | 2.564501  | -0.683437 | C              | -1.144474 | -0.425015 | 0.678476  |
| C               | -2.329679 | -0.904145 | -0.143381 | C              | -1.932336 | 1.270432  | -0.726666 |
| C               | -2.969610 | -2.077646 | 0.229722  | O              | -0.374900 | -1.068322 | 1.359858  |
| H               | -2.422875 | -3.013187 | 0.294854  | O              | -1.923594 | 2.276395  | -1.408960 |
| C               | -4.337198 | -1.996507 | 0.522823  | C              | -2.588242 | -0.678403 | 0.393918  |
| H               | -4.874559 | -2.889922 | 0.828654  | C              | -3.414953 | -1.703643 | 0.827934  |
| C               | -5.028348 | -0.777982 | 0.432193  | H              | -3.035870 | -2.485215 | 1.478842  |
| H               | -6.088444 | -0.750147 | 0.668548  | C              | -4.746997 | -1.684982 | 0.391310  |
| C               | -4.374060 | 0.398956  | 0.046139  | H              | -5.426286 | -2.470969 | 0.708793  |
| H               | -4.896751 | 1.347441  | -0.028747 | C              | -5.218876 | -0.668227 | -0.450392 |
| H               | 2.752523  | -0.134401 | 2.305293  | H              | -6.256349 | -0.681973 | -0.771974 |
| H               | 2.182157  | 0.899931  | -1.820778 | C              | -4.373980 | 0.363284  | -0.883195 |
| C               | 3.608193  | -0.734604 | -0.163876 | H              | -4.725566 | 1.156417  | -1.535533 |
| F               | 4.008891  | -0.622279 | -1.447524 | H              | 3.875331  | 0.319307  | 1.818320  |
| F               | 4.708711  | -0.615861 | 0.619575  | H              | 1.311040  | 0.055530  | -1.623492 |
| F               | 3.137793  | -1.984921 | 0.011519  | C              | 3.681600  | -0.792277 | -0.619521 |
|                 |           |           |           | F              | 3.230618  | -1.352478 | -1.761492 |
| <b>10-3fa-m</b> |           |           |           | F              | 4.819189  | -0.121564 | -0.921279 |
| C               | 0.887996  | 1.878860  | 1.334284  | F              | 4.033896  | -1.794913 | 0.216579  |
| C               | 1.527888  | 0.459552  | -0.640936 |                |           |           |           |
| C               | 2.669498  | 0.120900  | 0.020543  | <b>TS3fa-p</b> |           |           |           |
| C               | 2.964218  | 0.625161  | 1.316865  | C              | -1.586005 | 1.914657  | -1.210830 |

|   |           |           |           |                 |           |           |           |
|---|-----------|-----------|-----------|-----------------|-----------|-----------|-----------|
| C | -0.841622 | 1.591264  | 1.099027  |                 |           |           |           |
| C | -1.765828 | 0.571304  | 1.249235  | <b>10-3fa-p</b> |           |           |           |
| C | -2.597078 | 0.221616  | 0.173148  | C               | -1.038252 | 0.929655  | -1.252658 |
| C | -2.513236 | 0.897777  | -1.050561 | C               | -1.036838 | 0.932273  | 1.261382  |
| H | -1.501070 | 2.436321  | -2.158126 | C               | -2.283924 | 0.382708  | 1.236724  |
| H | -3.170549 | 0.615227  | -1.864559 | C               | -2.932706 | 0.099600  | 0.007225  |
| C | -0.706429 | 2.248913  | -0.151555 | C               | -2.284023 | 0.379873  | -1.224832 |
| H | -0.080459 | 3.131310  | -0.216078 | H               | -0.534123 | 1.128351  | -2.193965 |
| N | 1.144857  | 1.215327  | -0.837315 | H               | -2.792208 | 0.134843  | -2.152294 |
| C | 3.012508  | 0.270784  | 0.176074  | C               | -0.287963 | 1.283493  | 0.003648  |
| C | 1.068154  | -0.173806 | -1.053425 | H               | -0.070423 | 2.365804  | 0.002386  |
| C | 2.169621  | 1.506767  | 0.078855  | N               | 1.060981  | 0.685606  | 0.003319  |
| O | 0.165248  | -0.772659 | -1.604506 | C               | 3.357266  | 0.452981  | -0.001909 |
| O | 2.321608  | 2.561151  | 0.670446  | C               | 1.315193  | -0.700773 | 0.005240  |
| C | 2.340124  | -0.750050 | -0.500367 | C               | 2.244110  | 1.445483  | -0.001212 |
| C | 2.860194  | -2.034161 | -0.582384 | O               | 0.472342  | -1.572489 | 0.008980  |
| H | 2.327016  | -2.817756 | -1.111583 | O               | 2.299107  | 2.659785  | -0.003971 |
| C | 4.087360  | -2.269994 | 0.050647  | C               | 2.802762  | -0.828697 | 0.001815  |
| H | 4.525208  | -3.263853 | 0.019562  | C               | 3.599014  | -1.964007 | 0.001785  |
| C | 4.763001  | -1.244170 | 0.730734  | H               | 3.154681  | -2.954353 | 0.004608  |
| H | 5.711971  | -1.462345 | 1.212660  | C               | 4.988218  | -1.775736 | -0.002141 |
| C | 4.232667  | 0.050270  | 0.800680  | H               | 5.646279  | -2.640013 | -0.002390 |
| H | 4.744481  | 0.852395  | 1.323201  | C               | 5.544607  | -0.489112 | -0.005795 |
| H | -0.186791 | 1.878001  | 1.915256  | H               | 6.624985  | -0.376383 | -0.008765 |
| H | -1.864617 | 0.047444  | 2.194438  | C               | 4.729884  | 0.651689  | -0.005715 |
| C | -3.551456 | -0.930693 | 0.345399  | H               | 5.146951  | 1.653808  | -0.008543 |
| F | -4.160786 | -0.885368 | 1.553464  | H               | -0.531675 | 1.132732  | 2.201735  |
| F | -4.516367 | -0.939504 | -0.597968 | H               | -2.791220 | 0.141165  | 2.165186  |
| F | -2.905723 | -2.114554 | 0.276820  | C               | -4.331507 | -0.432535 | -0.001342 |

|           |           |           |           |    |           |           |           |
|-----------|-----------|-----------|-----------|----|-----------|-----------|-----------|
| F         | -4.624056 | -1.111933 | 1.130496  | C  | -2.196214 | 0.073898  | 0.698434  |
| F         | -5.246957 | 0.565527  | -0.105591 | C  | -0.513643 | 1.518962  | -0.047708 |
| F         | -4.547514 | -1.263031 | -1.047633 | C  | -0.978075 | -0.066795 | 1.559723  |
|           |           |           |           | O  | 0.132334  | 2.268825  | -0.754587 |
| <b>li</b> |           |           |           | O  | -0.781651 | -0.891031 | 2.434758  |
| C         | -2.181877 | 1.208219  | -0.000073 | C  | -1.912773 | 1.028667  | -0.280523 |
| C         | -2.181877 | -1.208219 | -0.000073 | C  | -2.845182 | 1.376712  | -1.248085 |
| C         | -0.785435 | -1.216374 | -0.000052 | H  | -2.611616 | 2.120888  | -2.003142 |
| C         | -0.785435 | 1.216374  | -0.000052 | C  | -4.083149 | 0.723048  | -1.210120 |
| H         | -2.719582 | 2.152384  | -0.000127 | H  | -4.837781 | 0.957591  | -1.955860 |
| H         | -0.233767 | 2.150158  | -0.000111 | C  | -4.367702 | -0.236943 | -0.225248 |
| H         | -2.719582 | -2.152384 | -0.000127 | H  | -5.337018 | -0.727823 | -0.227182 |
| H         | -0.233767 | -2.150158 | -0.000111 | C  | -3.423277 | -0.573410 | 0.752264  |
| C         | -2.882331 | 0.000000  | 0.000179  | H  | -3.628827 | -1.314184 | 1.518608  |
| H         | -3.968525 | 0.000000  | 0.000226  | H  | 3.855805  | 1.872159  | -1.753741 |
| C         | -0.103065 | 0.000000  | 0.000031  | H  | 2.555795  | -0.175609 | -2.276638 |
| Br        | 1.811295  | 0.000000  | 0.000014  | Br | 0.944029  | -2.040687 | -0.631997 |

**TS3ia-o**

|   |           |           |           |
|---|-----------|-----------|-----------|
| C | 2.752469  | 1.157190  | 1.376028  |
| C | 1.954379  | -0.477436 | -0.236274 |
| C | 2.613124  | 0.191650  | -1.258398 |
| C | 3.345498  | 1.343805  | -0.953771 |
| C | 3.421095  | 1.822543  | 0.362406  |
| H | 2.785083  | 1.518138  | 2.398744  |
| H | 3.995974  | 2.716957  | 0.581166  |
| C | 1.976971  | 0.005639  | 1.091773  |
| H | 1.566822  | -0.594270 | 1.895989  |
| N | -0.093120 | 0.957523  | 1.173944  |

**10-3ia-o**

|   |           |           |           |
|---|-----------|-----------|-----------|
| C | -1.746540 | -1.869104 | 1.276381  |
| C | -2.131034 | 0.198056  | -0.078386 |
| C | -3.182467 | -0.418438 | -0.696173 |
| C | -3.534451 | -1.745131 | -0.358347 |
| C | -2.800764 | -2.446259 | 0.633540  |
| H | -1.177760 | -2.404929 | 2.030860  |
| H | -3.085933 | -3.465179 | 0.882044  |
| C | -1.283138 | -0.464910 | 0.978914  |
| H | -1.311876 | 0.140206  | 1.899452  |
| N | 0.144937  | -0.442319 | 0.620909  |

|    |           |           |           |    |           |           |           |
|----|-----------|-----------|-----------|----|-----------|-----------|-----------|
| C  | 2.385086  | 0.109110  | 0.603432  | C  | 2.595504  | 0.056281  | -0.599177 |
| C  | 0.680140  | -1.015342 | -0.549303 | C  | 1.145790  | 1.027465  | 0.964558  |
| C  | 1.109287  | 0.267993  | 1.358585  | C  | 1.611035  | 0.949910  | -1.291913 |
| O  | 0.058314  | -1.655277 | -1.370429 | O  | 0.537704  | 1.238459  | 1.996420  |
| O  | 0.901670  | 0.865739  | 2.395456  | O  | 1.425387  | 1.064803  | -2.491259 |
| C  | 2.129508  | -0.657855 | -0.534916 | C  | 2.307470  | 0.095186  | 0.767009  |
| C  | 3.133644  | -0.972559 | -1.438054 | C  | 3.040228  | -0.642486 | 1.685968  |
| H  | 2.920720  | -1.568708 | -2.319837 | H  | 2.805384  | -0.603126 | 2.745067  |
| C  | 4.420741  | -0.489543 | -1.164147 | C  | 4.079404  | -1.438411 | 1.186646  |
| H  | 5.234377  | -0.713820 | -1.848118 | H  | 4.671705  | -2.039530 | 1.871010  |
| C  | 4.676993  | 0.280656  | -0.021234 | C  | 4.368115  | -1.478202 | -0.186550 |
| H  | 5.684959  | 0.641474  | 0.162738  | H  | 5.179121  | -2.108605 | -0.540548 |
| C  | 3.654145  | 0.592439  | 0.885048  | C  | 3.626480  | -0.723763 | -1.104651 |
| H  | 3.837253  | 1.188690  | 1.773400  | H  | 3.838290  | -0.745866 | -2.169100 |
| H  | -4.364458 | -2.223749 | -0.867296 | H  | -1.146002 | -0.050329 | -1.898956 |
| H  | -3.748231 | 0.116689  | -1.451986 | H  | -3.352349 | 0.211142  | 1.788557  |
| Br | -1.650011 | 1.985348  | -0.519425 | Br | -2.701973 | -1.917269 | -0.164995 |

**TS3ia-m**

|   |           |           |           |
|---|-----------|-----------|-----------|
| C | -1.685622 | 2.668007  | 0.126428  |
| C | -1.516829 | 0.526456  | -1.059975 |
| C | -2.281620 | -0.056708 | -0.064752 |
| C | -2.760003 | 0.693554  | 1.019208  |
| C | -2.463392 | 2.060618  | 1.098947  |
| H | -1.434325 | 3.721001  | 0.193110  |
| H | -2.837374 | 2.635814  | 1.940115  |
| C | -1.166763 | 1.897232  | -0.945854 |
| H | -0.700193 | 2.380083  | -1.796700 |
| N | 0.920185  | 1.638129  | -0.282056 |

**10-3ia-m**

|   |           |          |           |
|---|-----------|----------|-----------|
| C | -0.814360 | 2.035521 | 1.171309  |
| C | -1.481678 | 0.442312 | -0.663174 |
| C | -2.617092 | 0.185562 | 0.042672  |
| C | -2.906812 | 0.804364 | 1.283824  |
| C | -1.977591 | 1.730881 | 1.817831  |
| H | -0.100755 | 2.737364 | 1.592841  |
| H | -2.203352 | 2.202961 | 2.770484  |
| C | -0.446840 | 1.409649 | -0.146760 |
| H | -0.291541 | 2.202256 | -0.898232 |
| N | 0.882052  | 0.767667 | -0.080793 |

|    |           |           |           |    |           |           |           |
|----|-----------|-----------|-----------|----|-----------|-----------|-----------|
| C  | 3.090392  | 0.249695  | -0.508106 | C  | -3.021000 | 0.201645  | 0.188386  |
| C  | 1.201195  | -0.316560 | 0.761634  | C  | -1.129718 | -0.057388 | -1.165647 |
| C  | 1.970404  | 1.162350  | -0.878436 | C  | -2.263427 | 1.492446  | 0.099308  |
| O  | 0.444036  | -0.849914 | 1.544032  | O  | -0.224653 | -0.572648 | -1.794412 |
| O  | 1.956061  | 2.067386  | -1.689998 | O  | -2.447491 | 2.505825  | 0.751274  |
| C  | 2.631373  | -0.633669 | 0.471018  | C  | -2.325495 | -0.743170 | -0.569545 |
| C  | 3.455964  | -1.607848 | 1.013221  | C  | -2.764669 | -2.055659 | -0.677376 |
| H  | 3.085990  | -2.288568 | 1.773485  | H  | -2.214280 | -2.779451 | -1.270386 |
| C  | 4.773649  | -1.672906 | 0.539009  | C  | -3.932710 | -2.399478 | 0.014569  |
| H  | 5.450656  | -2.422679 | 0.938474  | H  | -4.305983 | -3.418694 | -0.034682 |
| C  | 5.234101  | -0.786032 | -0.444078 | C  | -4.631433 | -1.449717 | 0.777765  |
| H  | 6.260538  | -0.862279 | -0.791335 | H  | -5.532853 | -1.751267 | 1.304092  |
| C  | 4.391587  | 0.195113  | -0.985020 | C  | -4.183539 | -0.126410 | 0.873427  |
| H  | 4.734136  | 0.888070  | -1.747075 | H  | -4.713345 | 0.617628  | 1.460118  |
| H  | -1.278854 | -0.046172 | -1.609443 | H  | 1.490996  | 2.641094  | -1.995481 |
| H  | -3.820353 | 0.561261  | 1.812108  | H  | 3.117307  | 0.772637  | -1.790666 |
| Br | -3.892496 | -1.065036 | -0.655934 | Br | 3.705142  | -1.185586 | 0.348425  |

**TS3ia-p**

|   |           |           |           |
|---|-----------|-----------|-----------|
| C | 0.715835  | 1.579384  | 1.164686  |
| C | 1.538288  | 2.055996  | -1.083021 |
| C | 2.445608  | 1.014213  | -0.975203 |
| C | 2.472637  | 0.254555  | 0.201541  |
| C | 1.616902  | 0.530642  | 1.276244  |
| H | 0.034599  | 1.808644  | 1.977779  |
| H | 1.667094  | -0.070616 | 2.176980  |
| C | 0.641806  | 2.335624  | -0.027913 |
| H | -0.001033 | 3.206629  | -0.064915 |
| N | -1.274261 | 1.315341  | -0.885135 |

**10-3ia-p**

|   |           |          |           |
|---|-----------|----------|-----------|
| C | 0.976207  | 1.037931 | 1.256659  |
| C | 0.976200  | 1.038066 | -1.256549 |
| C | 2.218385  | 0.477404 | -1.234451 |
| C | 2.853474  | 0.189806 | 0.000002  |
| C | 2.218392  | 0.477268 | 1.234489  |
| H | 0.481595  | 1.253432 | 2.199428  |
| H | 2.732895  | 0.244173 | 2.161136  |
| C | 0.215776  | 1.370146 | 0.000075  |
| H | -0.043775 | 2.441837 | 0.000132  |
| N | -1.113929 | 0.721634 | 0.000049  |

|           |           |           |           |                |           |           |           |
|-----------|-----------|-----------|-----------|----------------|-----------|-----------|-----------|
| C         | -3.401686 | 0.409804  | -0.000012 | H              | -0.969920 | -0.891646 | 1.722525  |
| C         | -1.320852 | -0.672667 | -0.000017 | H              | -0.969874 | 0.893407  | 1.721632  |
| C         | -2.322468 | 1.439573  | 0.000094  | Br             | -2.146388 | -0.000113 | -0.313877 |
| O         | -0.451104 | -1.517530 | 0.000099  | C              | 3.229352  | -0.000307 | -0.486933 |
| O         | -2.421478 | 2.651354  | -0.000009 | H              | 4.236071  | -0.000533 | -0.895806 |
| C         | -2.803629 | -0.851730 | 0.000010  |                |           |           |           |
| C         | -3.560321 | -2.013780 | 0.000011  | <b>TS3ka-o</b> |           |           |           |
| H         | -3.081837 | -2.988131 | 0.000024  | C              | 1.568569  | 2.767980  | 0.015881  |
| C         | -4.955178 | -1.873698 | -0.000044 | C              | -0.647119 | 1.759100  | -0.160719 |
| H         | -5.583122 | -2.760143 | -0.000061 | C              | -0.398220 | 1.496106  | -1.509079 |
| C         | -5.555483 | -0.606913 | -0.000090 | C              | 0.822522  | 1.859637  | -2.088221 |
| H         | -6.639138 | -0.531321 | -0.000128 | C              | 1.806218  | 2.500343  | -1.331382 |
| C         | -4.780361 | 0.561145  | -0.000077 | H              | 2.336886  | 3.227743  | 0.628630  |
| H         | -5.231667 | 1.548360  | -0.000090 | H              | 2.759450  | 2.762626  | -1.779465 |
| H         | 0.481582  | 1.253658  | -2.199286 | C              | 0.355994  | 2.387593  | 0.602734  |
| H         | 2.732880  | 0.244407  | -2.161118 | H              | 0.191738  | 2.570743  | 1.660258  |
| Br        | 4.582229  | -0.592069 | -0.000049 | N              | 1.907937  | 0.279134  | 1.730387  |
|           |           |           |           | C              | 0.628305  | -1.471625 | 0.759911  |
| <b>1k</b> |           |           |           | C              | 2.584022  | -0.216647 | 0.573218  |
| C         | 2.580600  | -1.209208 | -0.222456 | C              | 0.669349  | -0.427391 | 1.821517  |
| C         | 2.580938  | 1.208879  | -0.222960 | O              | 3.647712  | 0.219503  | 0.173934  |
| C         | 1.289211  | 1.208216  | 0.302050  | O              | -0.188094 | -0.176934 | 2.651096  |
| C         | 0.631905  | 0.000274  | 0.572219  | C              | 1.786867  | -1.334119 | -0.008434 |
| C         | 1.288877  | -1.207968 | 0.302549  | C              | 2.035382  | -2.151976 | -1.105066 |
| H         | 3.080937  | -2.152203 | -0.425052 | H              | 2.939206  | -2.032533 | -1.694030 |
| H         | 0.780865  | -2.148637 | 0.501169  | C              | 1.072608  | -3.117934 | -1.412219 |
| H         | 3.081534  | 2.151651  | -0.425955 | H              | 1.221371  | -3.773517 | -2.265732 |
| H         | 0.781473  | 2.149114  | 0.500284  | C              | -0.094131 | -3.255964 | -0.637506 |
| C         | -0.750466 | 0.000582  | 1.136681  | H              | -0.823767 | -4.013164 | -0.910090 |

|                 |           |           |           |                |           |           |           |
|-----------------|-----------|-----------|-----------|----------------|-----------|-----------|-----------|
| C               | -0.332900 | -2.432041 | 0.465964  | H              | -4.946855 | -0.786114 | -1.863620 |
| H               | -1.236007 | -2.514098 | 1.060010  | C              | -4.417916 | -0.314355 | 0.169656  |
| H               | 1.003228  | 1.635266  | -3.135901 | H              | -5.441104 | -0.076073 | 0.446017  |
| H               | -1.151425 | 0.988585  | -2.102686 | C              | -3.400022 | -0.208672 | 1.127411  |
| C               | -1.957622 | 1.461304  | 0.523177  | H              | -3.601632 | 0.109101  | 2.145477  |
| H               | -1.808986 | 1.229005  | 1.577731  | H              | 4.877059  | -0.967300 | -1.334943 |
| H               | -2.662219 | 2.289804  | 0.424769  | H              | 3.841836  | 1.206373  | -0.748728 |
| Br              | -2.948601 | -0.103176 | -0.206717 | C              | 1.676544  | 1.666151  | 0.784438  |
|                 |           |           |           | H              | 1.165950  | 1.642900  | 1.746848  |
|                 |           |           |           | H              | 2.388554  | 2.488300  | 0.737306  |
|                 |           |           |           | Br             | 0.192097  | 2.273805  | -0.494916 |
| <b>10-3ka-o</b> |           |           |           |                |           |           |           |
| C               | 2.276736  | -2.163461 | 0.497795  |                |           |           |           |
| C               | 2.261677  | 0.366748  | 0.399365  |                |           |           |           |
| C               | 3.391639  | 0.285562  | -0.383264 | <b>TS3ka-m</b> |           |           |           |
| C               | 3.984028  | -0.947120 | -0.718802 | C              | 0.211693  | 2.531771  | 0.453664  |
| C               | 3.407126  | -2.162646 | -0.261835 | C              | 1.404042  | 0.766845  | -0.756745 |
| H               | 1.815186  | -3.090306 | 0.825871  | C              | 1.892001  | 0.260397  | 0.446374  |
| H               | 3.869889  | -3.106462 | -0.537685 | C              | 1.563080  | 0.915448  | 1.641189  |
| C               | 1.593737  | -0.892336 | 0.920400  | C              | 0.730995  | 2.048315  | 1.642626  |
| H               | 1.581314  | -0.841694 | 2.022994  | H              | -0.463421 | 3.379360  | 0.434612  |
| N               | 0.156168  | -0.928248 | 0.589734  | H              | 0.492982  | 2.537412  | 2.582736  |
| C               | -2.111306 | -0.521537 | 0.722699  | C              | 0.518398  | 1.868653  | -0.763437 |
| C               | -0.363229 | -1.163983 | -0.701611 | H              | 0.224293  | 2.319824  | -1.703119 |
| C               | -0.831891 | -0.483843 | 1.482855  | N              | -1.321734 | 0.578778  | -1.066533 |
| O               | 0.281008  | -1.497266 | -1.672255 | C              | -3.439049 | 0.195636  | -0.197247 |
| O               | -0.629954 | -0.134928 | 2.631861  | C              | -1.339247 | -0.750392 | -0.632839 |
| C               | -1.831036 | -0.923881 | -0.584075 | C              | -2.482388 | 1.254049  | -0.666944 |
| C               | -2.829136 | -1.030111 | -1.540096 | O              | -0.418764 | -1.550522 | -0.652844 |
| H               | -2.595811 | -1.337597 | -2.554563 | O              | -2.673919 | 2.456077  | -0.706710 |
| C               | -4.136853 | -0.718019 | -1.142920 | C              | -2.746131 | -1.016605 | -0.173278 |



|                 |           |           |           |                |           |           |           |
|-----------------|-----------|-----------|-----------|----------------|-----------|-----------|-----------|
| C               | -3.358177 | -2.197833 | 0.219887  | O              | -1.055015 | -1.508208 | 1.035263  |
| H               | -2.808298 | -3.133727 | 0.230462  | O              | -2.280218 | 2.511614  | -0.862023 |
| C               | -4.703510 | -2.124307 | 0.605829  | C              | -3.189002 | -0.749879 | 0.113923  |
| H               | -5.218403 | -3.024088 | 0.931095  | C              | -4.089231 | -1.796435 | 0.244953  |
| C               | -5.399612 | -0.906116 | 0.582884  | H              | -3.786053 | -2.737076 | 0.693944  |
| H               | -6.441473 | -0.884109 | 0.890342  | C              | -5.393695 | -1.586134 | -0.223650 |
| C               | -4.773265 | 0.278913  | 0.173489  | H              | -6.128612 | -2.381654 | -0.139101 |
| H               | -5.300413 | 1.227539  | 0.148540  | C              | -5.767438 | -0.364609 | -0.800865 |
| H               | 1.651201  | 0.273865  | -1.690482 | H              | -6.785984 | -0.232381 | -1.154534 |
| H               | 1.949687  | 0.531911  | 2.582165  | C              | -4.848635 | 0.686517  | -0.928338 |
| C               | 2.694371  | -1.000163 | 0.454254  | H              | -5.123767 | 1.637534  | -1.373455 |
| H               | 2.785648  | -1.432737 | 1.450059  | H              | 0.876421  | 0.187631  | -1.450700 |
| H               | 2.283141  | -1.735541 | -0.236153 | H              | 3.207072  | -0.475209 | 2.104873  |
| Br              | 4.577127  | -0.688664 | -0.155895 | C              | 3.073652  | -1.088059 | -0.537825 |
|                 |           |           |           | H              | 3.292864  | -2.027317 | -0.029099 |
| <b>10-3ka-m</b> |           |           |           | H              | 2.731033  | -1.287091 | -1.552620 |
| C               | 0.326779  | 1.313794  | 1.813438  | Br             | 4.864802  | -0.210526 | -0.745564 |
| C               | 1.046287  | 0.334039  | -0.387013 |                |           |           |           |
| C               | 2.122575  | -0.229961 | 0.235929  | <b>TS3ka-p</b> |           |           |           |
| C               | 2.335252  | -0.033797 | 1.632743  | C              | -0.564646 | 2.268802  | -1.175432 |
| C               | 1.424797  | 0.737029  | 2.388914  | C              | -1.250760 | 2.520771  | 1.160991  |
| H               | -0.377574 | 1.899270  | 2.397378  | C              | -2.257801 | 1.593090  | 0.956783  |
| H               | 1.603457  | 0.870140  | 3.452929  | C              | -2.423803 | 0.983248  | -0.298735 |
| C               | 0.027234  | 1.162663  | 0.346272  | C              | -1.571796 | 1.341269  | -1.363961 |
| H               | -0.034706 | 2.160385  | -0.120067 | H              | 0.110458  | 2.535558  | -1.980830 |
| N               | -1.336024 | 0.627146  | 0.133561  | H              | -1.707470 | 0.870526  | -2.334155 |
| C               | -3.561505 | 0.466553  | -0.461078 | C              | -0.352309 | 2.834331  | 0.110737  |
| C               | -1.750692 | -0.665606 | 0.508235  | H              | 0.351348  | 3.650463  | 0.218666  |
| C               | -2.374410 | 1.370039  | -0.454917 | N              | 1.384069  | 1.569845  | 0.763518  |

|                 |           |           |           |           |           |           |           |
|-----------------|-----------|-----------|-----------|-----------|-----------|-----------|-----------|
| C               | 2.833091  | 0.060228  | -0.258456 | C         | -0.103250 | 1.021752  | -0.000255 |
| C               | 1.086513  | 0.297407  | 1.284272  | H         | -0.209906 | 2.119803  | 0.000121  |
| C               | 2.294810  | 1.459538  | -0.298429 | N         | -1.507281 | 0.563361  | -0.000174 |
| O               | 0.217327  | 0.025817  | 2.091010  | C         | -3.815888 | 0.570990  | 0.000158  |
| O               | 2.580056  | 2.337869  | -1.094474 | C         | -1.904511 | -0.788283 | -0.000220 |
| C               | 2.090233  | -0.647709 | 0.688278  | C         | -2.605227 | 1.441818  | 0.000014  |
| C               | 2.331653  | -1.988896 | 0.949888  | O         | -1.159004 | -1.745103 | -0.000431 |
| H               | 1.743739  | -2.525600 | 1.687814  | O         | -2.535286 | 2.655371  | 0.000037  |
| C               | 3.348468  | -2.611738 | 0.214733  | C         | -3.397984 | -0.761154 | 0.000052  |
| H               | 3.562114  | -3.664408 | 0.378531  | C         | -4.308583 | -1.806975 | 0.000241  |
| C               | 4.096137  | -1.900272 | -0.737136 | H         | -3.969949 | -2.838290 | 0.000165  |
| H               | 4.876488  | -2.414467 | -1.291471 | C         | -5.670705 | -1.474912 | 0.000543  |
| C               | 3.849293  | -0.544040 | -0.985854 | H         | -6.415369 | -2.265808 | 0.000712  |
| H               | 4.419539  | 0.017758  | -1.719159 | C         | -6.089749 | -0.137278 | 0.000642  |
| H               | -1.108379 | 2.970547  | 2.137487  | H         | -7.152441 | 0.087818  | 0.000877  |
| H               | -2.909817 | 1.310130  | 1.777992  | C         | -5.160153 | 0.912011  | 0.000447  |
| C               | -3.468359 | -0.061846 | -0.497636 | H         | -5.469935 | 1.952342  | 0.000523  |
| H               | -4.269866 | -0.009332 | 0.238399  | H         | 0.135779  | 0.864241  | -2.197731 |
| H               | -3.881457 | -0.065951 | -1.506242 | H         | 2.258875  | -0.377392 | -2.162161 |
| Br              | -2.671388 | -1.891392 | -0.269263 | C         | 3.669217  | -1.216795 | -0.001404 |
|                 |           |           |           | H         | 3.833254  | -1.813957 | 0.894318  |
|                 |           |           |           | H         | 3.833987  | -1.811880 | -0.898374 |
| <b>10-3ka-p</b> |           |           |           | Br        | 5.263368  | 0.078537  | 0.000844  |
| C               | 0.607301  | 0.594005  | 1.255714  |           |           |           |           |
| C               | 0.606973  | 0.594842  | -1.256663 |           |           |           |           |
| C               | 1.776254  | -0.098362 | -1.228249 | <b>1m</b> |           |           |           |
| C               | 2.394383  | -0.481688 | -0.001075 | C         | 2.391999  | 0.697828  | 0.000112  |
| C               | 1.776493  | -0.099181 | 1.226588  | C         | 1.185088  | -1.394766 | -0.000041 |
| H               | 0.136294  | 0.862831  | 2.197048  | C         | -0.028553 | -0.701277 | -0.000096 |
| H               | 2.259404  | -0.378906 | 2.160144  | C         | -0.028720 | 0.701443  | -0.000106 |

|    |           |           |           |    |           |           |           |
|----|-----------|-----------|-----------|----|-----------|-----------|-----------|
| C  | 1.185166  | 1.394538  | 0.000092  | H  | 4.665511  | -2.546860 | 0.739922  |
| H  | 3.327806  | 1.248478  | 0.000318  | C  | 4.494357  | -0.733647 | -0.411104 |
| H  | 1.168482  | 2.479140  | 0.000344  | H  | 5.458869  | -0.876492 | -0.890423 |
| H  | 1.167997  | -2.479307 | 0.000056  | C  | 3.721729  | 0.389326  | -0.732152 |
| C  | 2.391832  | -0.698020 | -0.000185 | H  | 4.057806  | 1.131569  | -1.449336 |
| H  | 3.327848  | -1.248528 | 0.000013  | Cl | -2.808305 | -2.200795 | -0.743179 |
| Cl | -1.516955 | -1.619716 | 0.000080  | H  | -3.834668 | -1.020225 | 1.595228  |
| Cl | -1.516752 | 1.619818  | -0.000044 | Cl | -0.942196 | -0.003445 | -2.214207 |

### TS3ma-o

### 10-3ma-o

|   |           |           |           |   |           |           |           |
|---|-----------|-----------|-----------|---|-----------|-----------|-----------|
| C | -2.245784 | 1.934855  | 1.071462  | C | 1.373051  | 0.743922  | 2.137187  |
| C | -1.761067 | 0.340301  | -0.719205 | C | 1.847545  | -0.566983 | 0.040257  |
| C | -2.568275 | -0.603743 | -0.083495 | C | 2.956158  | 0.216473  | -0.157775 |
| C | -3.215655 | -0.270889 | 1.114241  | C | 3.293780  | 1.251169  | 0.748030  |
| C | -3.061185 | 0.997865  | 1.682438  | C | 2.489852  | 1.484203  | 1.889388  |
| H | -2.095546 | 2.917521  | 1.504919  | H | 0.749156  | 0.925262  | 3.006992  |
| H | -3.576165 | 1.233911  | 2.608014  | H | 2.778208  | 2.274365  | 2.577073  |
| C | -1.550865 | 1.605952  | -0.117439 | C | 0.912405  | -0.348301 | 1.210718  |
| H | -1.034975 | 2.373290  | -0.684390 | H | 0.819302  | -1.294753 | 1.766917  |
| N | 0.481248  | 1.294556  | 0.774151  | N | -0.462716 | -0.102117 | 0.747310  |
| C | 2.491369  | 0.514195  | -0.101166 | C | -2.701820 | -0.407412 | 0.284560  |
| C | 0.690413  | 0.006865  | 1.305059  | C | -0.839783 | 0.969608  | -0.086606 |
| C | 1.428055  | 1.562115  | -0.232229 | C | -1.529614 | -0.984094 | 1.002700  |
| O | -0.075108 | -0.606097 | 2.024241  | O | -0.104255 | 1.852008  | -0.474671 |
| O | 1.380520  | 2.477397  | -1.034020 | O | -1.461343 | -1.990262 | 1.679469  |
| C | 2.041807  | -0.431647 | 0.823422  | C | -2.290634 | 0.758596  | -0.364908 |
| C | 2.803477  | -1.543409 | 1.155293  | C | -3.170602 | 1.515322  | -1.123927 |
| H | 2.441366  | -2.271309 | 1.874582  | H | -2.837000 | 2.418494  | -1.625094 |
| C | 4.042339  | -1.685075 | 0.517581  | C | -4.494462 | 1.063639  | -1.215403 |

|    |           |           |           |    |           |           |           |
|----|-----------|-----------|-----------|----|-----------|-----------|-----------|
| H  | -5.214000 | 1.627817  | -1.801886 | H  | -4.577190 | -2.948022 | -0.601150 |
| C  | -4.906909 | -0.106805 | -0.563455 | C  | -4.624064 | -1.111113 | 0.523498  |
| H  | -5.939420 | -0.431559 | -0.655049 | H  | -5.562568 | -1.362966 | 1.009474  |
| C  | -4.008855 | -0.863864 | 0.201516  | C  | -3.992068 | 0.101979  | 0.824985  |
| H  | -4.313641 | -1.773291 | 0.709651  | H  | -4.413652 | 0.807703  | 1.533919  |
| Cl | 4.016031  | -0.027551 | -1.531008 | H  | 0.623417  | 1.173113  | 1.997053  |
| H  | 4.171262  | 1.854946  | 0.550921  | Cl | 3.896073  | -1.389772 | -0.588674 |
| Cl | 1.393926  | -1.862641 | -1.022684 | Cl | 2.171388  | -1.197027 | 2.135190  |

### TS3ma-m

### 10-3ma-m

|   |           |           |           |   |           |           |           |
|---|-----------|-----------|-----------|---|-----------|-----------|-----------|
| C | 1.849763  | 2.006014  | -1.090215 | C | 1.101614  | 1.079632  | -1.584938 |
| C | 1.206480  | 1.099787  | 1.086047  | C | 1.351885  | 0.837626  | 0.901113  |
| C | 2.057575  | 0.022553  | 0.891092  | C | 2.544875  | 0.209128  | 0.698411  |
| C | 2.816684  | -0.061936 | -0.295650 | C | 3.049202  | -0.002710 | -0.618868 |
| C | 2.711394  | 0.942472  | -1.272364 | C | 2.299940  | 0.454796  | -1.736991 |
| H | 1.753957  | 2.769079  | -1.854782 | H | 0.535717  | 1.415115  | -2.448680 |
| H | 3.307274  | 0.855107  | -2.173792 | H | 2.711992  | 0.289994  | -2.727462 |
| C | 1.047444  | 2.077881  | 0.075782  | C | 0.486255  | 1.313595  | -0.233970 |
| H | 0.485103  | 2.974422  | 0.307953  | H | 0.274814  | 2.387564  | -0.103657 |
| N | -0.897847 | 1.376909  | -0.720557 | N | -0.858813 | 0.707915  | -0.151620 |
| C | -2.790498 | 0.368246  | 0.182817  | C | -3.141158 | 0.460047  | 0.084741  |
| C | -0.944796 | 0.064282  | -1.225871 | C | -1.116990 | -0.674267 | -0.259541 |
| C | -1.857010 | 1.535938  | 0.293259  | C | -2.031379 | 1.455706  | 0.058877  |
| O | -0.112210 | -0.465070 | -1.937181 | O | -0.282910 | -1.535417 | -0.440062 |
| O | -1.896246 | 2.447503  | 1.101822  | O | -2.080251 | 2.663407  | 0.187331  |
| C | -2.232154 | -0.529512 | -0.730402 | C | -2.595528 | -0.811441 | -0.104649 |
| C | -2.852887 | -1.731386 | -1.040772 | C | -3.391270 | -1.946923 | -0.126716 |
| H | -2.406936 | -2.421137 | -1.750525 | H | -2.953530 | -2.929193 | -0.274182 |
| C | -4.063145 | -2.013463 | -0.394228 | C | -4.770771 | -1.769636 | 0.049050  |

|    |           |           |           |
|----|-----------|-----------|-----------|
| H  | -5.428015 | -2.634443 | 0.038549  |
| C  | -5.318277 | -0.493235 | 0.238809  |
| H  | -6.391206 | -0.388678 | 0.372306  |
| C  | -4.504226 | 0.647807  | 0.259448  |
| H  | -4.914808 | 1.641861  | 0.406076  |
| H  | 0.979349  | 0.990036  | 1.908054  |
| Cl | 4.560202  | -0.804459 | -0.907748 |
| Cl | 3.458483  | -0.331560 | 2.093838  |

## 6. Reference

- [1] S. Zhao, Y. Zhu, Y. C. Wu, T. Lu and Q. F. Zhou, Phosphine-Catalyzed Domino Reactions of Allenates with *N*-Hydroxyphthalimides: Direct Method to 3a-Hydroxyisoxazolo[3,2-*a*]isoindol-8(3 *aH*)-one Derivatives. *ChemistrySelect*, 2017, **2**, 1700.
- [2] T. Kuribara, M. Nakajima and T. Nemoto, Visible-Light-Induced Metal-/Photocatalyst-Free C–H Bond Imidation of Arenes. *Org. Lett.*, 2020, **22**, 2235.
- [3] R. Shrestha, P. Mukherjee, Y. Tan, Z. C. Litman and J. F. Hartwig, Sterically Controlled, Palladium-Catalyzed Intermolecular Amination of Arenes. *J. Am. Chem. Soc.*, 2013, **135**, 8480.
- [4] Y. S. Shi, F. Liao, H. Niu and A. W. Lei, Selective Formation of Phthalimides from Amines, Aldehydes and CO by Pd-Catalyzed Oxidative C–H Aminocarbonylation. *Org. Chem. Front.*, 2018, **5**, 1957.
- [5] L. Marchetti, A. Kantak,; R. Davis and B. DeBoef, Regioselective Gold-Catalyzed Oxidative C–N Bond Formation. *Org. Lett.*, 2015, **17**, 358.
- [6] a) R. K. P. Subramanya, K. U. Sunil and S. J. Branko, Microwave-Assisted Benzyl Mono- and Dibromination in Diethyl Carbonate as Environmentally Friendly Alternative to Radical Bromination in Carbon Tetrachloride. *Green Chem.*, 2011, **13**, 928. b) X. F. Zhang, D. G. Huang, Y. S. Chen and R. H. Holm, Synthesis of Binucleating Macrocycles and Their Nickel(II) Hydroxo- and Cyano-Bridged Complexes with Divalent Ions: Anatomical Variation of Ligand Features. *Inorg. Chem.*, 2012, **51**, 20, 11017. c) K. U. Sunil and S. J. Branko, Microwave-Assisted NBS Bromination of *p*-Iminotoluenes: Preparation of New Alcohol, Mercapto, and Amino Protection Groups. *Synth. Commun.*, 2011, **41**, 3177.
- [7] L. J. Allen, P. J. Cabrera, M. Lee and M. S. Sanford, 3-Substituted Phthalic Acid Derivatives by Sonogashira Coupling Reaction. *J. Am. Chem. Soc.*, 2014, **136**, 5607.
- [8] G. Jean, L. Stéphane, P. Alain, R. Pierre, P. Bruno, B. A. Paola and M. Claude,

Synthesis and Biological Activity of 6*H*-Isoindolo[2,1-*a*] Indol-6-ones, Analogues of Batracylin, and Related Compounds. *Eur. Med. Chem.*, 2006, **41**, 379.

[9] Y. C. Yuan, K. Raghu, B. O. Christian, L. Thierry, R. Thierry and G. D. Rafael, Orcid Unmasking Amides: Ruthenium-Catalyzed Protodecarbonylation of *N*-Substituted Phthalimide Derivatives. *Org. Lett.*, 2017, **19**, 6404.

[10] D. S. Suman and A. Lutz, Ruthenium(II)-Catalyzed C–H Activation with Isocyanates: A Versatile Route to Phthalimides. *Chem. Eur. J.*, 2014, **20**, 13932.

[11] W. Oliver and R. W. Siegfried, 3-Substituted Phthalic Acid Derivatives by Sonogashira Coupling Reaction. *Synthesis*, 2007, **5**, 761.

[12] Gaussian 09, Revision E.01, M. J. Frisch, G. W. Trucks, H. B. Schlegel, G. E. Scuseria, M. A. Robb, J. R. Cheeseman, G. Scalmani, V. Barone, B. Mennucci, G. A. Petersson, H. Nakatsuji, M. Caricato, X. Li, H. P. Hratchian, A. F. Izmaylov, J. Bloino, G. Zheng, J. L. Sonnenberg, M. Hada, M. Ehara, K. Toyota, R. Fukuda, J. Hasegawa, M. Ishida, T. Nakajima, Y. Honda, O. Kitao, H. Nakai, T. Vreven, J. A. Montgomery, Jr., J. E. Peralta, F. Ogliaro, M. Bearpark, J. J. Heyd, E. Brothers, K. N. Kudin, V. N. Staroverov, T. Keith, R. Kobayashi, J. Normand, K. Raghavachari, A. Rendell, J. C. Burant, S. S. Iyengar, J. Tomasi, M. Cossi, N. Rega, J. M. Millam, M. Klene, J. E. Knox, J. B. Cross, V. Bakken, C. Adamo, J. Jaramillo, R. Gomperts, R. E. Stratmann, O. Yazyev, A. J. Austin, R. Cammi, C. Pomelli, J. W. Ochterski, R. L. Martin, K. Morokuma, V. G. Zakrzewski, G. A. Voth, P. Salvador, J. J. Dannenberg, S. Dapprich, A. D. Daniels, O. Farkas, J. B. Foresman, J. V. Ortiz, J. Cioslowski and D. J. Fox, Gaussian, Inc., Wallingford CT, 2013.

[13] A. D. Becke, *J. Chem. Phys.* 1993, **98**, 5648. b) C. Lee, W. Yang and R. G. Parr, *Phys. Rev., B* 1988, **37**, 785.

[14] a) R. Ditchfield, W. J. Hehre and J. A. Pople, *J. Chem. Phys.*, 1971, **54**, 724. b) W. J. Hehre, R. Ditchfield and J. A. Pople, *J. Chem. Phys.*, 1972, **56**, 2257. c) P. C. Hariharan and J. A. Pople, *Theor. Chem. Acc.*, 1973, **28**, 213.

[15] a) T. Clark, J. Chandrasekhar, G. W. Spitznagel and P. Von R. Schleyer, *J. Comput. Chem.*, 1983, **4**, 294. b) R. Krishnan, J. S. Binkley, R. Seeger and J. A. Pople, *J. Chem.*

*Phys.*, 1980, **72**, 650.

[16] A. V. Marenich, C. J. Cramer and D. G. Truhlar, *J. Phys. Chem. B.*, 2009, **113**, 6378.



## 7. Copies of $^1\text{H}$ NMR, $^{13}\text{C}$ NMR and $^{19}\text{F}$ NMR Spectra.

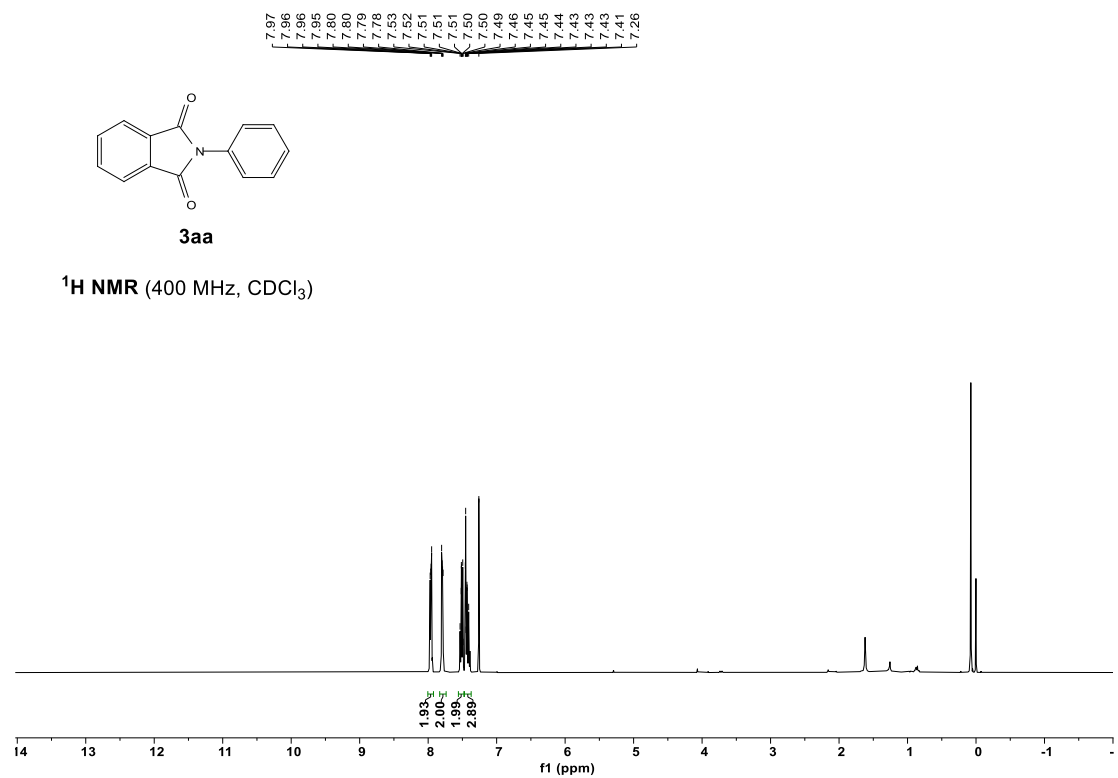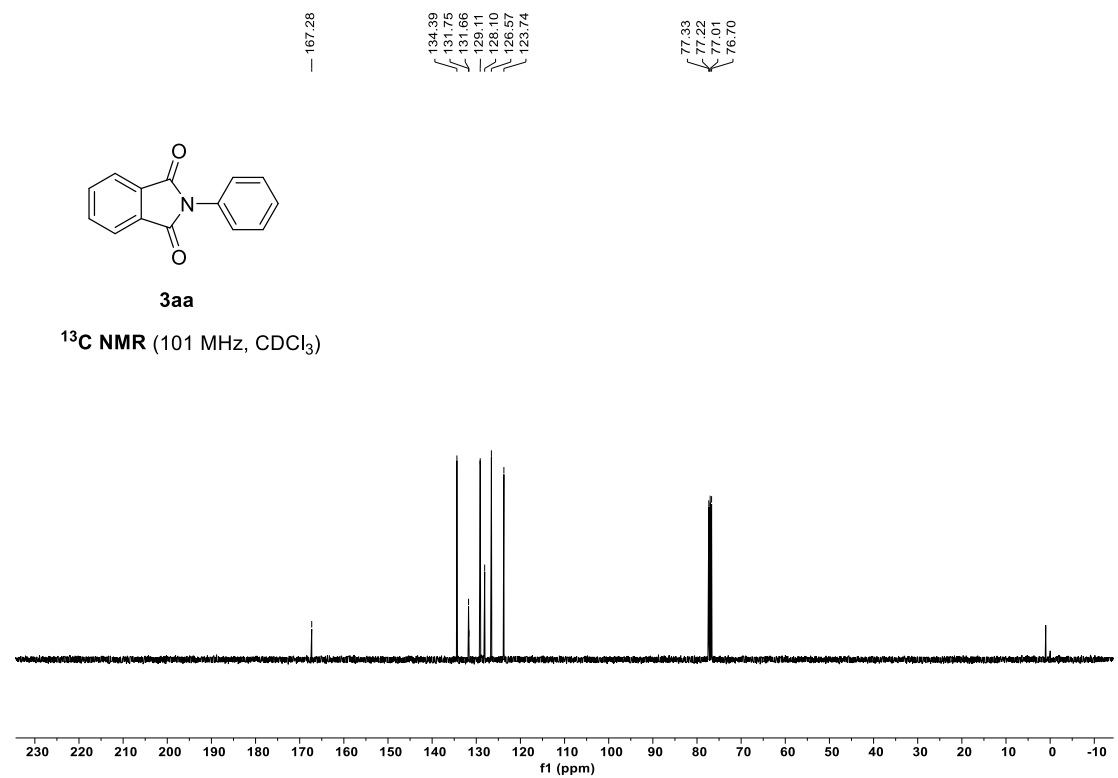

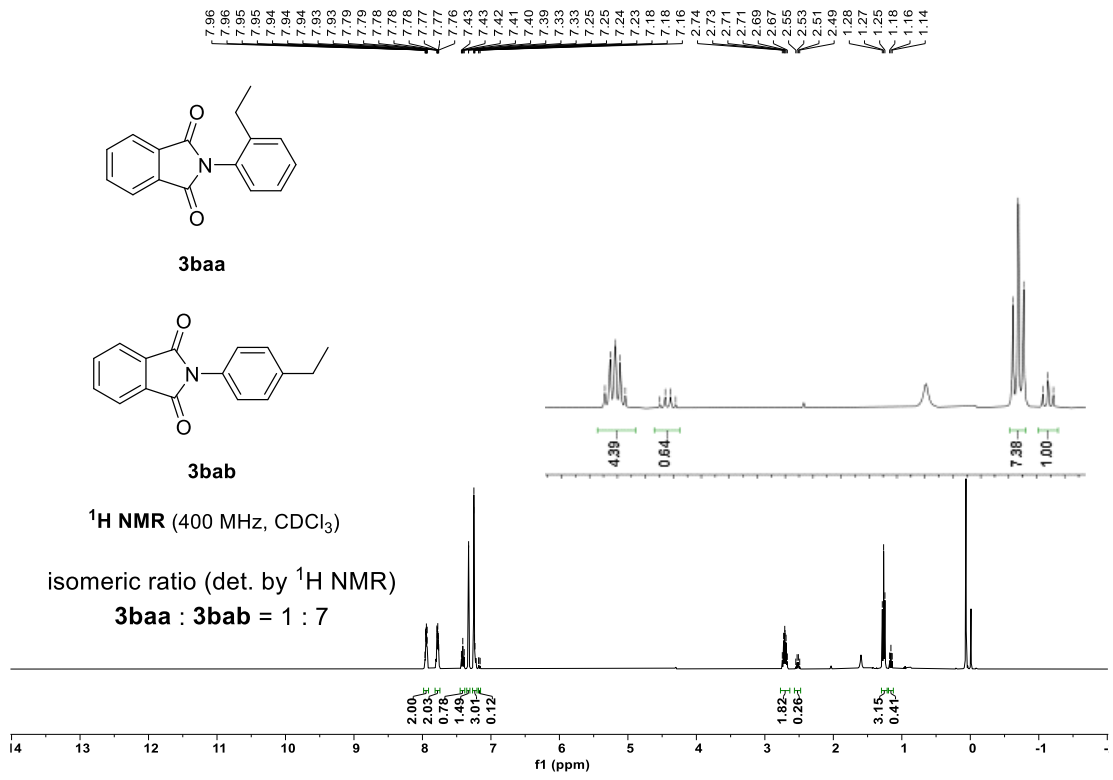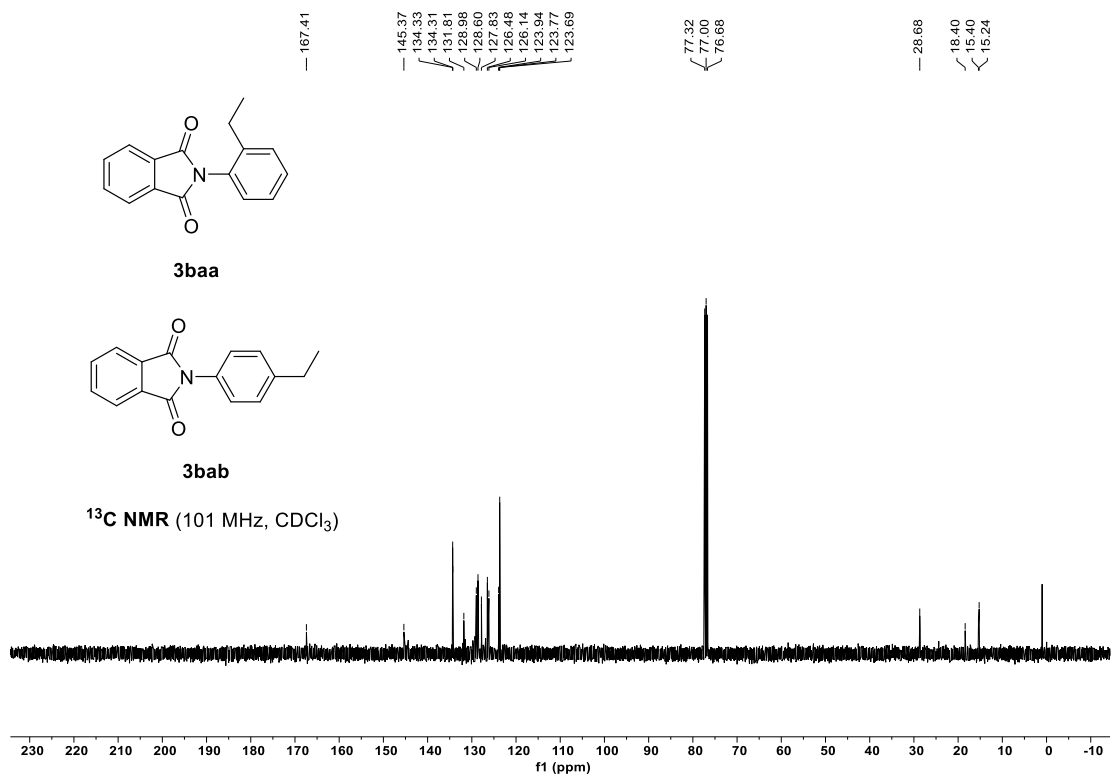

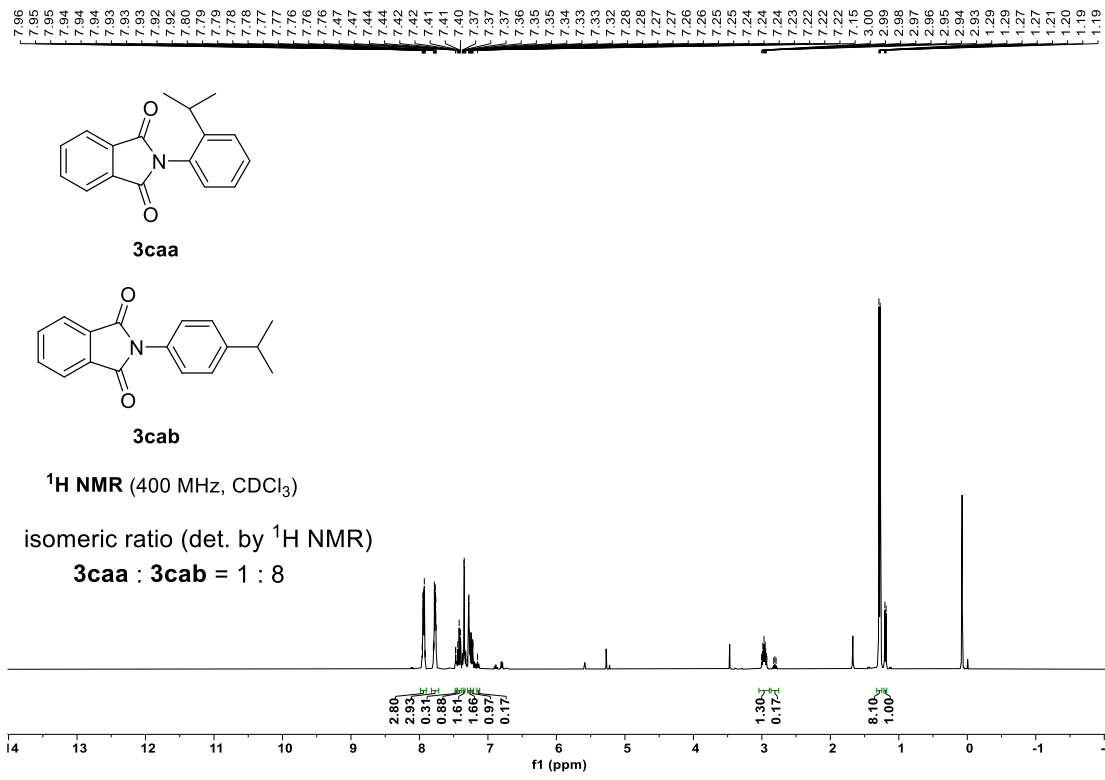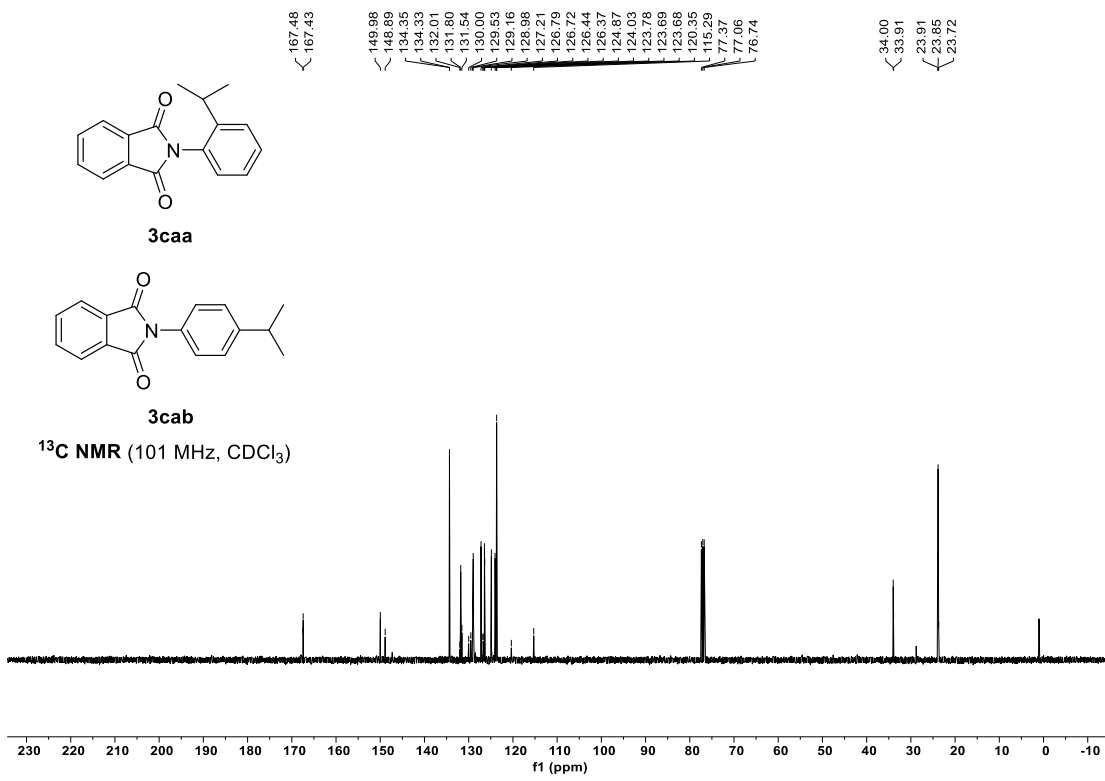

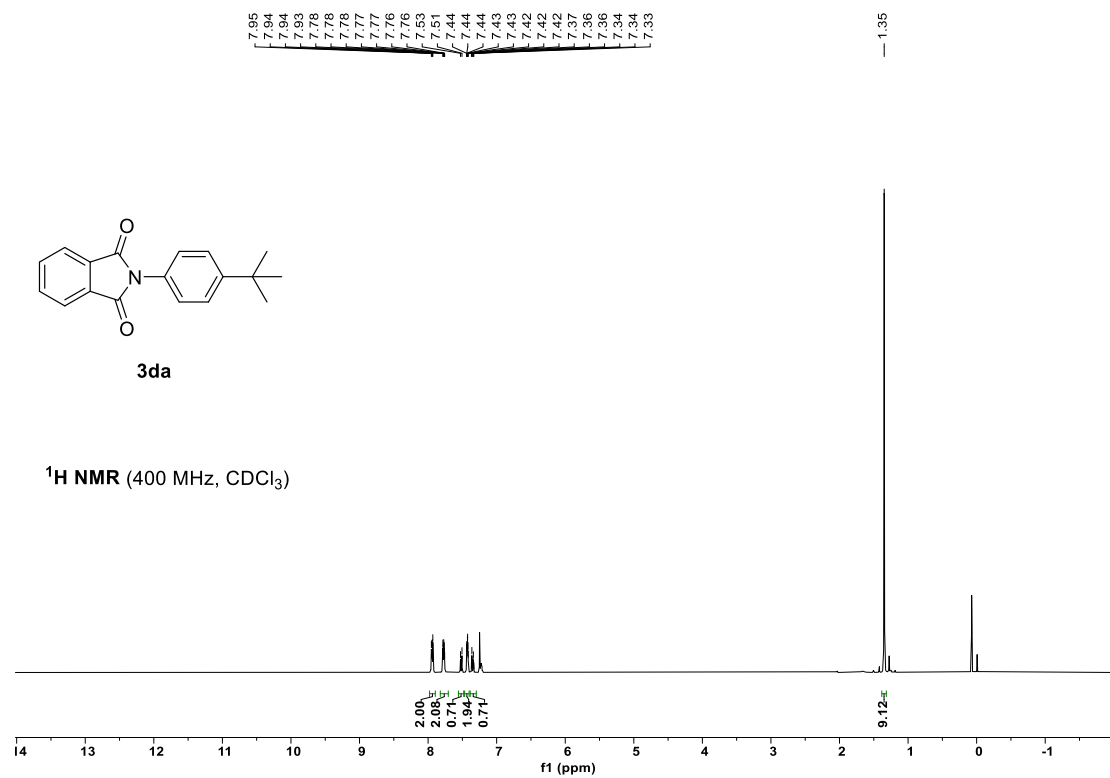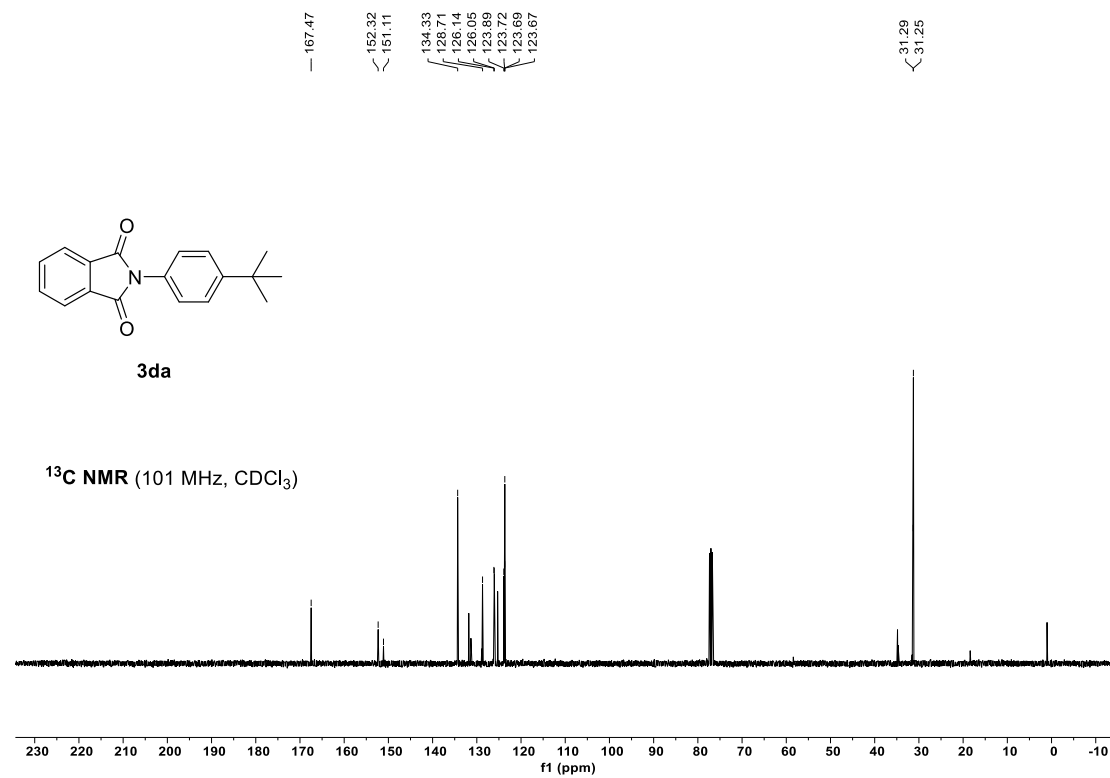

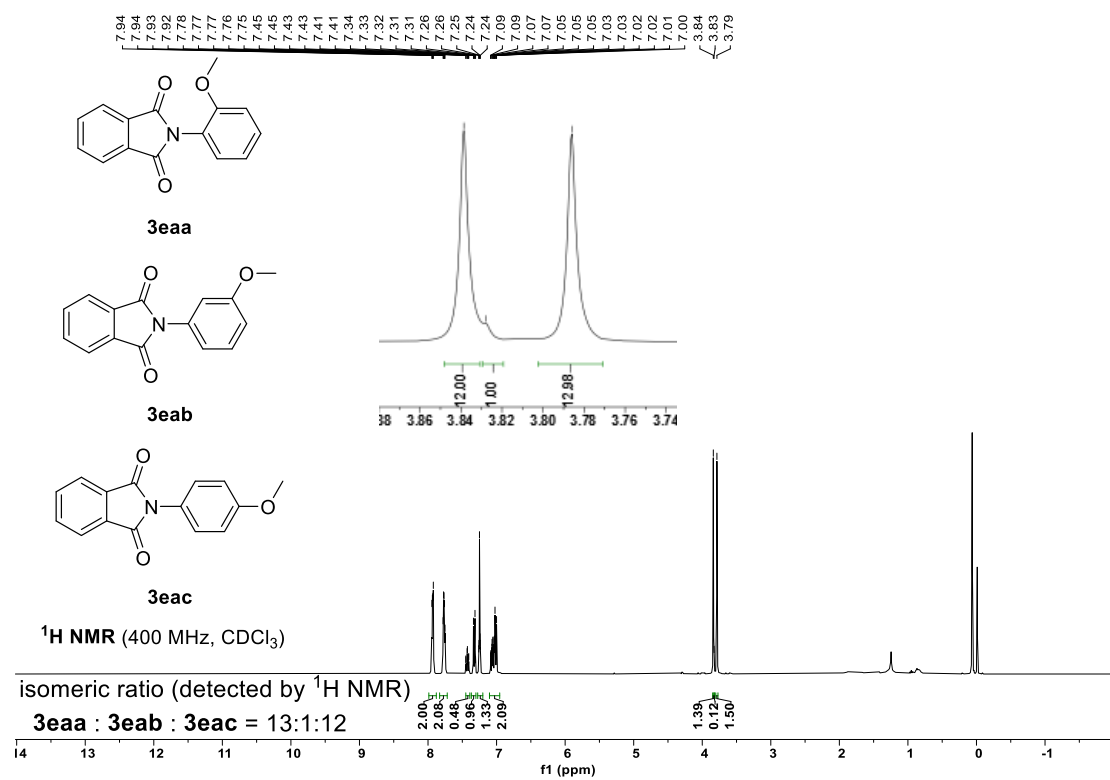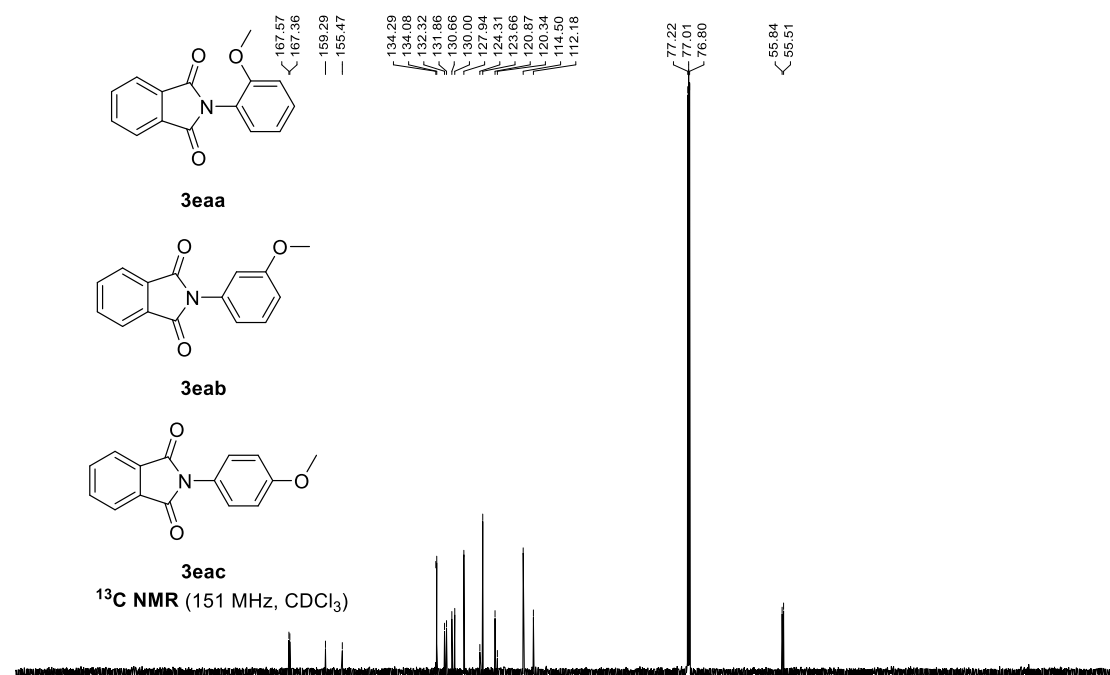

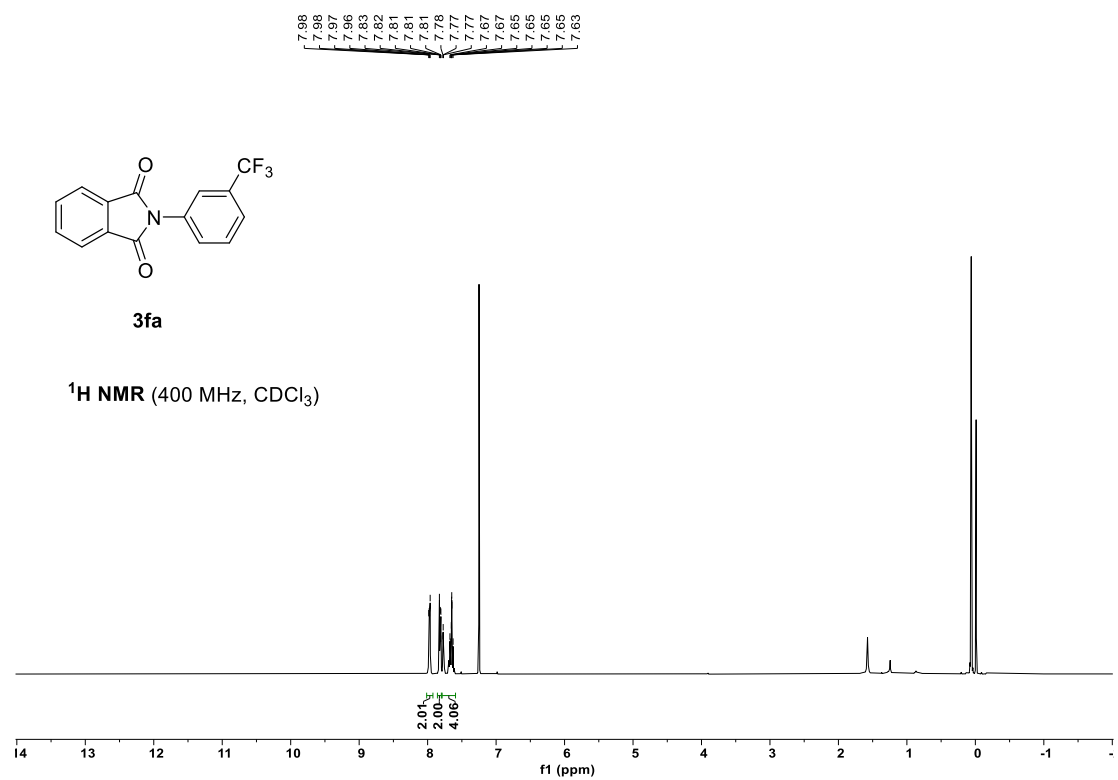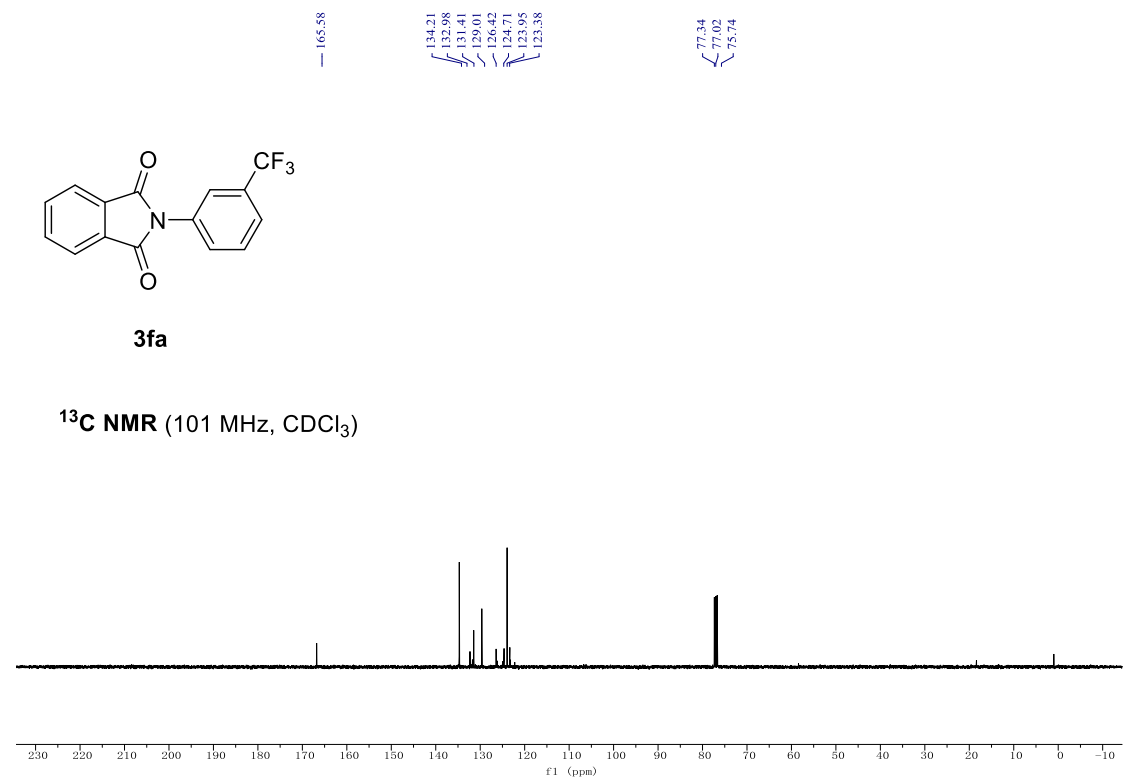

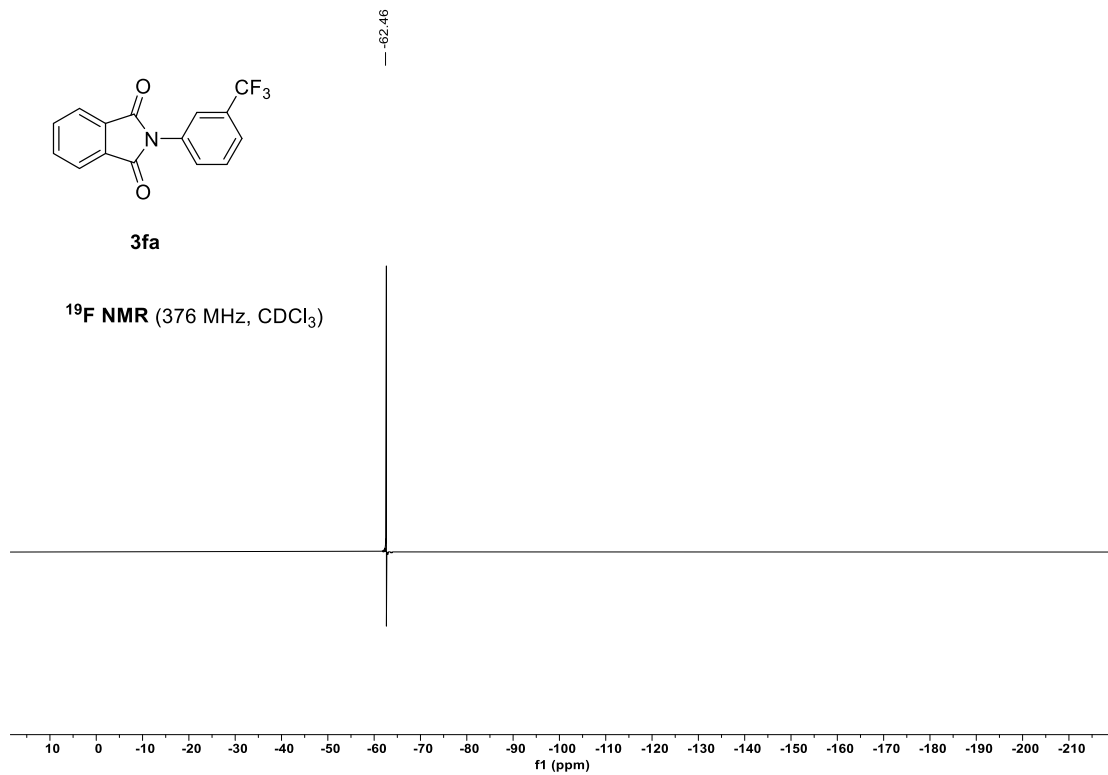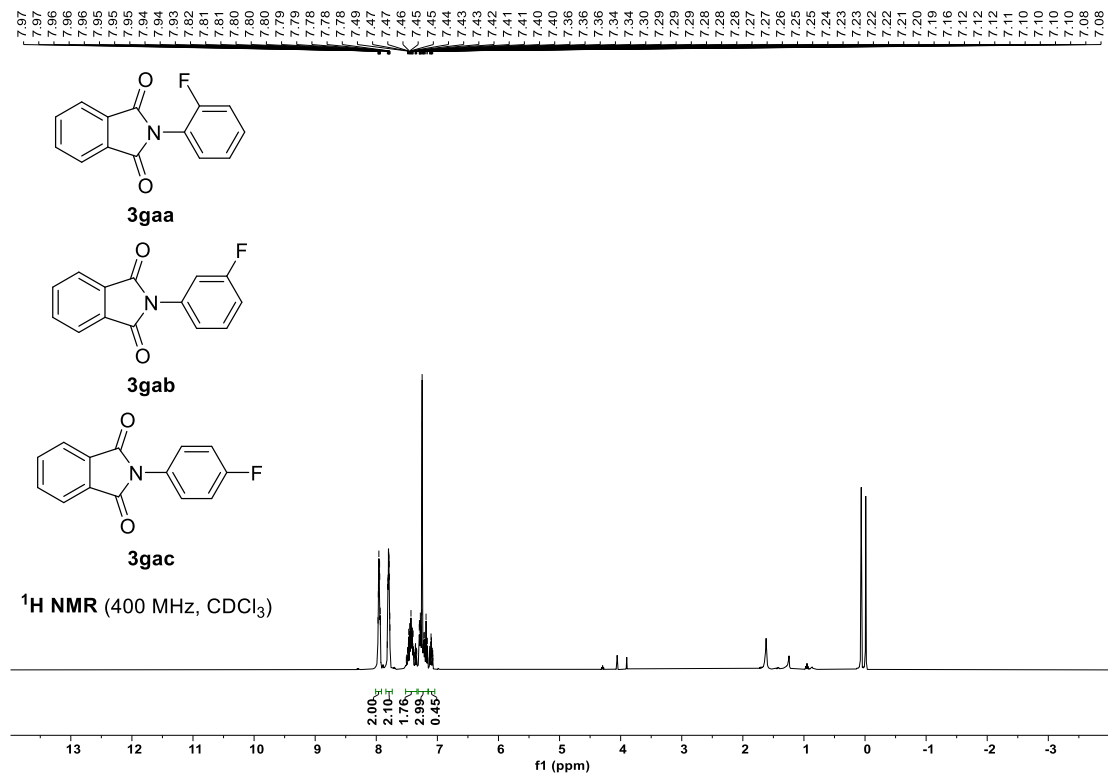

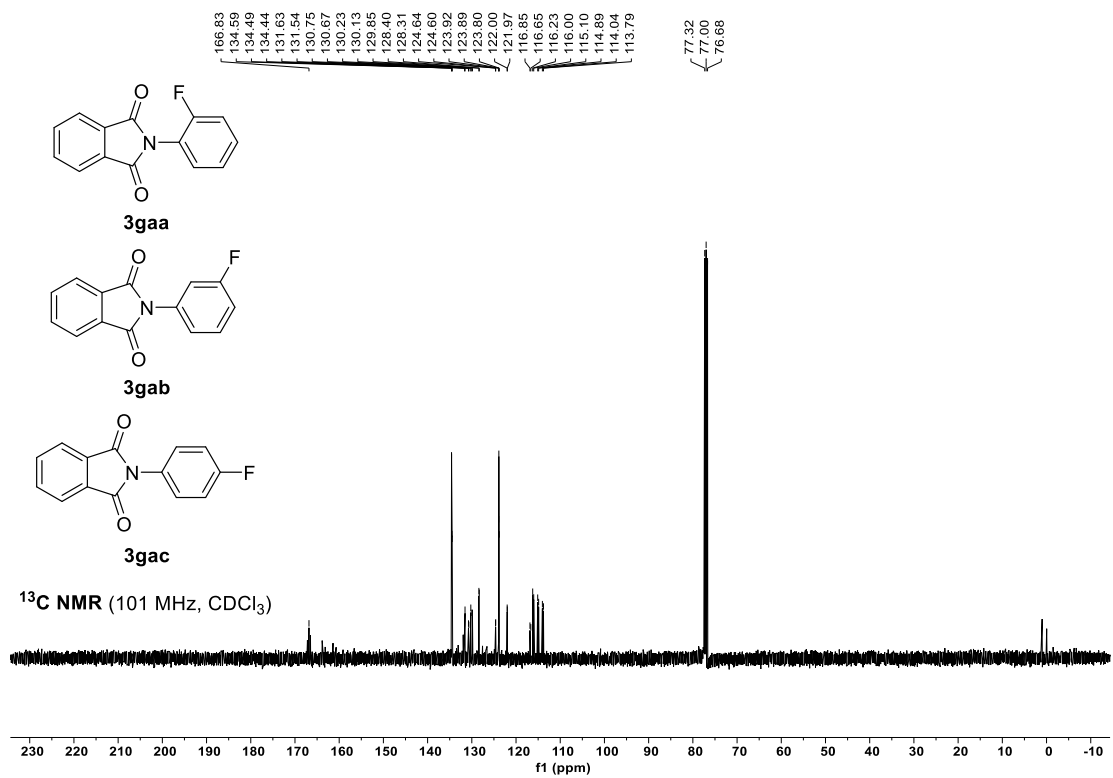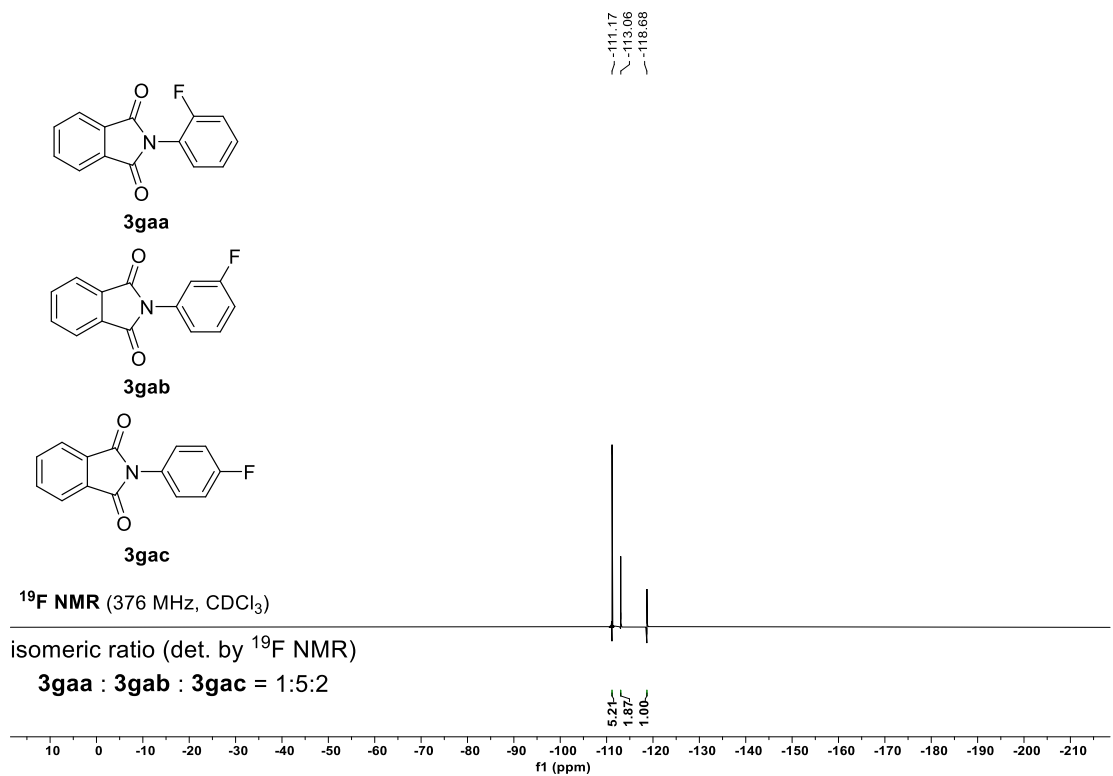



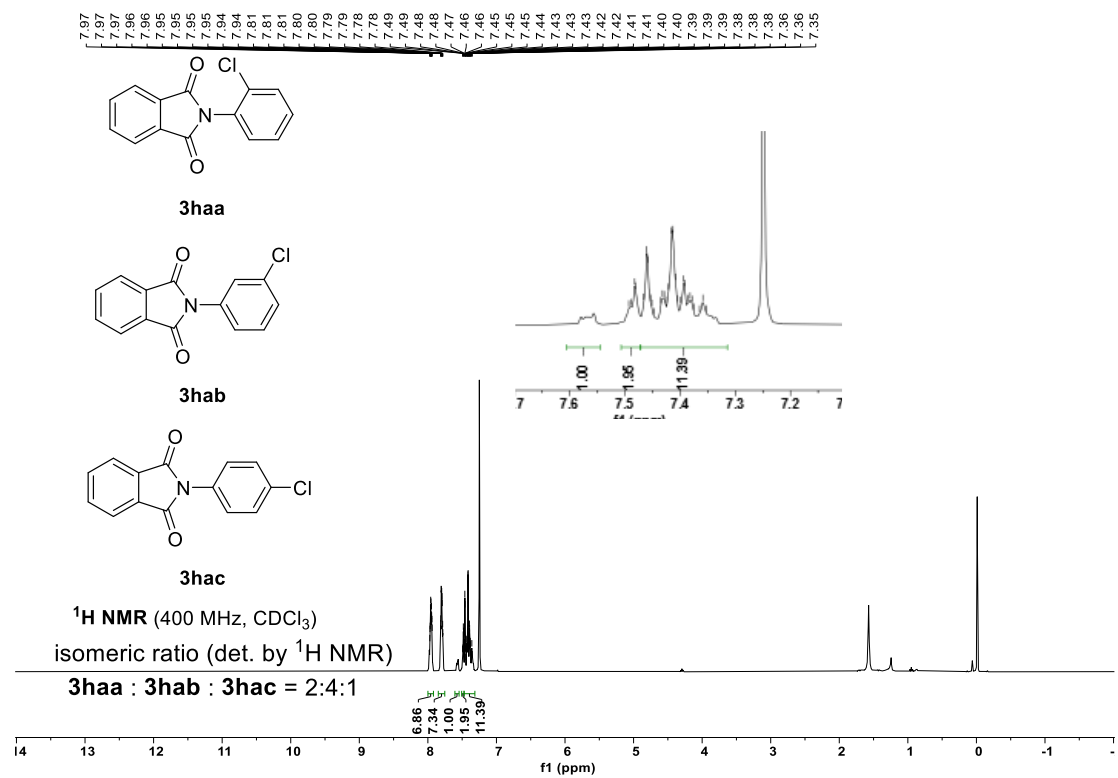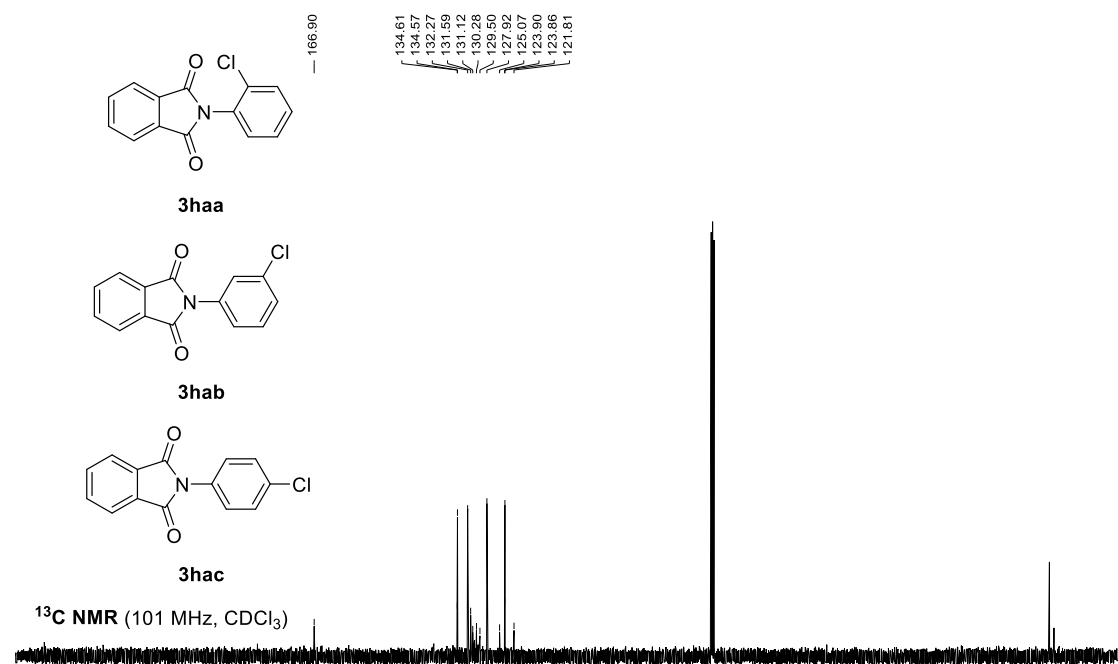

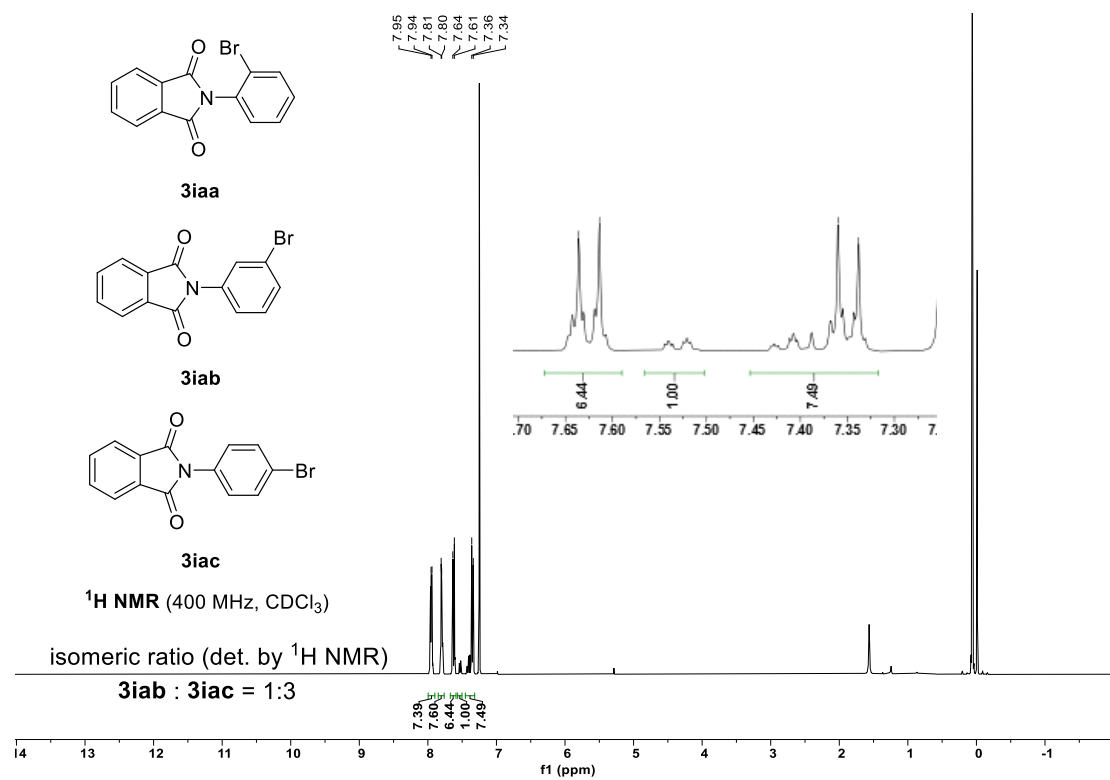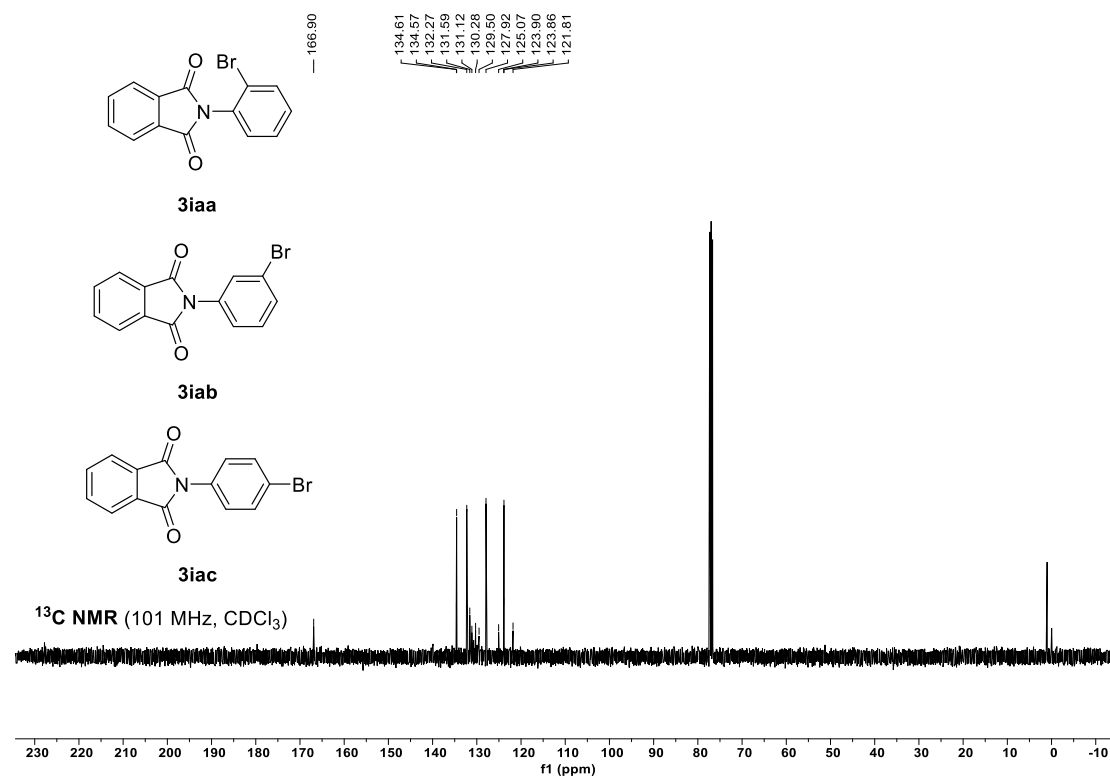

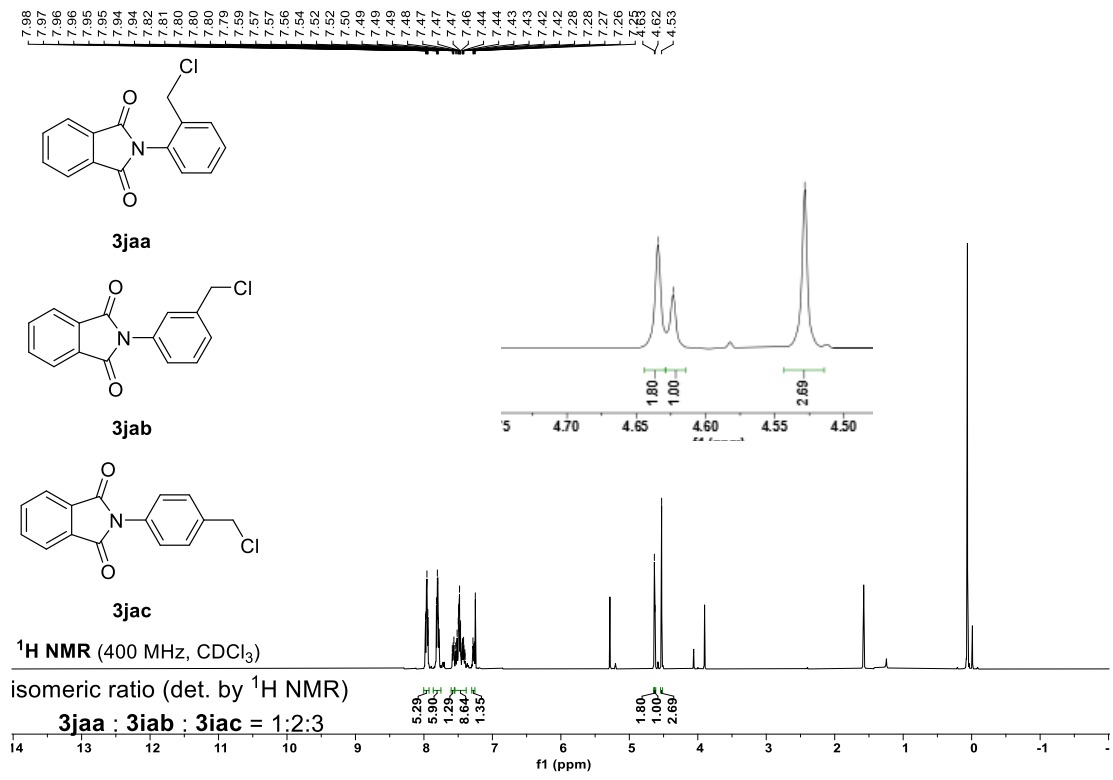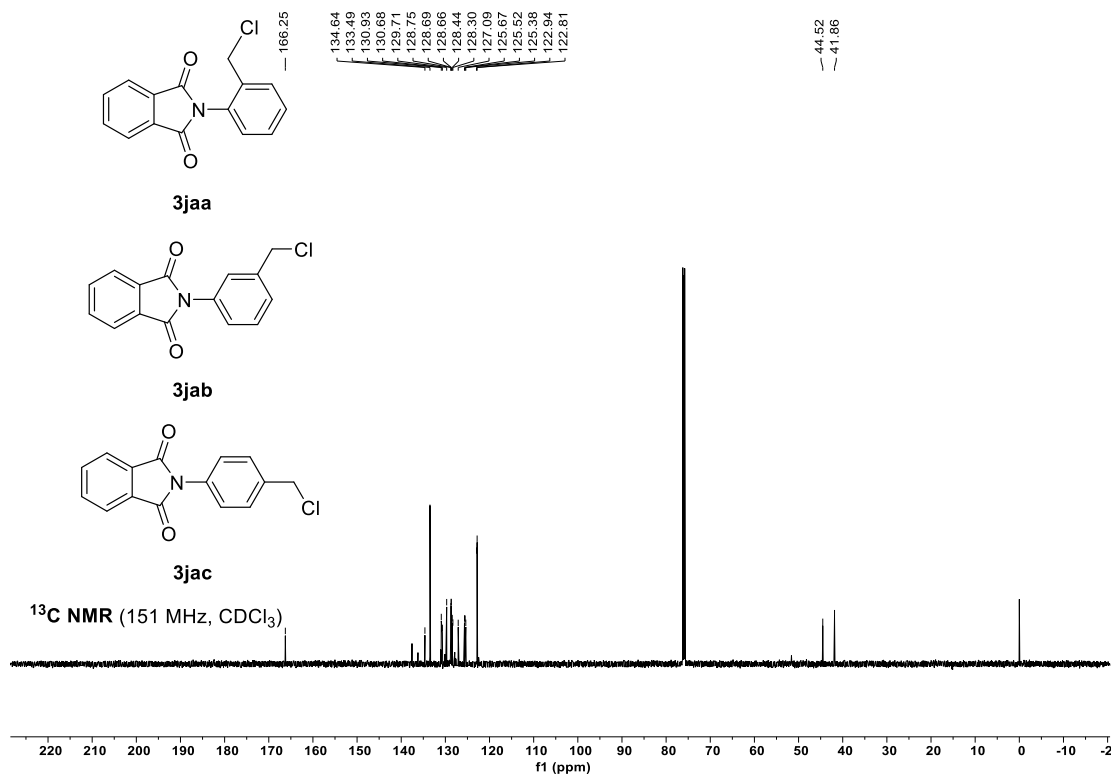



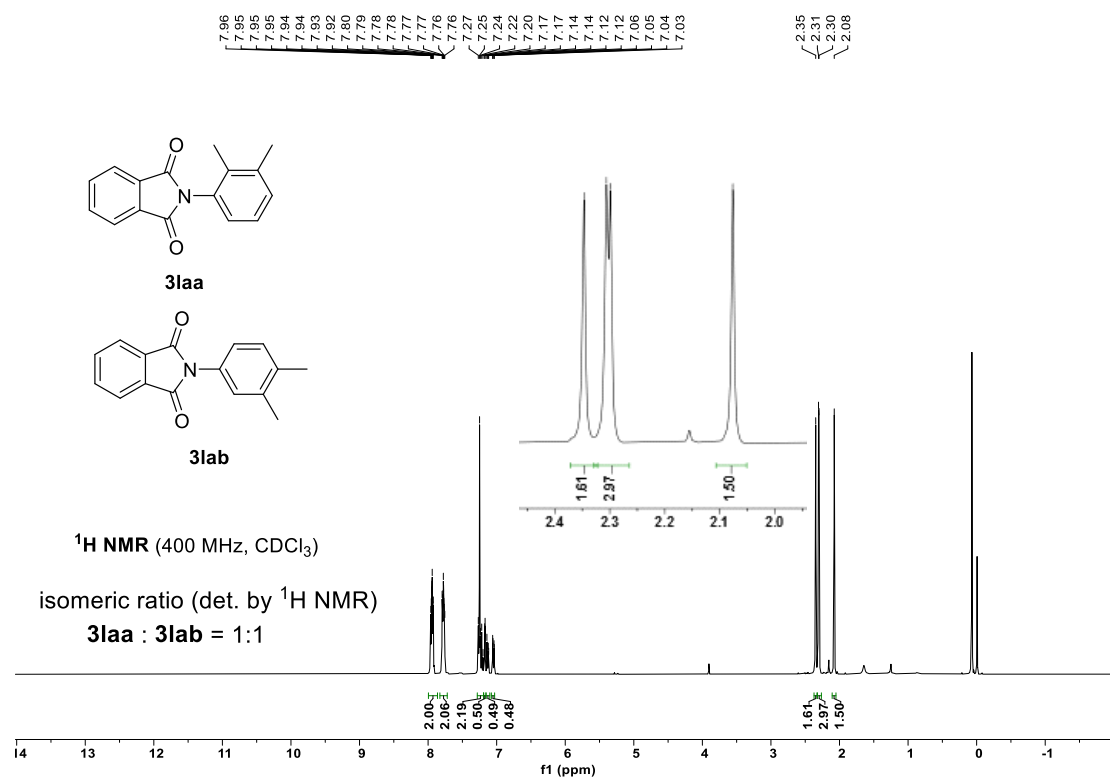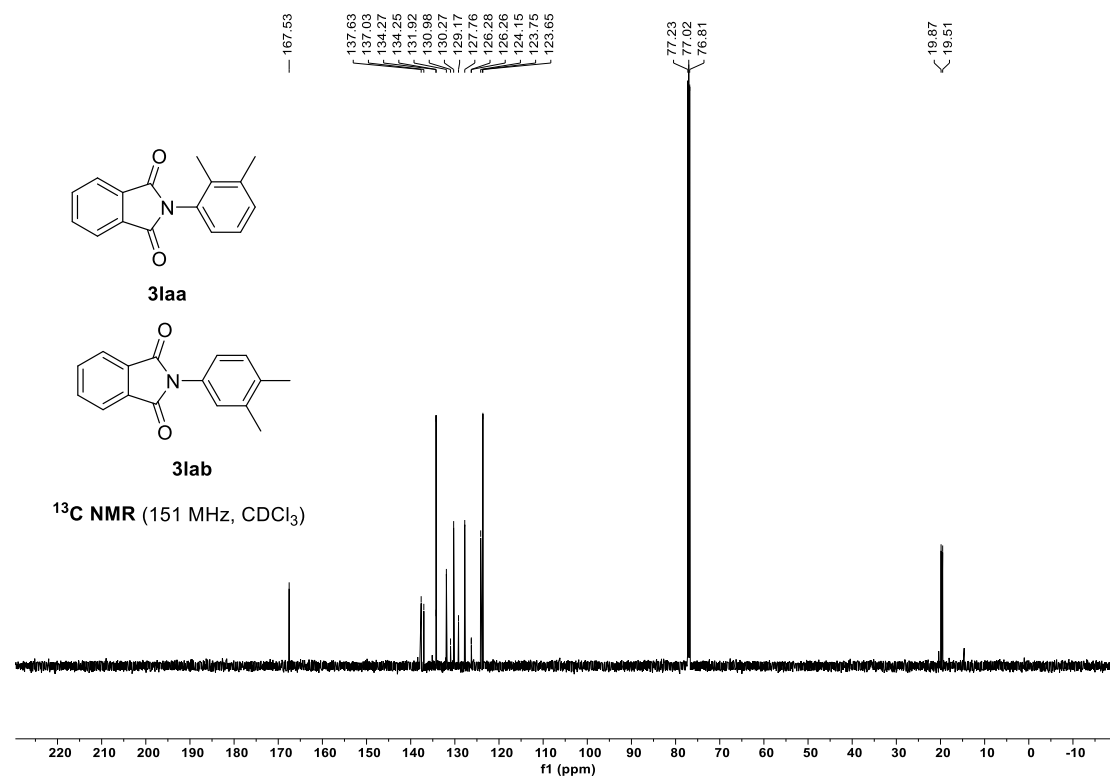

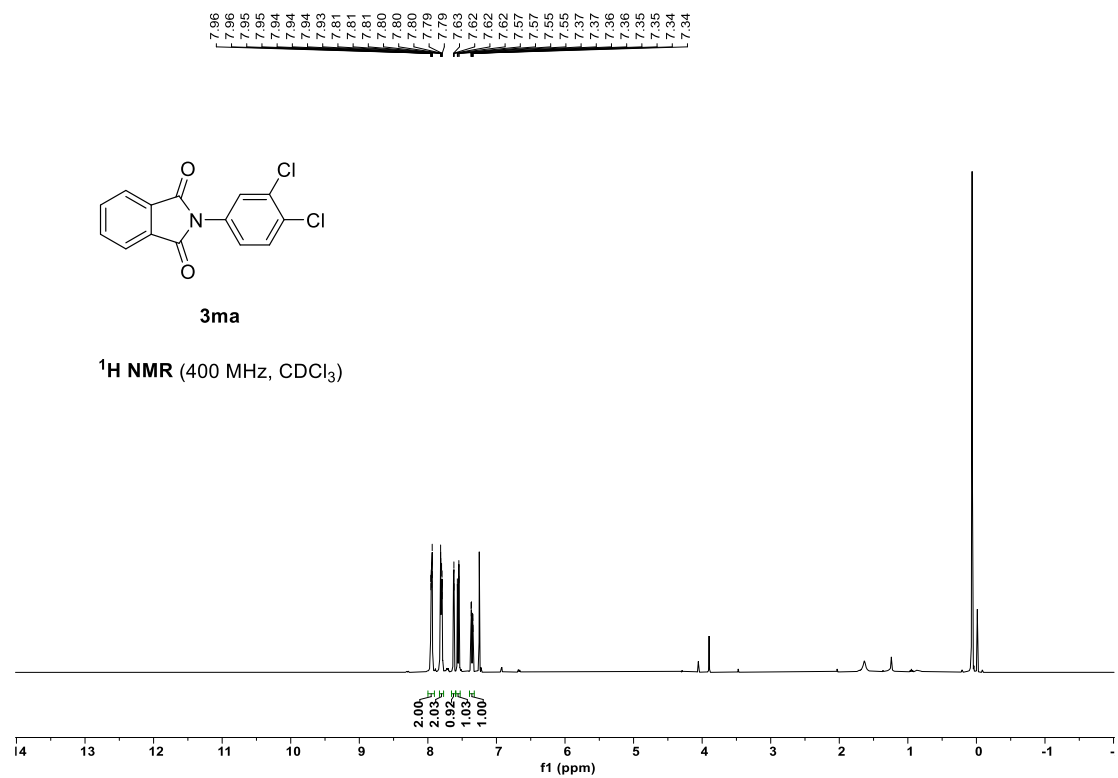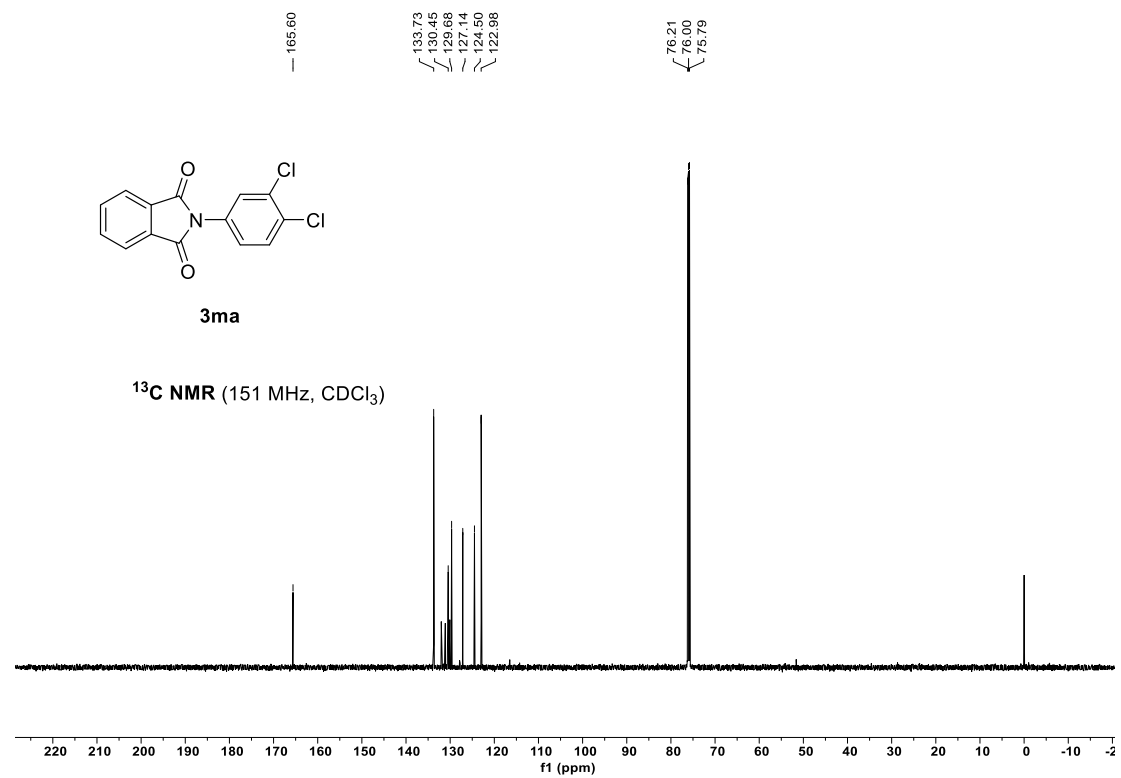

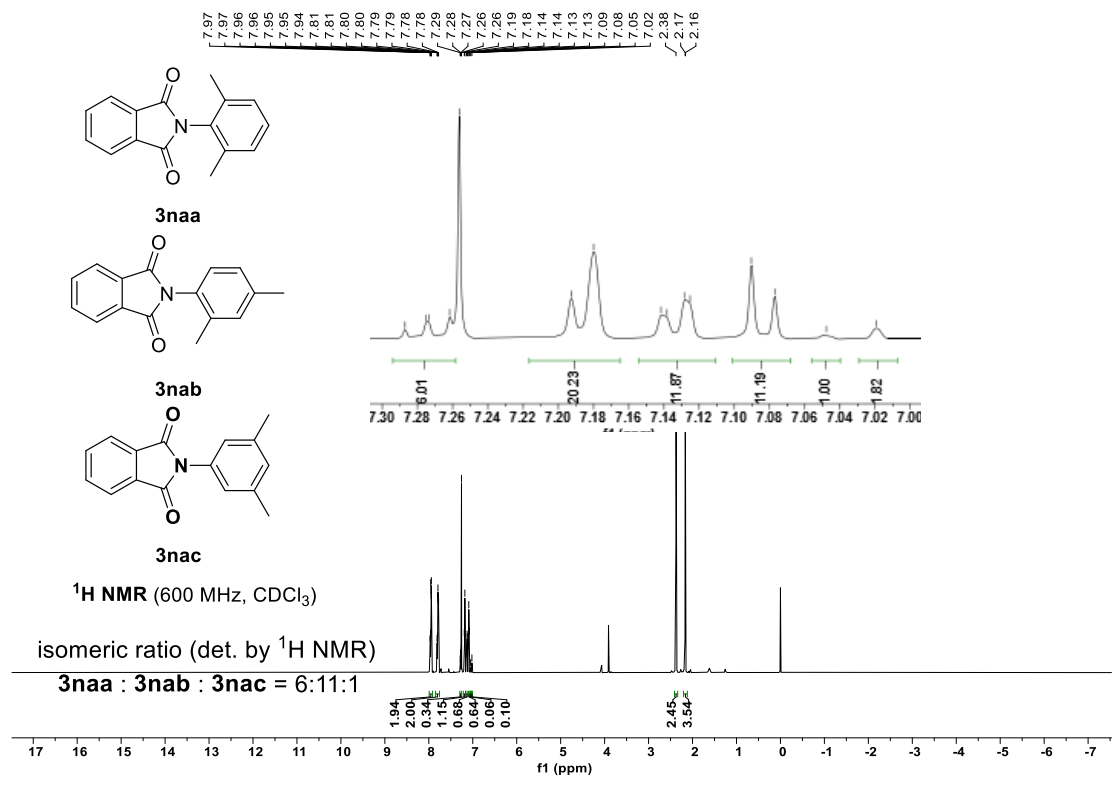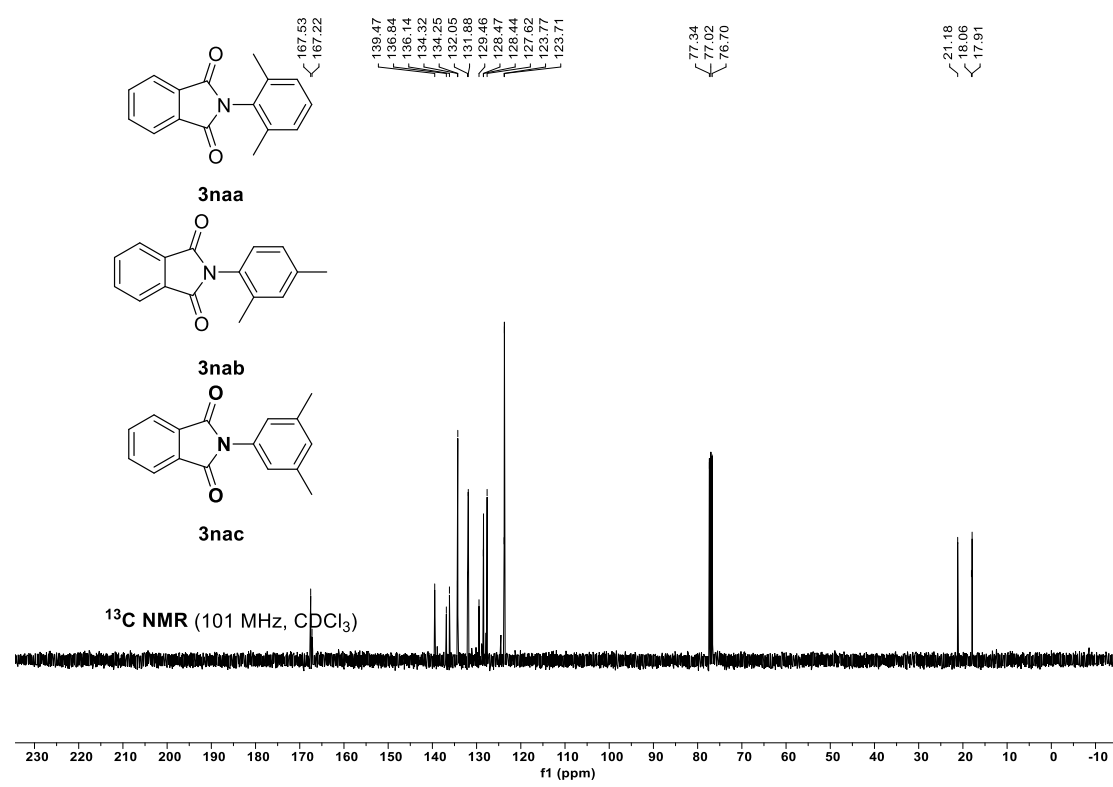

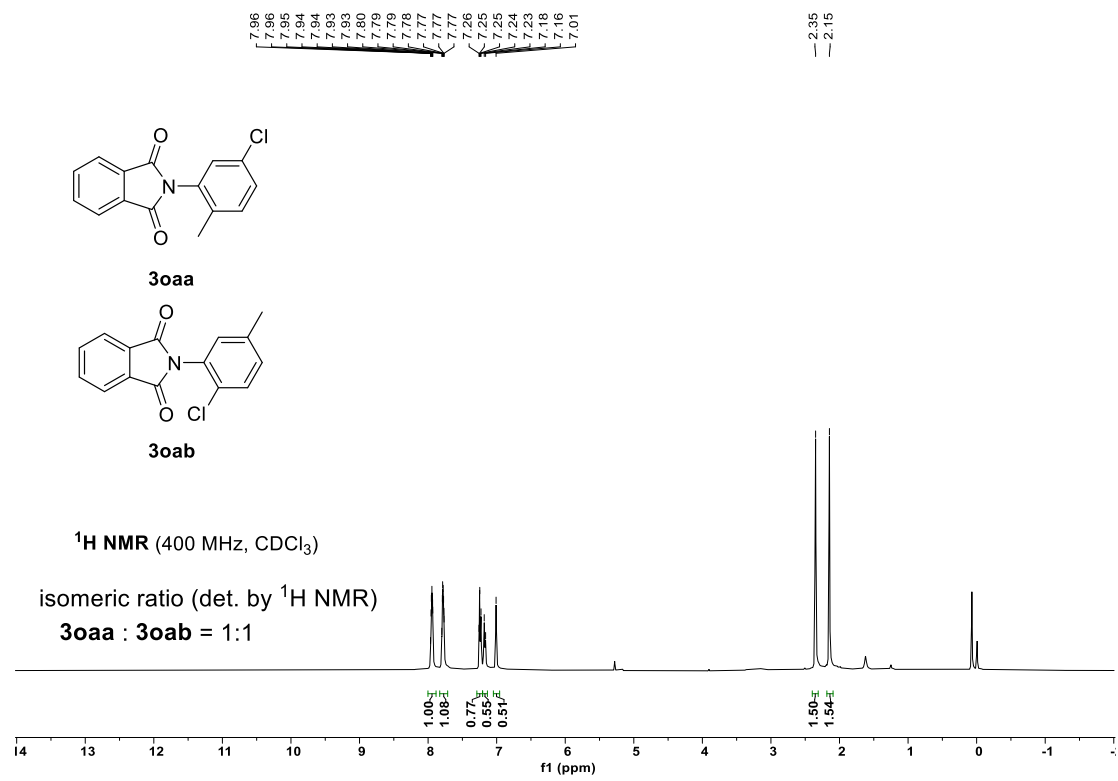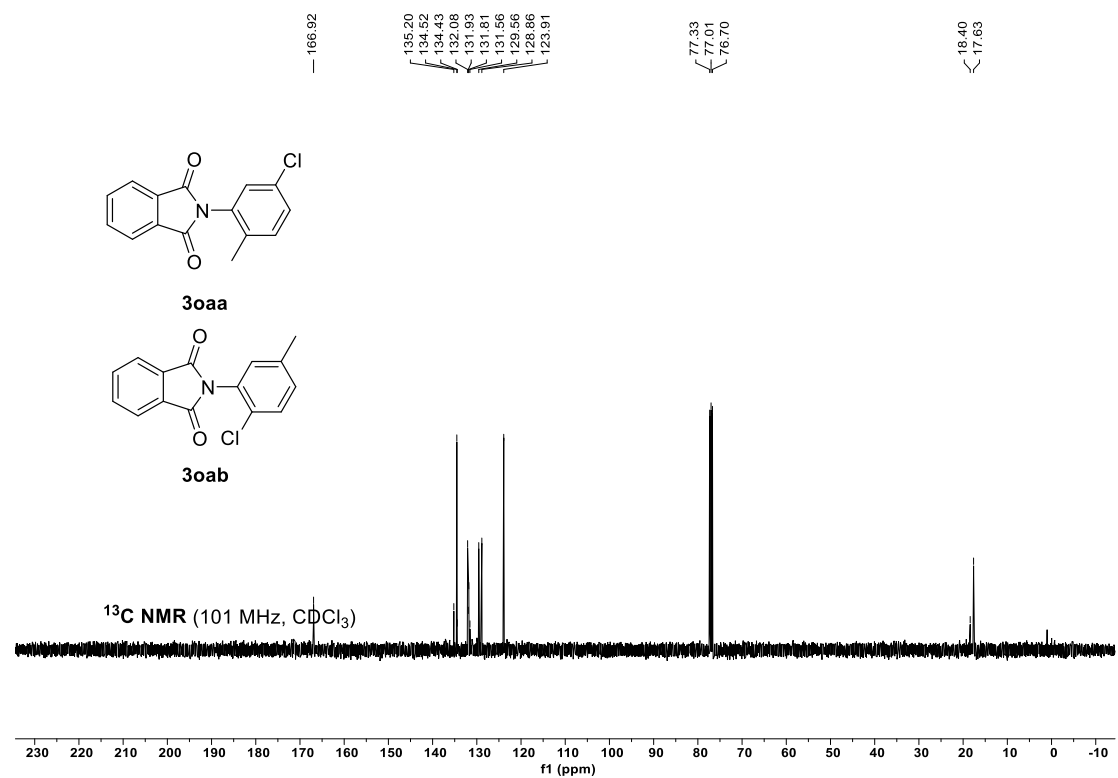



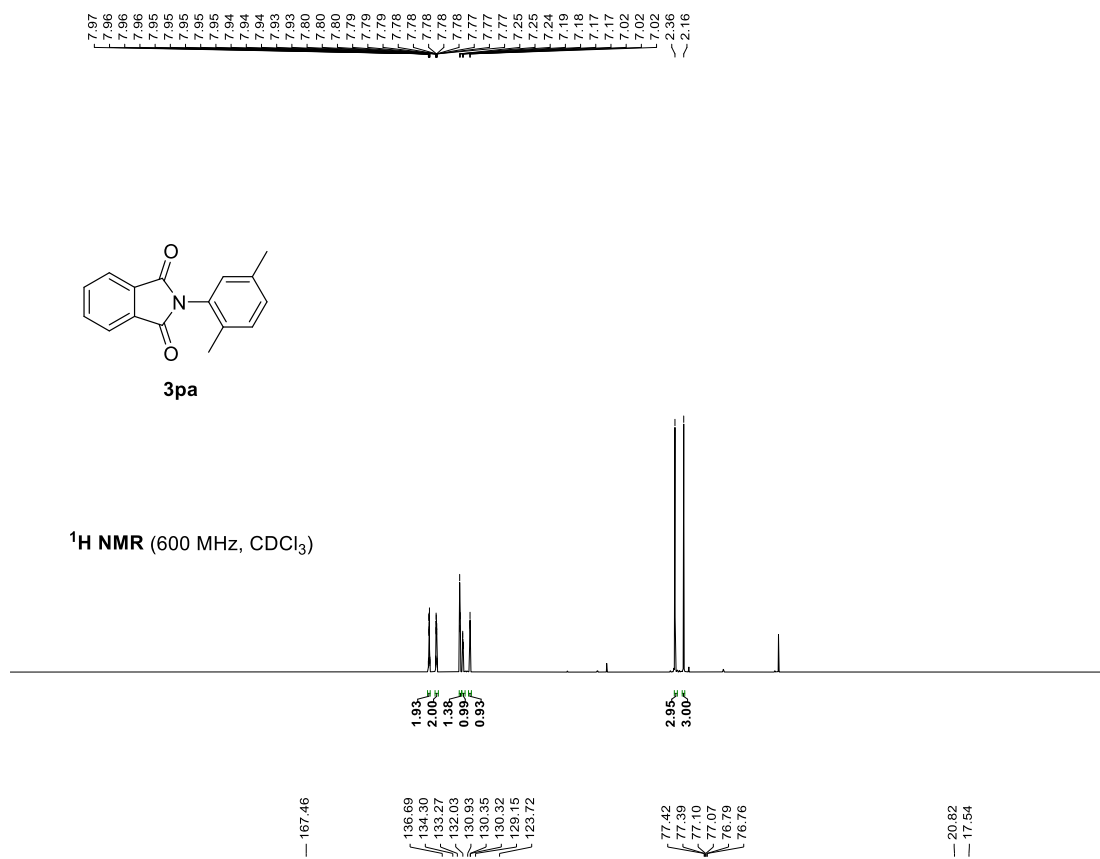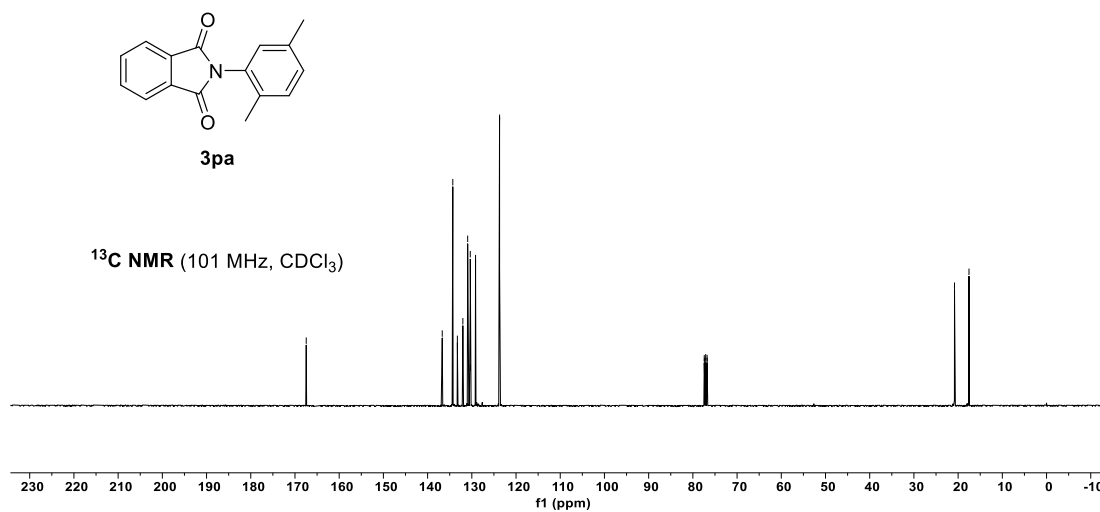

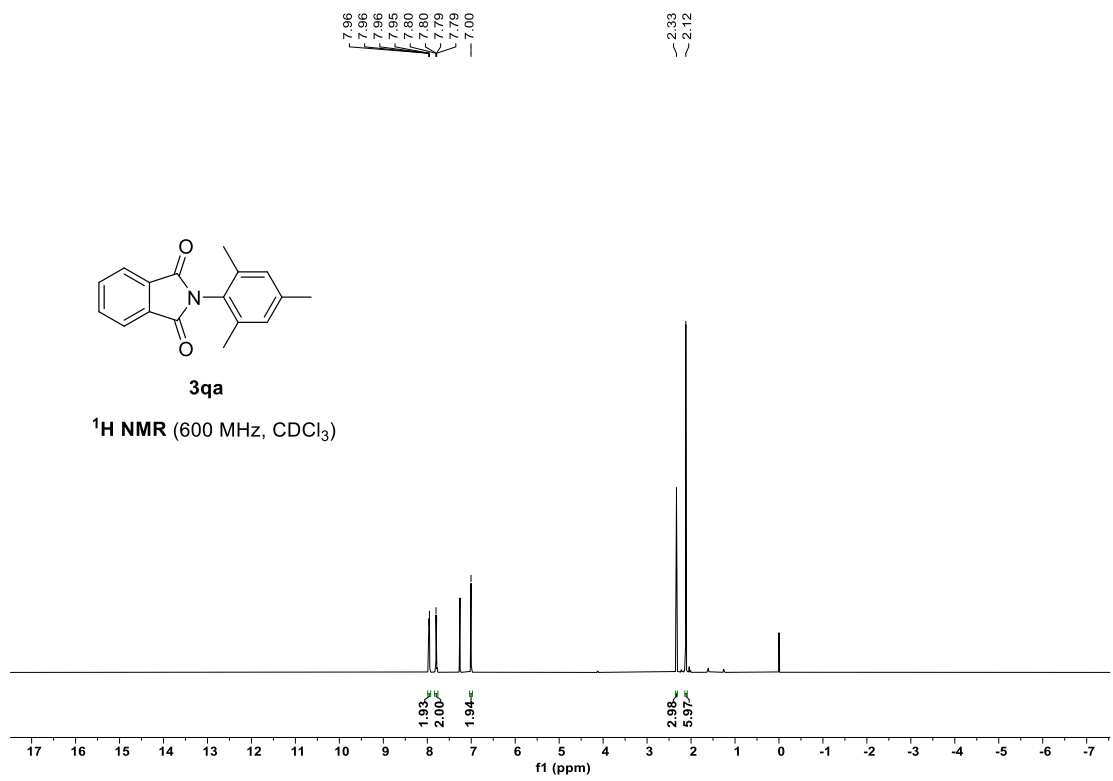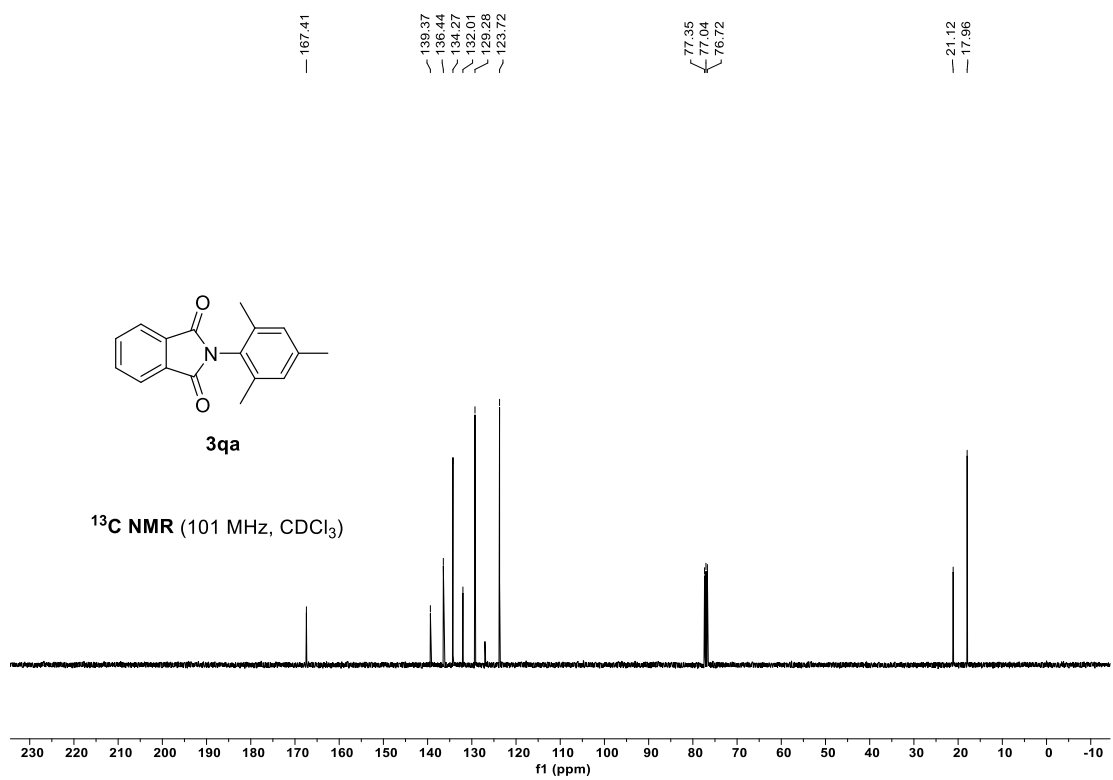

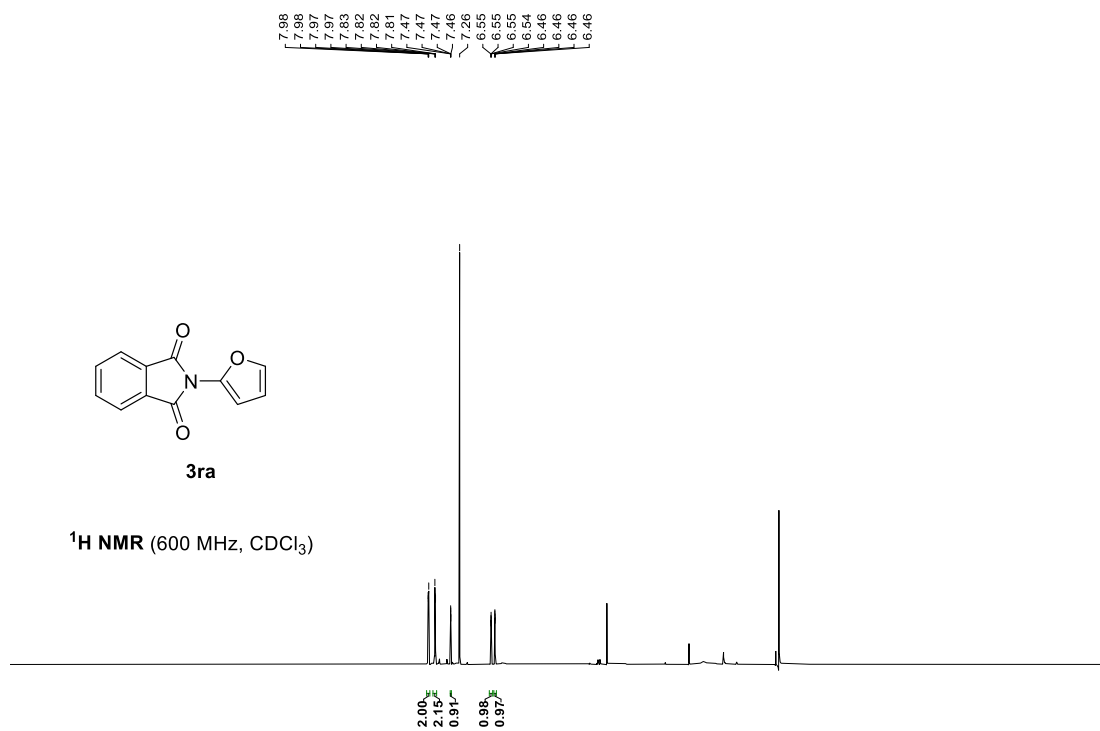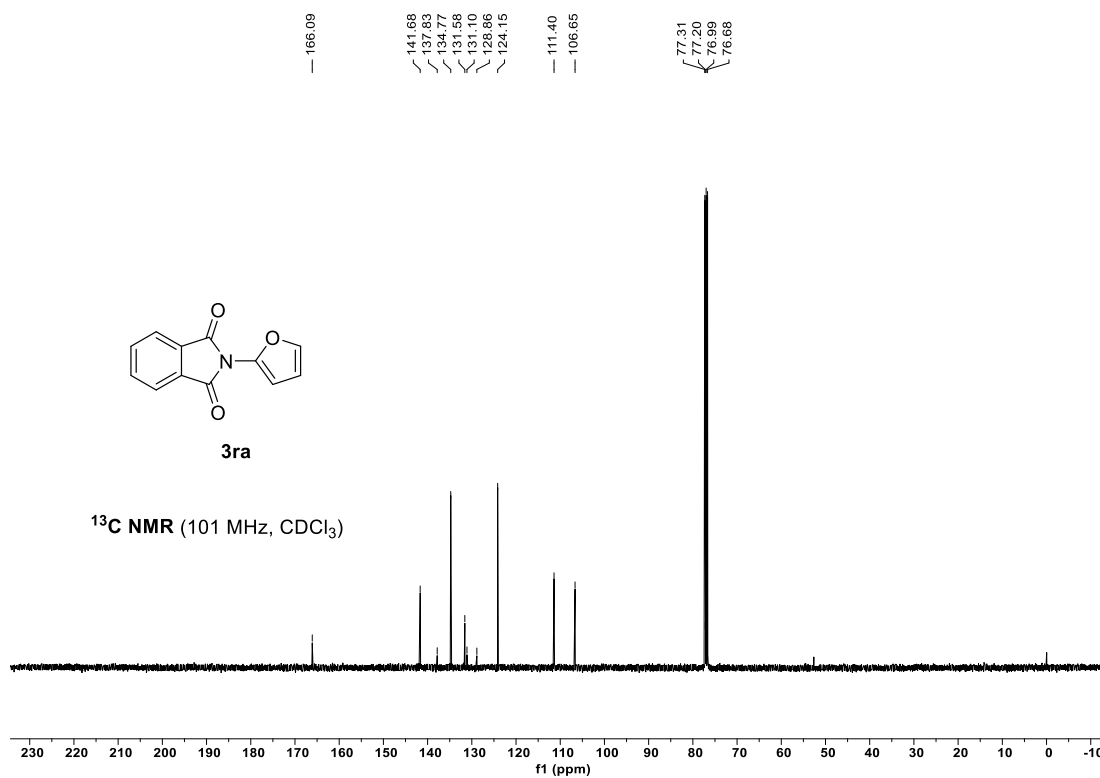

7.94  
7.94  
7.93  
7.93  
7.92  
7.92  
7.91  
7.91  
7.78  
7.77  
7.77  
7.76  
7.76  
7.76  
7.54  
7.54  
7.53  
7.53  
7.52  
7.52  
7.51  
7.51  
7.25  
7.25  
7.24  
7.24  
7.05  
7.05  
7.04  
7.04  
7.03  
7.03  
7.02

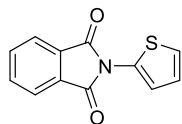

**3sa**

<sup>1</sup>H NMR (400 MHz, CDCl<sub>3</sub>)

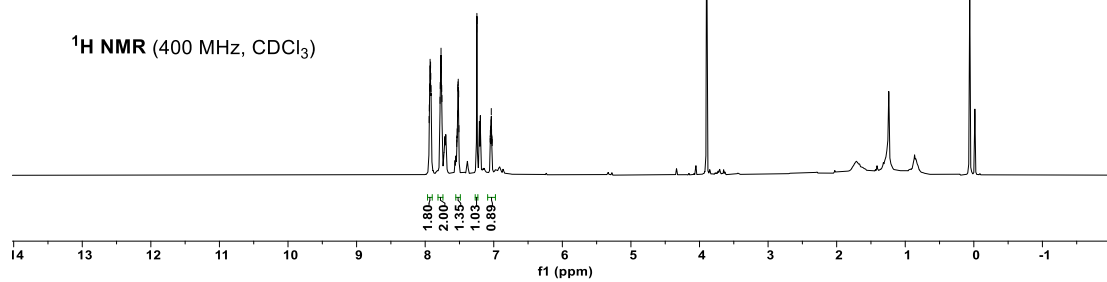

165.96

135.58  
133.99  
131.42  
126.39  
125.25  
123.89  
121.91  
120.40

77.32  
77.00  
76.86

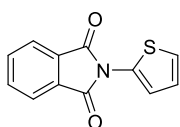

**3sa**

<sup>13</sup>C NMR (101 MHz, CDCl<sub>3</sub>)

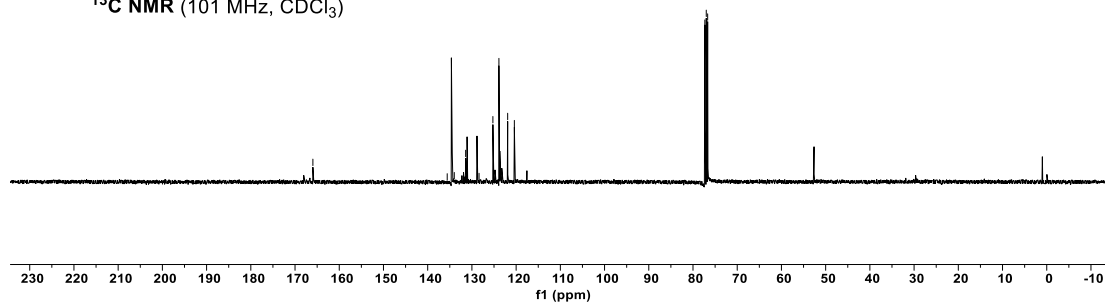

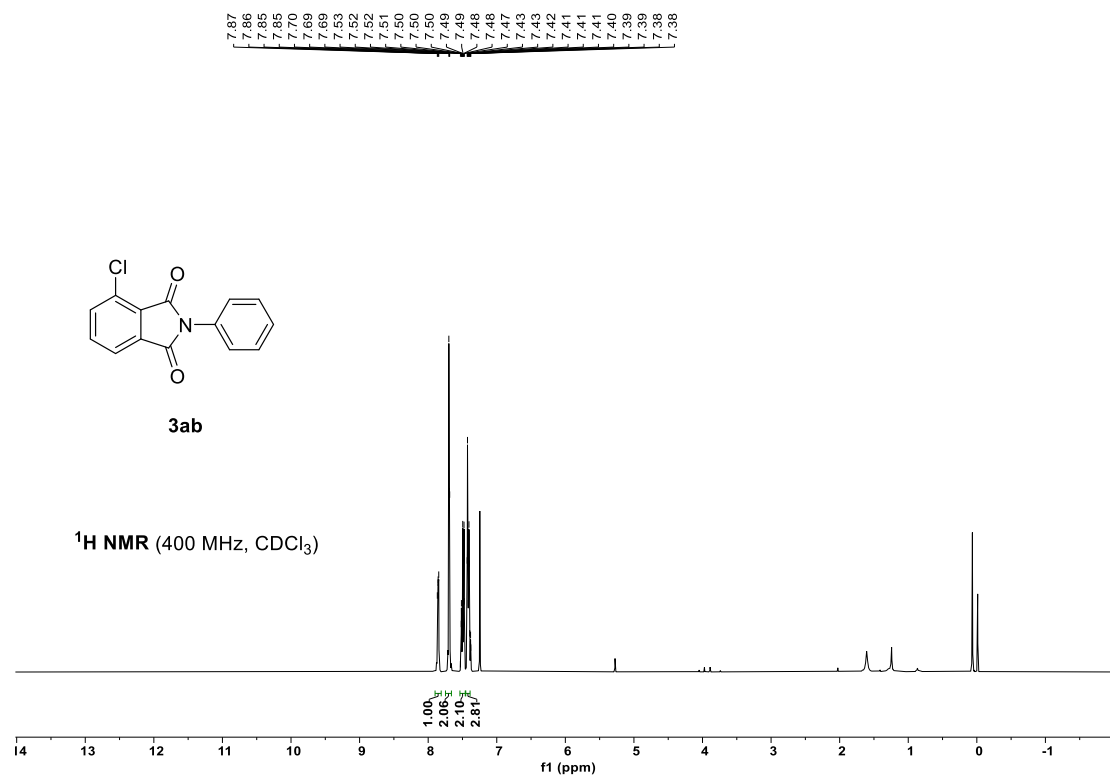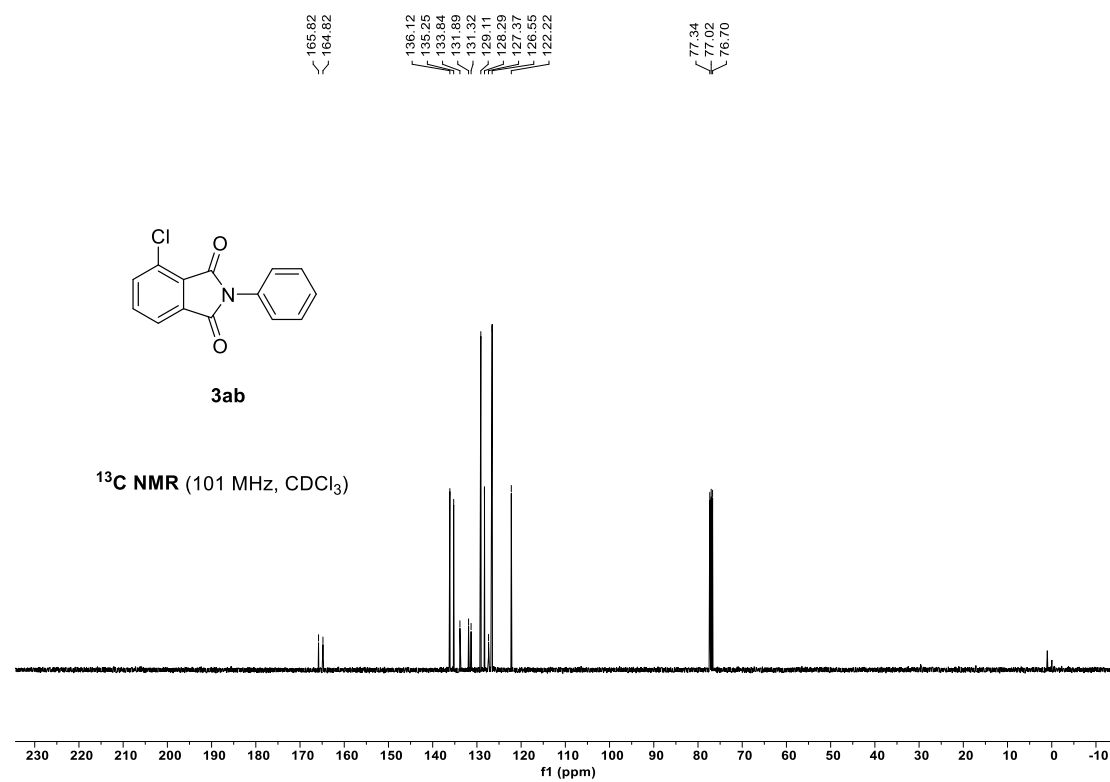



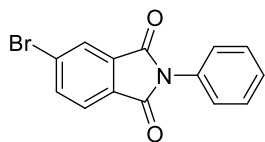

**3ad**

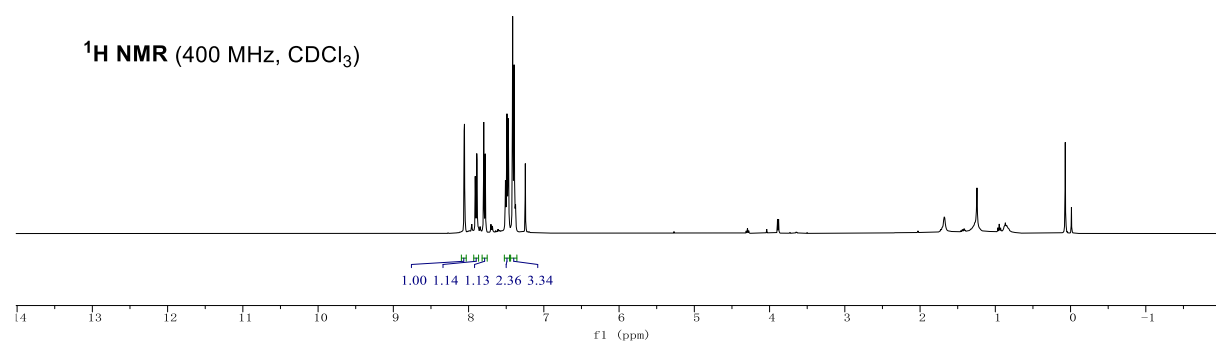

186.43  
185.05

138.01  
133.34  
131.36  
130.20  
129.30  
128.28  
127.06  
126.44  
124.93

77.37  
77.05  
76.73

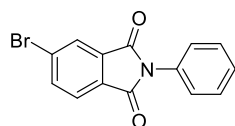

**3ad**

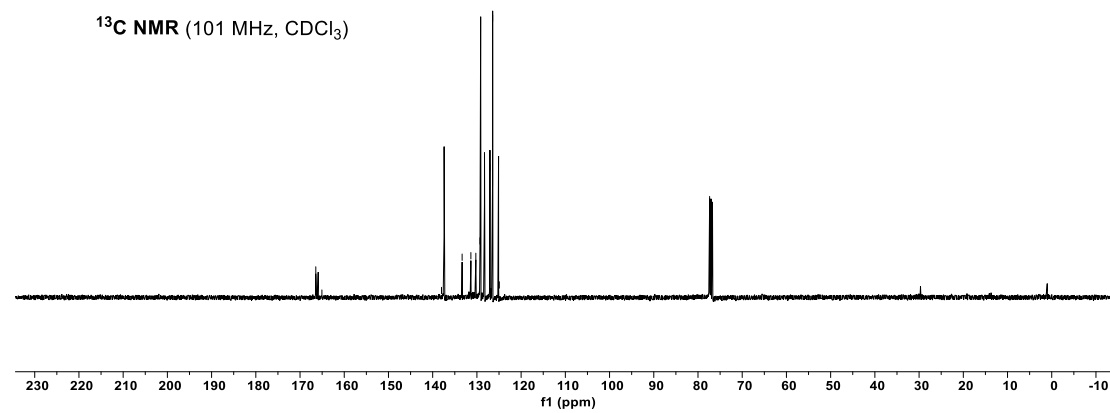

Supplement: d1qo00710f1.pdf [file d1qo00710f1.pdf]
